# Contents

|          |                                                                               |           |
|----------|-------------------------------------------------------------------------------|-----------|
| <b>1</b> | <b>Introduction</b>                                                           | <b>2</b>  |
| <b>2</b> | <b>Results</b>                                                                | <b>4</b>  |
| 2.1      | Behavioral results . . . . .                                                  | 5         |
| 2.2      | Measuring a new foreperiod effect on the ITPC elicited by standards . . . . . | 5         |
| 2.3      | Direct evidence for the SFP effect on ITPC . . . . .                          | 8         |
| 2.4      | The SFP effect on ITPC is correlated with subjects' behavior . . . . .        | 10        |
| 2.5      | Timing of the SFP effect on ITPC . . . . .                                    | 13        |
| <b>3</b> | <b>Discussion</b>                                                             | <b>15</b> |
| 3.1      | What psychophysical processes generate the SFP effect on ITPC? . . . . .      | 16        |
| 3.2      | Relations to previous investigations . . . . .                                | 16        |
| 3.3      | What neural processes generate the SFP effect on ITPC? . . . . .              | 20        |
| 3.4      | Single-trial predictive methods for EEG . . . . .                             | 21        |
| 3.5      | Future work . . . . .                                                         | 23        |
| <b>4</b> | <b>Summary</b>                                                                | <b>23</b> |
| <b>5</b> | <b>Methods</b>                                                                | <b>23</b> |
| 5.1      | Experiment information . . . . .                                              | 23        |
| 5.1.1    | Subjects . . . . .                                                            | 24        |
| 5.1.2    | Stimuli . . . . .                                                             | 24        |
| 5.1.3    | Experimental design . . . . .                                                 | 24        |
| 5.2      | EEG acquisition . . . . .                                                     | 24        |
| 5.3      | Characterized epochs . . . . .                                                | 24        |
| 5.4      | Deviation from the mean phase . . . . .                                       | 25        |
| <b>6</b> | <b>Acknowledgments</b>                                                        | <b>25</b> |
|          | <b>Glossary</b>                                                               | <b>26</b> |
| <b>7</b> | <b>Bibliography</b>                                                           | <b>27</b> |
| <b>A</b> | <b>Appendix</b>                                                               | <b>1</b>  |
| A.1      | Controls on the SFP effect on ITPC . . . . .                                  | 1         |
| A.1.1    | The ITPC triggered by standards is the modulated variable . . . . .           | 1         |
| A.1.2    | The SFP duration is the modulating variable . . . . .                         | 3         |
| A.2      | Correlations between ITC and behavior . . . . .                               | 3         |
| A.3      | Simulations of the SFP effect on ITPC . . . . .                               | 3         |
| A.4      | Selection of the optimal maximum SFPD . . . . .                               | 5         |
| A.5      | Supplementary methods . . . . .                                               | 8         |
| A.5.1    | ICA data preprocessing . . . . .                                              | 8         |
| A.5.2    | Clustering of ICs . . . . .                                                   | 8         |
| A.5.3    | Circular statistics concepts . . . . .                                        | 8         |
| A.5.4    | ITC and Peak ITC frequency . . . . .                                          | 9         |

|    |                                                                                            |    |
|----|--------------------------------------------------------------------------------------------|----|
| 1  | A.5.5 Measuring phases in single trials . . . . .                                          | 11 |
| 2  | A.5.6 Relation between the averaged DMP and the ITC . . . . .                              | 11 |
| 3  | A.5.7 Linear regression model . . . . .                                                    | 12 |
| 4  | A.5.8 Method to estimate the coefficients in the linear regression model . . . . .         | 12 |
| 5  | A.5.9 Adjustment for multiple comparisons in correlation tests . . . . .                   | 15 |
| 6  | A.5.10 Calculation of robust correlation coefficients and corresponding p-values . . . . . | 16 |
| 7  | A.5.11 ANOVA procedure . . . . .                                                           | 17 |
| 8  | A.5.12 Further information on ANOVAs . . . . .                                             | 18 |
| 9  | A.5.13 Identification of peaks in coefficients . . . . .                                   | 19 |
| 10 | A.5.14 Additional statistical information . . . . .                                        | 19 |
| 11 | A.6 Supplementary figures . . . . .                                                        | 20 |
| 12 | A.7 Supplementary tables . . . . .                                                         | 22 |
| 13 | A.8 Code and sample data . . . . .                                                         | 22 |

# A new foreperiod effect on single-trial phase coherence.

## Part I: existence and relevance

Joaquin Rapela\*<sup>1,2</sup>, Marissa Westerfield<sup>1,3</sup>, Jeanne Townsend<sup>3</sup>, and Scott Makeig<sup>1</sup>

<sup>1</sup>Swartz Center for Computational Neuroscience; University of California San Diego

<sup>2</sup>Instituto de Investigación en Luz, Ambiente y Visión; Universidad Nacional de Tucumán–Consejo Nacional de Investigaciones Científicas y Técnicas, Argentina

<sup>3</sup>Research on Autism and Development Laboratory; University of California San Diego

August 5, 2016

### Abstract

Expecting events in time leads to more efficient behavior. A remarkable early finding in the study of temporal expectancy is the foreperiod effect on reaction times; i.e., the fact that the time period between a warning signal and an impendent stimuli, to which subjects are instructed to respond as quickly as possible, influences reaction times. Recently it has been shown that the phase of oscillatory activity preceding stimulus presentation is related to behavior. Here we connect both of these findings by reporting a novel foreperiod effect on the inter-trial phase coherence triggered by a stimulus to which subjects do not respond. Until now, inter-trial phase coherence has been used to describe a regularity in the phases of groups of trials. We propose a single-trial measure of inter-trial phase coherence and prove its soundness. Equipped with this measure, and using a multivariate decoding method, we demonstrate that the foreperiod duration modulates single-trial phase coherence. In principle, this modulation could be an artifact due to the decoding method used to detect it. We show that this is not the case, since the modulation can also be observed with a very simple averaging method. Although real, the single-trial modulation of inter-trial phase coherence by the foreperiod duration could just reflect a nuisance in our data. We argue against this possibility by showing that the strength of the modulation correlates with subjects' behavioral measures, both error rates and mean-reaction times. We anticipate that the new foreperiod effect on inter-trial phase coherence, and the decoding method used here to detect it, will be important tools to understand cognition at the single-trial level. In Part II of this manuscript, we support this claim, by showing that attention modulates the strength of the new foreperiod effect in a trial-by-trial basis.

Keywords: foreperiod, anticipatory phase, EEG, phase coherence, single trial analysis, variational Bayesian linear regression, independent component analysis.

---

\*rapela@ucsd.edu

# 1 Introduction

The scientific study of temporal expectation begun with the birth of experimental psychology when Wundt (1874) and Woodrow (1914) discovered the effects on reaction times of the delay between a warning signal and an imperative stimulus to which subjects were instructed to respond as quickly as possible. This delay is called the foreperiod and this effect as the foreperiod effects on reaction times. Here we report a new foreperiod effect on the inter-trial phase coherence (ITPC, the degree of alignment in phases from multiple trials) of the electroencephalogram (EEG) evoked by standard stimuli, to which subjects did not to respond, following a warning signal. We call this effect the standard foreperiod (SFP) effect on ITPC.

When foreperiod durations are fixed across a block of trials, reaction times increase with increasing foreperiod duration (Wundt, 1874; Woodrow, 1914). This effect is commonly explained as arising from a reduced precision of temporal expectancy with increasing time, due to the deterioration of accuracy in time estimation for longer time intervals (Grondin, 2001). When foreperiod durations vary randomly from trial to trial, however, reaction times are commonly found to decrease with increasing foreperiod durations (Näätänen, 1970; Woodrow, 1914). This effect is often explained in terms of conditional probabilities, i.e., the probability that the imperative stimulus will occur in a next small time window given that it has not occurred yet. As time passes during a given foreperiod without the impending stimulus having been presented, the conditional probability of its occurrence increases in the remainder of the foreperiod. The cognitive system presumably learns this changing conditional probability early in the experimental session and exploits it to increase temporal expectation. A review on foreperiod effects appears in Niemi and Naatanen (1981).

Electrophysiological correlates of the foreperiod effect have mainly been investigated through the Contingent Negative Variation (CNV, Walter et al., 1964). The CNV is a slow negative shift in the base line of the EEG that develops between the warning signal and the imperative stimulus. Walter et al. (1964) showed that the CNV does not reflect sensory activity, but the contingency of the warning signal and the imperative stimulus; i.e., the probability that imperative stimulus follows the warning signal. If the imperative stimulus is suddenly omitted the CNV amplitude is reduced, and the CNV disappears after 20-50 trials without the imperative stimulus (Low et al., 1966). Its amplitude is significantly elevated when a motor response is required to the imperative stimulus, compared to when no motor response is needed (Walter et al., 1964). The CNV is not discernible in raw EEG records and requires trial averaging (6-12 trials in normal adults). The CNV is generated in the cortex, requiring inputs from the basal ganglia, and involving cerebral networks where the thalamus plays a critical role (Brunia and van Boxtel, 2001). The investigation of the cognitive functions that are reflected on the CNV has a long and rich history. Walter and colleagues [1964] first discussed the CNV as a sign of expectancy. Tecce (1972) postulated attention as a correlate of the CNV. Gaillard (1977, 1978) proposed that the late E wave of CNV may reflect preparation for the motor response. More recent experiments have linked the CNV with explicit (Macar and Vidal, 2003; Pfeuty et al., 2003, 2005) and implicit (Praamstra et al., 2006) time perception.

That the phase of brain oscillation plays an essential role for understanding human behavior is not a recent finding. Early EEG investigations reported that the instant when a subject performs a voluntary hand movement coincides with a specific phase of the alpha oscillation (Bates, 1951). However, in recent years we have witnessed exceptional new findings on the relation between phase and behavior. External visual (Regan, 1966) and auditory (Galambos et al., 1981) rhythmic stimuli entrain brain oscillations (i.e., drag brain oscillations to follow the rhythm of the stimuli), and this entrainment is modulated by attention in such a way that the occurrence of attended stimuli coincides with the phase of brain oscillations of maximal excitability (Lakatos et al., 2005, 2008, 2013; O'Connell et al., 2011; Besle et al., 2011; Gomez-Ramirez et al., 2011; Zion Golumbic et al., 2013; Cravo et al., 2013; Mathewson et al., 2009, 2011,

2012; Spaak et al., 2014; Gray et al., 2015). Alignment of the phase of brain oscillations to optimize performance has been observed in perception, motor control, and cognition. In perception, this alignment has been related to vision (Valera et al., 1981; Busch et al., 2009; Mathewson et al., 2009, 2012; Cravo et al., 2013; Hanslmayr et al., 2013; Spaak et al., 2014; Cravo et al., 2015; Gray et al., 2015; Milton and Pleydell-Pearce, 2016), audition (Rice and Hagstrom, 1989; Lakatos et al., 2008; Stefanics et al., 2010; Henry and Obleser, 2012; Ng et al., 2012; Neuling et al., 2012; Lakatos et al., 2013; Hickok et al., 2015), and speech (Ahissar et al., 2001; Luo and Poeppel, 2007; Howard and Poeppel, 2010; Cogan and Poeppel, 2011; Howard and Poeppel, 2012; Giraud and Poeppel, 2012; Morillon et al., 2012; Gross et al., 2013; Peelle et al., 2013; Luo et al., 2013; Xiang et al., 2013; Doelling et al., 2014; VanRullen et al., 2014; Park et al., 2015; Zoefel and VanRullen, 2015a,b, 2016). In addition, the alignment of phases of oscillations in the visual brain regions can be triggered crossmodally by auditory stimuli, and vice versa (Thorne et al., 2011; Kayser et al., 2008; Lakatos et al., 2009; Romei et al., 2012). In motor control, optimal alignment of brain oscillations has been found in eye movements (Bosman et al., 2009; Hamm et al., 2010; Saleh et al., 2010; Drewes and VanRullen, 2011), and cortico-spinal excitability (van Elswijk et al., 2010; Berger et al., 2014). It has also been ascribed to reaction speed (Lansing, 1957; Callaway and Yeager, 1960; Stefanics et al., 2010; Drewes and VanRullen, 2011; Thorne et al., 2011). In cognition, the alignment of brain oscillations has been linked to attention (Yamagishi et al., 2008; Lakatos et al., 2008, 2009, 2013; Sauseng et al., 2008; Capotosto et al., 2009; VanRullen et al., 2011; Gomez-Ramirez et al., 2011; Zumer et al., 2014; Liu et al., 2014; Mathewson et al., 2014; Gray et al., 2015; van Diepen et al., 2015), working memory (Bonnefond and Jensen, 2012; Myers et al., 2014), causality judgment (Cravo et al., 2015), stimuli coincidence (Milton and Pleydell-Pearce, 2016), temporal predictions (Samaha et al., 2015; Fujioka et al., 2012), and to the transmission of prior information to visual cortex (Sherman et al., 2016). Specially relevant for this manuscript are reports on effects of stimulus expectancy on phase alignment (Cravo et al., 2011, 2013; Stefanics et al., 2010; Zion Golumbic et al., 2013; Mathewson et al., 2012; Milton and Pleydell-Pearce, 2016). The alignment of phase in groups of trials at one brain region, as studied in this manuscript, has been related to the latency of saccadic eye movements (Drewes and VanRullen, 2011), visual contrast sensitivity (Cravo et al., 2013), visual perception (Busch et al., 2009; Mathewson et al., 2012; Spaak et al., 2014), visual attention (Gray et al., 2015), visual stimuli timing (Milton and Pleydell-Pearce, 2016), top-down visual attention (Yamagishi et al., 2008), speech perception (Zion Golumbic et al., 2013), cross-modal interactions (Thorne et al., 2011; Fiebelkorn et al., 2011), as well as to temporal expectation (Cravo et al., 2011; Stefanics et al., 2010). Also, the alignment of phase across brain regions (Hanslmayr et al., 2007), the coupling of phase across frequencies and brain regions (Fiebelkorn et al., 2013; Sauseng et al., 2008; Händel and Haarmeier, 2009), and the coupling between phase and amplitude (Voytek et al., 2010; Bonnefond and Jensen, 2015; Cravo et al., 2011) is predictive of some aspects of behavior. Reviews of the relation between prestimulus phase, perception, behavior, and cognition appear in Schroeder and Lakatos (2009); Mathewson et al. (2011); VanRullen et al. (2011); Thut et al. (2012); VanRullen et al. (2014). In sum, almost every aspect of behavior, perception, and cognition critically depends on the phase of brain oscillations.

Considering that both the foreperiod duration and the phase of EEG oscillations are related to anticipatory attention, we conjectured that the former could be modulating the latter. In addition, because influences of attention on EEG phase activity can be observed in single trials (e.g., Busch and VanRullen, 2010), we hypothesized that modulations of phase activity by the foreperiod duration could also be seen in single trials. In a previous investigation (Makeig et al., 2002), we showed that **ITPC** can be a mechanism responsible for the appearance of event-related potential features in trial-averaged measures of EEG activity. Continuing with this line of investigation, here we study effects of expectancy, as induced by the foreperiod duration, on the **ITPC**. For this, we developed a single-trial multivariate decoding method. We reasoned that if the **SFP** modulates the **ITPC** then we should be able to reliably decode the **SFP** duration (**SFPD**) from the **ITPC** evoked by a standard stimulus. In Section 2.2 we show that there exist

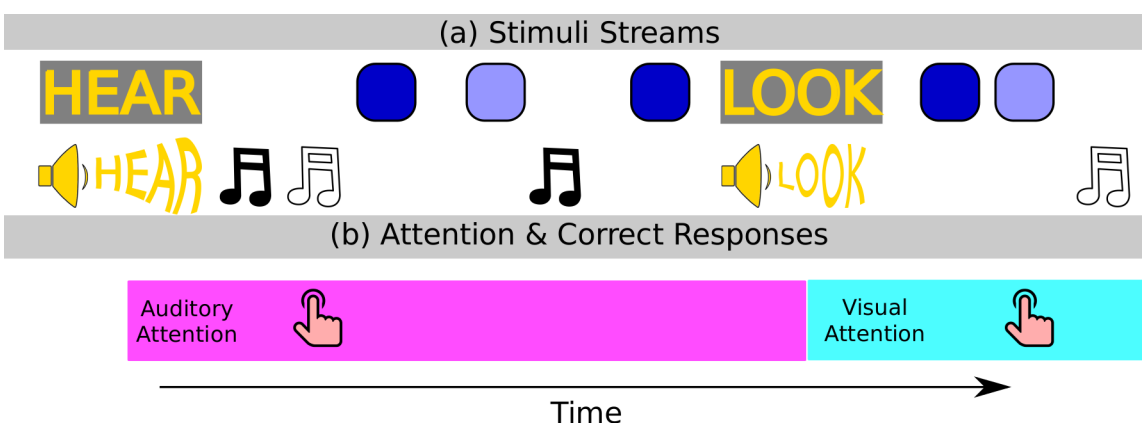

Figure 1: Audio-visual attention-shift experiment. (a) Audio-visual LOOK and HEAR attention-shifting cues, visual standards (dark-blue squares) and deviants (light-blue squares), and auditory standards (low-pitch sounds, filled notes) and deviants (high-pitch sounds, open notes) were presented sequentially in pseudo-random order. (b) After seeing and hearing a LOOK (HEAR) cue, subjects had to indicate with a button press when they saw a visual (heard an auditory) deviant.

1 a significant correlation between the **SFPD** and the **ITPC** evoked by a standard in a single trial. In  
2 principle, this correlation could be an artifact of the decoding method. In Section 2.3 we show that this  
3 is not the case, since the effect of the **SFPD** on **ITPC** can be observed by just comparing the average  
4 **ITPC** of trials closer and further away from the **warning signal**. It could be argued that the **SFP** effect  
5 on **ITPC** is a nuisance in EEG recordings. We argue against this possibility in Section 2.4, by showing  
6 significant correlations between the strength of the **SFP** effect and behavioral measures (detection errors  
7 and reaction speed). In Section 2.5 we study the timing of the **SFP** effect on **ITPC**. We conclude with a  
8 discussion in Section 3.

## 2 Results

10 We characterized the foreperiod effect on **ITPC** in the audio-visual oddball detection task schematized  
11 in Figure 1. Subjects had to detect visual or auditory deviants among visual or auditory standards.  
12 Attention-shifting cues (LOOK and HEAR) were interspersed among the standards and deviants. After  
13 a LOOK (HEAR) cue subjects had to detect visual (auditory) deviants. Thus, the LOOK (HEAR) cue  
14 directed attention to the visual (auditory) **attended modality**. These cues initiated a period of expectancy  
15 for the next deviant stimulus and acted as a **warning signal**. Further details on the experiment appear  
16 in Section 5.1.

17 All analysis were performed at the level of independent components, **ICs**, obtained from an Inde-  
18 pendent component analysis (ICA, Makeig et al., 1996) of the recorded EEG data. Figures 2a and 2b  
19 illustrate the main finding of this study. The thin curves are the cosine of the phase (at the peak **ITC**  
20 frequency, Section A.5.4; 8.15 Hz in this figure) of of the 20 epochs with the shortest (Figure 2a) and  
21 longest (Figure 2b) **SFPD**. These epochs were aligned at time zero to the presentation of attended visual  
22 standards from IC 13 of subject av124a. The thick red curve is the cosine of the average phase across all  
23 epochs (Section A.5.3). Between 150 and 250 ms the phase of the ten epochs with shortest **SFPD** (thin  
24 lines in Figure 2a) are more similar to the average phase (thick line in Figure 2a or in Figure 2b) than  
25 the phase of the ten epochs with longest **SFPD** (thin lines in Figure 2b). This suggests the existence  
26 of a foreperiod effect on **ITPC** where the **SFPD** modulates the similarity between the phase of a given

epoch and the average phase across all epochs. The rest of this paper studies the validity of this effect and investigates its relation with subjects' behavior (detection errors and reaction times).

## 2.1 Behavioral results

We call deviant foreperiod duration to the delay between the presentation of a **warning signal** and the next deviant stimulus. We detected significant foreperiod effects on reaction times (i.e.; significant correlations between deviant foreperiod durations and subjects' reaction times to the corresponding deviant stimuli) in ten combinations of subject and **attended modality** (26% out of a total of 38 combinations of 19 subjects and two **attended modalities**). Five of these combinations corresponded to the visual **attended modality**. These correlations were all positive for the visual **attended modality** (indicating that the longer the deviant foreperiod duration the longer the subject reaction time), while for the auditory **attended modality** there was a mixture of two positive and three negative significant correlations. Figure A.8a plots deviant foreperiod durations as a function of reaction times for an example subject and **attended modality**. We found significant foreperiod effects on detectability (i.e.; significant differences between the median deviant foreperiod duration for hits and misses) in other 10 combinations of subject and **attended modality** (26%). All of these combinations corresponded to the auditory **attended modality** and in all of them subjects detected more easily later deviants (i.e.; the median deviant foreperiod was significantly larger for hits than for misses). Figure A.8b plots deviant foreperiod durations for hits and misses for an example subject and **attended modality**.

Visual deviants were detected more reliably and faster than auditory ones. Mean error rates were 0.22 and 0.09 for detecting auditory and visual stimuli, respectively. A repeated-measures ANOVA, with error rate (in the detection of deviants of the attended modality) as dependent variable and attended modality as independent factor, showed a significant main effect of attended modality ( $F(1, 17)=39.35$ ,  $p<0.0001$ ). A posthoc analysis revealed that error rates were smaller when detecting visual than auditory deviants ( $z=6.45$ ,  $p=5.59e-11$ ). Mean response times to auditory and visual stimuli were 407 and 377 ms, respectively. A repeated-measures ANOVA, with mean response time (to deviant stimuli of the attended modality) as dependent variable and attended modality as independent factor, showed a significant main effect of attended modality ( $F(1, 18)=40.29$ ,  $p<0.0001$ ). A posthoc analysis revealed that mean response time was shorter for visual than auditory deviants ( $z=6.52$ ,  $p=3.49e-11$ ).

## 2.2 Measuring a new foreperiod effect on the ITPC elicited by standards

Since we were interested in studying expectancy effects unrelated to motor preparation, we only characterized the foreperiod effect on **ITPC** for standards, to which subjects were instructed no to respond. Figure 2c shows phase values, at the peak **ITC** frequency (Section A.5.4), in single trials from IC 13 of subject av124a, and for epochs aligned to the presentation of unattended visual standards. Trials are sorted from bottom to top by increasing **SFPD**. The solid line represents the presentation time of the **warning signal**, scaled so that the maximum **SFPD** fits in the negative time period (the maximum, median, and minimum **SFPD** in this panel were 2,424 ms, 1,160 ms, and 328 ms, respectively). The top and bottom insets show magnified views of the phase of the trials with longest and shortest **SFPDs**, respectively. Panels (a) and (b) show the 20 bottommost and topmost trials from panel (c). Apparently, standards with shorter **SFPD** elicit stronger phase coherence from 150 to 250 ms after the presentation of the **warning signal** than standards with longer **SFPD**. Below we use decoding models to assess the validity of this observation.

### av124a13, unattended visual stds

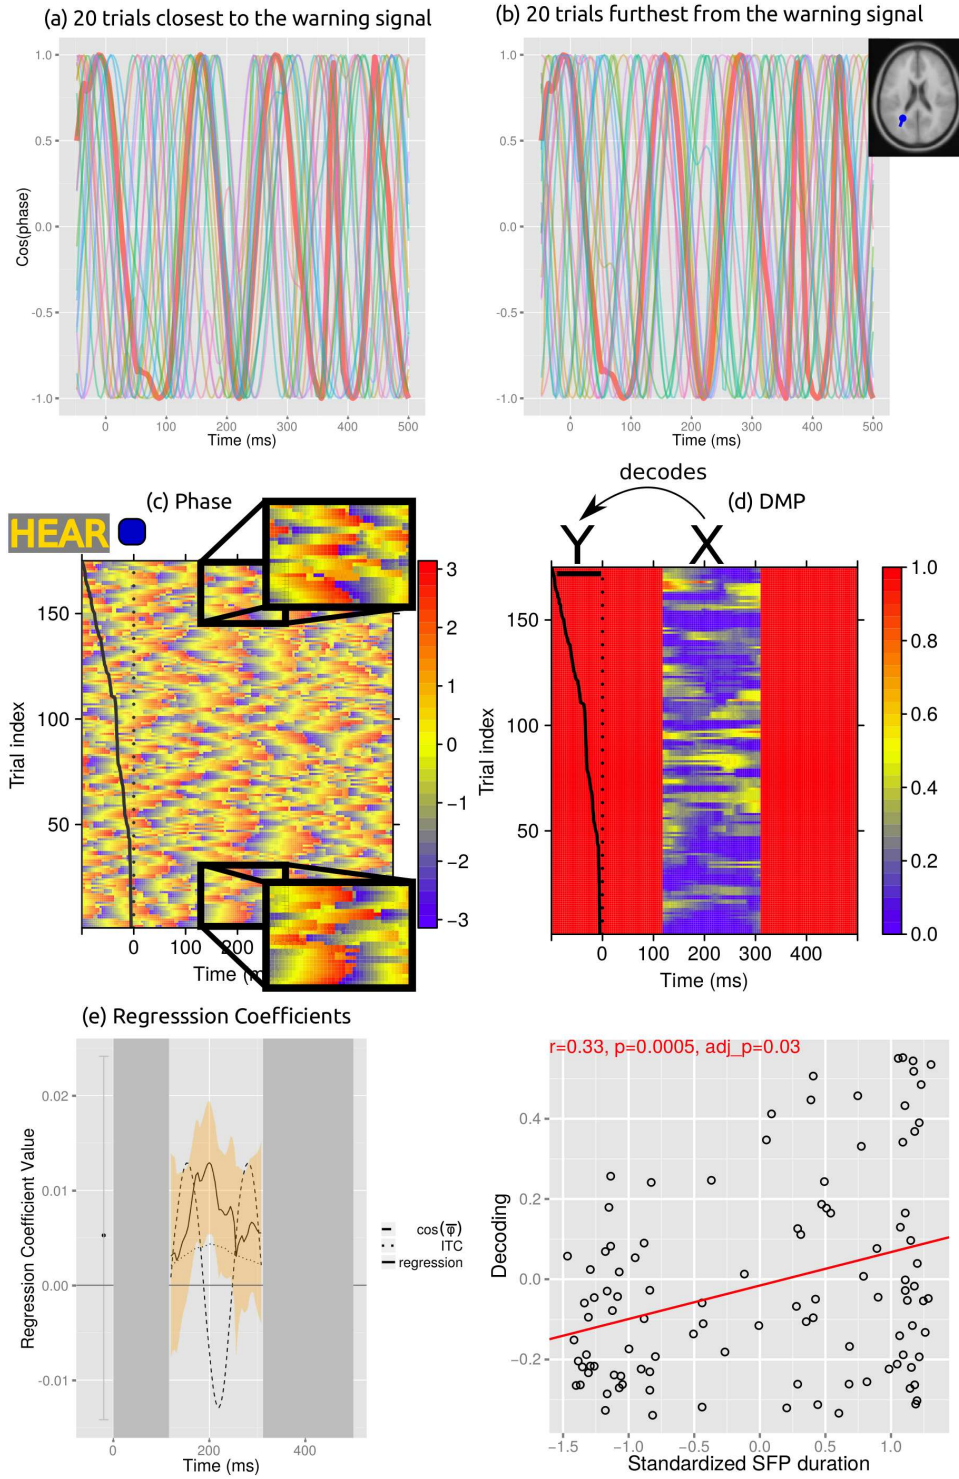



Figure 2: Data used for, and parameters obtained from, the analysis of trials from IC 13 of subject av124a, for epochs aligned to the presentation of unattended visual standards. (a, b) Cosine of the phase of the twenty epochs with the shortest (a) and the longest (b) **SFPD**. Thin curves are the cosines of the phases of individual epochs, and the thick curve is the cosine of the mean phase (i.e., mean direction, Eq. A.6) across all epochs. Between 150 and 250 ms, the phases of epochs with shortest **SFPDs** in (a) are more similar to the mean phase than the phases of epochs with longest **SFPDs** in (b). (c) Phase erpimage. Each horizontal line shows the phase of a single trial. For visualization clarity, the plot has been smoothed across trials using a running median with a window of size three. Time zero (dotted vertical line) corresponds to the presentation of standard visual stimuli. The solid black line indicates the (scaled) times of presentation of the **warning signals** immediately preceding the standards at time zero. Trials are sorted from bottom to top by increasing **SFPD**. Insets magnify phases closest (bottom) and furthest (top) from the **warning signal**. (d) **DMP** erpimage obtained from the phases in (b), smoothed with a running median across trials of size 5. Solid red regions correspond to time points where the distribution of phases across trials was not significantly different from the uniform distribution ( $p > 0.01$ , Rayleigh test). (e) The solid line plots the coefficients of the linear regression model used to decode the **SFPD** ( $y$  in panel (b)) from the corresponding **DMP** values ( $x$  in panel (b)) of single trials. The orange band gives 95% bootstrap confidence intervals of the estimated coefficients (Section A.5.14). The dashed line at time  $t$  plots the mean phase at time  $t$  across all trials. The dotted line is the **ITC** curve (Section A.5.4). (f) Scatter plot of model decodings versus standardized **SFPDs**.

To study if the **SFPD** modulates the **ITPC** evoked by standards, we attempted to decode the former from the latter. Reliable decodings would indicate that the **SFPD** is correlated with the **ITPC** evoked by standards. We used the Deviation from the Mean Phase (**DMP**) to quantify **ITPC** in single trials (Section 5.4). Figure 2d shows **DMP** values computed from the phase values in Figure 2c. Time points at which there was not enough statistical evidence to conclude that the phase distribution across different trials was statistically different from the uniform distribution ( $p > 0.01$ , Rayleigh test) are masked in red. We did not use these points to decode the **SFPD**, for a reason explained in Section 5.4. For each epoch, we decoded the **SFPD** of the standard presented at time zero from a 500 ms-long window of **DMP** values following the presentation of this standard. To avoid possible EEG movement artifacts induced by responses to deviants, we excluded from the analysis trials with deviant stimuli in this 500-ms-long window. We used a linear regression model for decoding (Section A.5.7), and estimated its parameters using a variational-Bayes method (Section A.5.8). To each estimated model corresponds a **standard modality** (i.e., the modality of the standards used to align the epochs from which the model parameters were estimated; visual **standard modality** in Figure A.5.10) and an **attended modality** (i.e., the modality that was attended when the epochs used to estimate the model parameters were recorded; auditory **attended modality** in Figure A.5.10).

If the delay between the **warning signal** and the following deviant is longer than a threshold, that depends on the distribution of deviants, the foreperiod effect on reaction times disappears (Botwinick and Brinley, 1962). Similarly, if we estimate decoding models including a large proportion of standards presented long after the **warning signal**, decodings become non-significant (i.e., the **SFP** effect on **ITPC** disappears). To fit decoding models we used data from standards that were presented before a maximum **SFP** duration after the **warning signal**. The selection of this maximum is described in Section A.4.

The coefficients of the linear regression model estimated from the **SFPDs** and **DMP** values in Figure 2d are shown in Figure 2e. The leave-one-cross-validated decodings from the linear regression model are plotted as a function of **SFPD** in Figure 2f. To assess the accuracy of these decodings we calculated their robust correlation coefficient with the **SFPDs** (Section A.5.10). We obtained a correlation coefficient

1 cient  $r=0.33$ , which was significantly different from zero ( $p=0.0005$ , permutation test for skipped Pearson  
2 correlation coefficient; adjusted  $p$ -value for multiple comparisons  $\text{adj}_p=0.03$ , Section A.5.9). This signifi-  
3 cance, and the fact that the estimated regression model was significantly different from the intercept-only  
4 model ( $p<0.01$ , likelihood-ratio permutation test, Section A.5.14), suggests that the **SFPD** is significantly  
5 correlated with the **ITPC** activity evoked by unattended visual standards in **IC** 13 of subject av124a.

6 To characterize the **SFP** effect on **ITPC** across subjects we grouped all **ICs** of all subjects using a  
7 clustering algorithm (Section A.5.2). Figure 3 shows the obtained clusters and Table A.3 provides addi-  
8 tional information about them. To quantify the strength of the standard foreperiod effect on **ITPC** at  
9 a given cluster, **standard modality**, and **attended modality**, we computed the proportion of models with  
10 decodings significantly correlated with experimental **SFPDs**, as in Figure 2f. Dots below the image of a  
11 cluster in Figure 3 indicate that the decodings of more than 40% of the models, estimated from phase  
12 activity in that cluster and from the **standard modality** and **attended modality** given by the color of the  
13 dot, were significantly correlated with experimental **SFPDs**. For each cluster, **standard modality**, and  
14 **attended modality**, the number of models with significant correlations with the **SFPDs**, as well as the  
15 proportion of such models over the total number of models estimated for the cluster, **standard modality**,  
16 and **attended modality**, are given in Table A.4. The larger number of clusters with more than 40%  
17 significant correlations for the visual than the auditory modality (red vs. blue points) and for attended  
18 than unattended standards (darker vs. lighter colors) hints that the **SFP** effect on **ITPC** is stronger  
19 for the visual than the auditory modality, and for attended than unattended standards. For the visual  
20 **standard modality**, clusters where the decoding of more than 40% of models were significantly correlated  
21 with **SFPDs** are localized in parieto-occipital regions, while for the auditory **standard modality** these clus-  
22 ters are found on fronto-central brain regions, suggesting that the **SFP** effect on **ITPC** is somatotopically  
23 organized.

24 From the successful decodings of **SFPDs** from **ITPC** activity triggered by standards, we infer that the  
25 **SFPD** is modulating the **ITPC**. However, other events, such as the **warning signal**, could be modulating  
26 this **ITPC**. We argue against this possibility in Section A.1.

## 27 2.3 Direct evidence for the **SFP** effect on **ITPC**

28 In the previous section we used linear regression models to decode **SFPDs** from **ITPC** activity following  
29 the presentation of standards. Since these decodings were reliable, we inferred that the **SFPD** is correlated  
30 with the **ITPC** activity triggered by standards. Here we use a simple method to gain more direct evidence  
31 of the existence of this correlation.

32 We compared the averaged phase decoherence of trials with the shortest and the longest **SFPDs**. The  
33 existence of a significant difference in these values would be direct evidence for the **SFP** effect on **ITPC**.  
34 To measure phase decoherence in a group of trials, we computed the mean **DMP** of the trials in the  
35 group. Section A.5.6 proves that, at times of high phase coherence, the mean **DMP** is related to the  
36 **ITC**, a standard measure of averaged **ITPC**. The red and blue lines in the top row of Figure 4 plot the  
37 mean **DMP** of the 20% trials furthest from and closest to the **warning signal**, respectively. Panels in the  
38 middle row plot the difference between the red and blue lines in the corresponding panels of the top row.  
39 Plots in different columns correspond to phase activity extracted from different subjects, **ICs** in the left  
40 parieto-occipital cluster 04, and attended visual stimuli. For subject av124a and **IC** 07 (left column),  
41 the mean **DMP** was significantly larger for trials with the longest **SFPD** between 0 and 100 ms after the  
42 presentation of standard stimuli, but smaller between 200 and 320 ms (Figures 4a and 4d). Differently,  
43 for subject av115a and **IC** 4 (central column), the mean phase decoherence was significantly larger for  
44 trials with the longest **SFPD** between 200 and 400 ms (Figures 4b and 4e). And for subject av113a and  
45 **IC** 17 (right column), the mean phase decoherence was significantly larger for trials with the longest  
46 **SFPD** between 0 and 250 ms (Figures 4c and 4f).

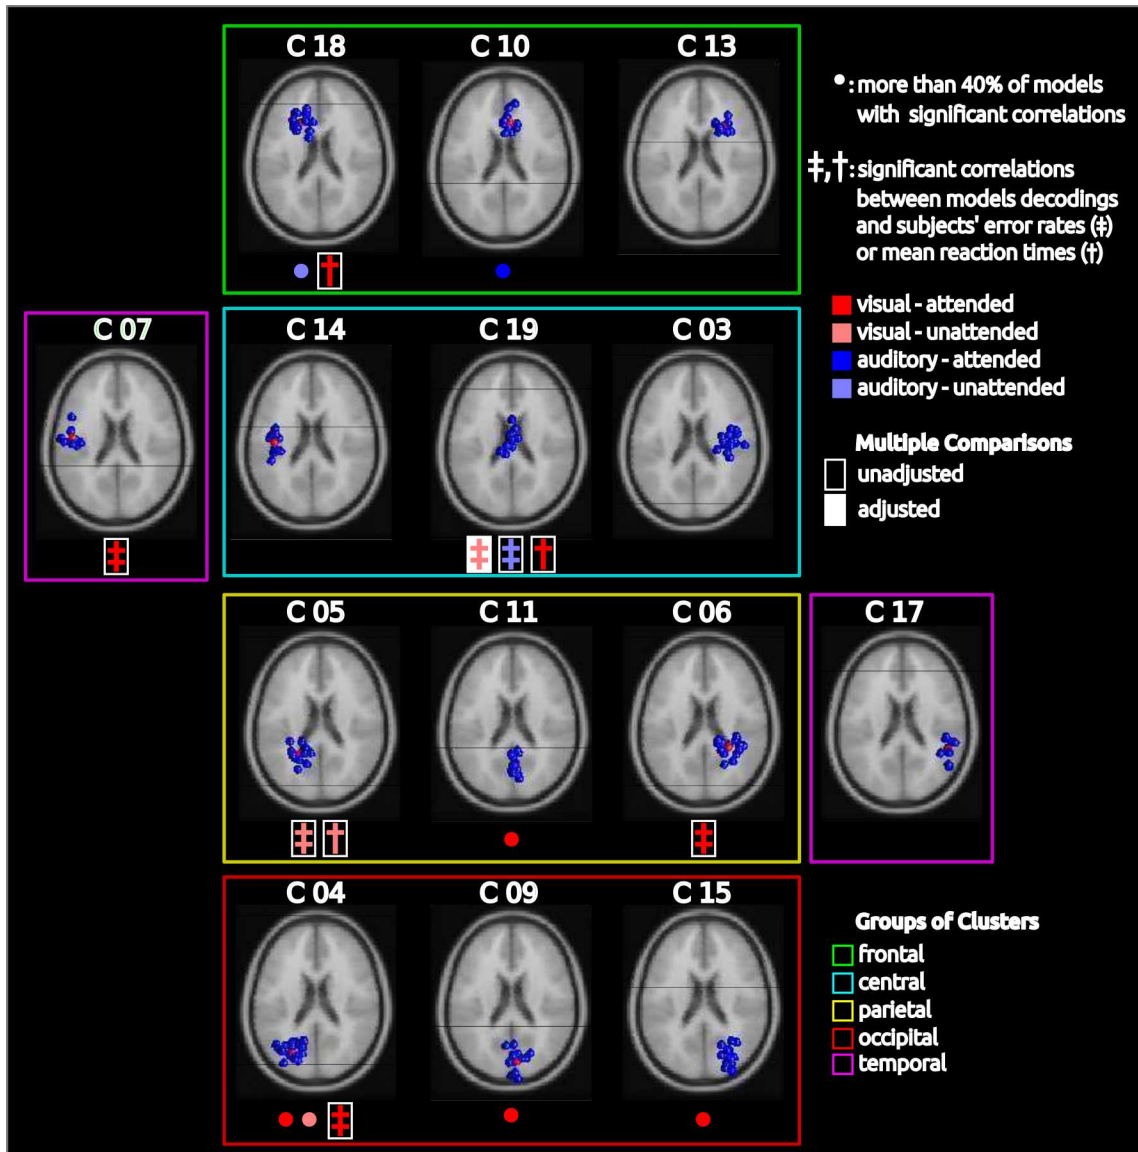

Figure 3: Clusters of ICs, large proportions of significant models, correlations with behavior, and groups of clusters. A blue ball inside a brain slice represents an IC from one subject. Each brain slice displays one cluster of ICs. A colored dot below the image of a cluster indicates that in more than 40% of the models estimated from data from that cluster, and from the **standard modality** and the **attended modality** given by the color of the dot, the correlation coefficient between models' decoding and SFPDs was significantly different from zero ( $p_{adj} < 0.05$ , Section A.5.9). A dagger (double dagger) signals a significant correlation between models' decoding power and subjects' mean reaction times (error rates). Filled (unfilled) rectangles behind daggers indicate that the significance of the corresponding correlation test was corrected (uncorrected) for multiple comparisons. Colored boxes mark groups of clusters used in Section 2.5 to study the timing of the SFP effect on ITPC. The clusters with a large proportion of significant models suggest that the SFP effect on ITPC is stronger for visual than auditory standards and for attended than unattended standards, and that the effect is somatotopically organized (see text). The significant correlations between the strength of the SFP effect on ITPC and subjects' behavioral performance show that the effect is behaviorally relevant.

1 The linear regression method is statistically more powerful than the the simple method for testing  
2 the association between the **SFPD** and the **ITPC** activity triggered by standards, since it uses all trials  
3 in a statistically optimal way, and not just extreme trials in an ad-hoc manner. Another advantage  
4 of the linear regression method, compared with more general function approximation methods, such  
5 as artificial neural networks, is that the regression coefficients are readily interpretable. A positive  
6 regression coefficient indicates that trials with longer **SFPD** correspond to larger values of **DMP**, or  
7 larger decoherence, at the time of the regression coefficient, compared to trials with shorter **SFPDs**. This  
8 is because to decode a long **SFPD** a positive regression coefficient needs to be multiplied by a large **DMP**  
9 value (assuming that the remaining regression coefficients are kept fixed). Similarly, a negative regression  
10 coefficient implies that trials with longer **SFPD** correspond to smaller phase decoherence, at the time of  
11 the regression coefficient. To validate this interpretation, and the soundness of the decoding methodology,  
12 the bottom row in Figure 4 plots the regression coefficients of the decoding models corresponding to  
13 the top rows. Figure 4g shows significantly positive regression coefficients between 100 and 200 ms  
14 and significantly negative coefficients between 240 and 300 ms. Therefore, according to the previous  
15 interpretation, trials with longer **SFPDs** should correspond to more decoherent activity between 100-  
16 200 ms and to less decoherent activity between 240 and 300 ms. And this is what we observed in  
17 Figures 4a and 4d. Similar consistencies hold for the other columns. The normalized crosscorrelation  
18 (Section A.5.14) between the difference in averaged **DMP** (middle row in Figure 4) and the corresponding  
19 regression coefficients (bottom row of Figure 4) was 0.80 for (d)-(g), 0.39 for (e)-(h), and 0.38 for (f)-  
20 (i). Across all models significantly different from the intercept-only model, the first, second (median),  
21 and third quartiles of the normalized crosscorrelation distribution were 0.40, 0.71 and 0.87, respectively.  
22 These results indicate that on average regression coefficients were similar to differences in average **DMP**,  
23 validate the previous interpretation of regression coefficients, and support the inference that reliable  
24 decodings by the regression models indicate modulations of **ITPC** by the **SFPD**.

## 2.4 The SFP effect on ITPC is correlated with subjects' behavior

25 In the previous sections we presented evidence suggesting that the **SFPD** influences the **ITPC** evoked by  
26 standards. Here we show that this is a relevant effect, since its strength is correlated with subjects' error  
27 rates and mean reaction times.

28 The ordinate in Figure 5a gives the correlation coefficient between decodings from a model and  
29 experimental **SFPDs**, for all subjects with an **IC** in the central-midline cluster 19 and unattended visual  
30 standards. The abscissa provides subjects' error rates. The significant negative correlation between  
31 models' decoding accuracies and subjects' error rates ( $r=-0.91$ ,  $p=0.0004$ ,  $\text{adj}_p=0.05$ ) shows that the  
32 higher is the association between **SFPD** and **ITPC** in a subject, the better is his or her behavioral  
33 performance (error rate). Figure 5b is as Figure 5a, but for attended visual standards and the left parieto-  
34 occipital cluster 04. We also found significant correlations between the decoding accuracy of models and  
35 subjects mean reaction times, as illustrated in Figures 5c and 5d. Points marked in green in these figures  
36 represent outliers detected in the calculation of robust correlation coefficients (Section A.5.10). Note that  
37 the decoding models were optimized to decode **SFPDs**. These significant correlations resulted without  
38 fitting the decoding models to behavioral data.

39 A colored double and simple dagger below the image of a cluster in Figure 3 indicates a significant  
40 correlation between the decoding accuracy of models estimated from phase activity in the cluster and  
41 subjects error rates and mean reaction times, respectively. The color of the dagger corresponds to  
42 the **standard modality** and the **attended modality** of the data used to estimate the models' parameters.  
43 Table A.5 shows the correlation coefficients, and corresponding p-values, between the decoding accuracy  
44 of models and subjects error rates. Table A.6 is as Table A.5, but for mean reaction times. All significant  
45 correlations between model's decoding accuracies and subject's error rates were negative (Table A.5),  
46

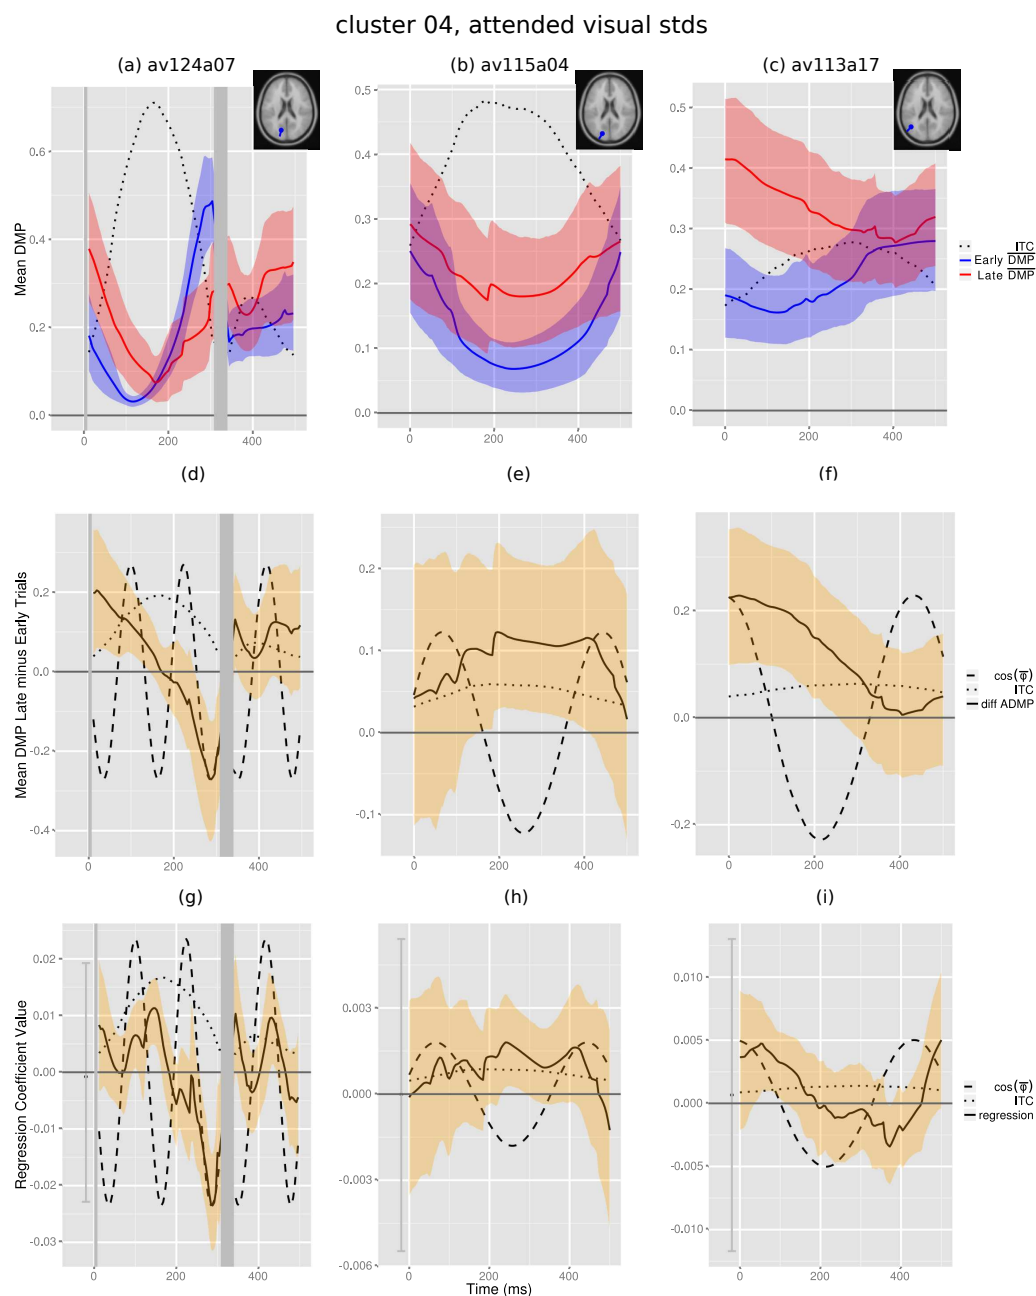

Figure 4: Relation between differences in phase coherence in trials furthest from and closest to the **warning signal** and regression models' coefficients. Top row: averaged **DMP** evoked by the 20% standards closest to (blue curve) and furthest from (red curve) the **warning signal**. The dotted line plots the **ITC** computed from all trials. Middle row: the solid line plots the difference in averaged **DMP** evoked by trials furthest from minus closest to the **warning signal** (i.e., the red minus the blue curves in the top row). Bottom row: standardized coefficients of regression models. Colored bands in all panels represent 95% confidence intervals. The dotted and dashed lines in the panels of the middle and bottom rows plot the arbitrarily scaled **ITC** and the cosine of the mean phase from all trials, respectively. The top and middle rows demonstrate that **ITPC** depends on the **SFPD**, and the similarity between the middle and bottom rows show that the coefficients of a regression model indicate whether standards further from the **warning signal** evoke more coherence or decoherent activity than standards closer to it.

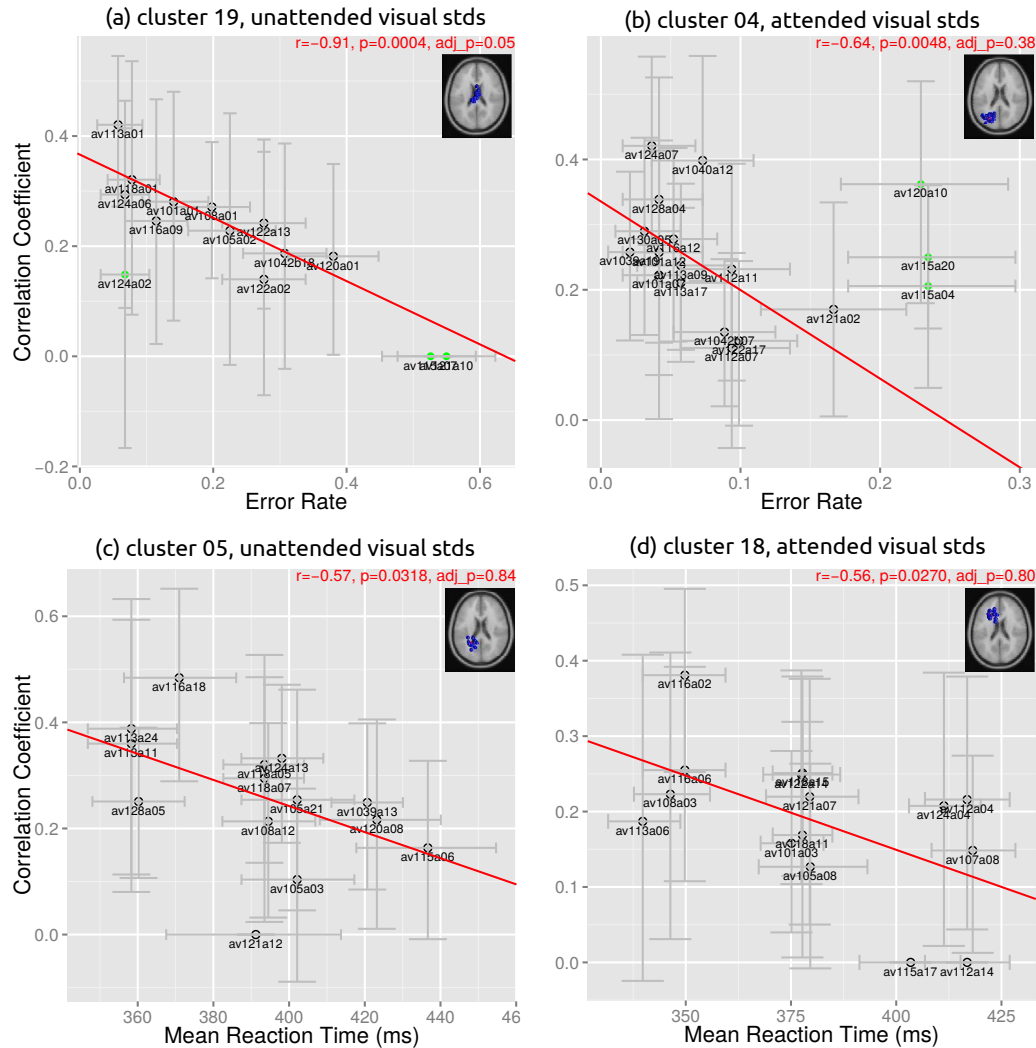

Figure 5: The strength of **SFP** effect on **ITPC** (i.e., the accuracy of the decoding models) is related to subjects' behavior (error rates in (a,b) and mean reaction times in (c,d)), attesting the behavioral relevance of the **SFP** effect on **ITPC**. Larger decoding accuracy (i.e., larger correlation coefficients between models decodings and **SFPDs**; ordinate in all panels) corresponds to lower error rates (abscissa in (a,b)), as indicated by negative correlation coefficients,  $r$ , in (a,b), and this correspondence is stronger in models estimated from phase activity triggered by unattended standards (e.g.,  $|r|$  is larger in (b) than in (a)). Larger decoding accuracy seems to correspond to faster (slower) mean reaction times (abscissa in (c,d)) in models estimated from phase activity triggered by attended (unattended) standards (e.g.,  $r$  in (c) and (d) is negative and positive, respectively), but this correspondence is not as conclusive as for error rates (see text).

1 indicating that the larger the detection performance of a subject, the larger the strength of the **SFP** effect  
2 on **ITPC**. The absolute value of these correlations was larger for attended than unattended standards  
3 ( $p < 1e-04$ ; permutation test). For mean reaction times, the three significant correlations were also negative  
4 (Table A.6), showing that subjects with strongest **SFP** effect on **ITPC** reacted the slowest. However,  
5 differently from error rates, positive correlation for mean reaction times almost reach significance (e.g.,  
6 cluster 06 and unattended auditory standards, or cluster 13 and unattended visual standards, Table A.6).  
7 Correlations (both significant and non-significant) were stronger for error rates than for mean reaction  
8 times and stronger for the visual than the auditory **standard modality**. An ANOVA with the absolute  
9 value of the correlation coefficient as dependent variable showed significant main effects of behavioral  
10 measure type (i.e., error rate or mean reaction time;  $F(1, 109)=7.26$ ,  $p=0.0082$ ) and for **standard modality**  
11 ( $F(1, 109)=8.22$ ,  $p=0.005$ ). A posthoc analysis indicated that the mean absolute value of the correlation  
12 coefficient was larger for error rates than for mean reaction times ( $p=0.005$ ; Tukey test) and larger for  
13 the visual than the auditory **standard modality** ( $p=0.0082$ ; Tukey test). Further information on this  
14 ANOVA appears in Section A.5.12.

15 The above correlations with error rates, although significantly different from zero at the 0.05 con-  
16 fidence level for univariate hypothesis tests, were found after computing a total of 56 correlations  
17 (14 clusters  $\times$  2 **standard modalities**  $\times$  2 **attended modalities**). Due to the multiple-comparison prob-  
18 lem (Westfall and Young, 1993) the probability that at least one of these correlations was found signif-  
19 icant while there was no association between subjects' error rates and models' decoding accuracies is  
20 very large ( $p \simeq 0.94$ ). Only the correlation for the central cluster 19 and unattended visual standards  
21 (Figure 5a) remained significant after adjusting for multiple comparisons using the resampling procedure  
22 described in Section A.5.9. It is thus highly probable that some of the five unadjusted significant corre-  
23 lations with error rates that did not survive the multiple comparison test occurred by chance. However,  
24 note that, as expected, all of these correlations were negative, which is a very rare event under the as-  
25 sumption that all of these correlations occurred by chance (i.e., the probability of finding five negative  
26 correlations assuming equal probability for positive and negative correlations is  $p = 0.5^5 = 0.03$ ). Thus,  
27 not all of the five unadjusted significant correlations that did not survive the multiple comparison ad-  
28 justment may have occurred by chance. None of the correlations with mean reaction times survived the  
29 multiple comparisons adjustment. Nonetheless, since the brain regions were these unadjusted significant  
30 correlations occurred have been previously connected to foreperiod effect on reaction times, as we discuss  
31 below, it is possible that not all these correlations occurred by chance.

## 32 2.5 Timing of the SFP effect on ITPC

33 In Section 2.3 we advanced an interpretation of the coefficients of the decoding model, and used a simple  
34 trial averaging procedure to verify that this interpretation was sound. As shown in Figures 2e and 4d-f,  
35 modulations of **ITPC** by the **SFPD**, as represented by the coefficients of decoding models, are not constant  
36 in time, but fluctuate in an oscillatory manner. In the 500 ms window following the presentation of a  
37 standard, these coefficients displayed one or more peaks, as in Figures 2e and 4g-h, respectively. Details  
38 on the identification of these peaks are given in Section A.5.13. The time of the largest peak corresponds  
39 to the latency after the presentation of standards where modulations of **ITPC** by the **SFPD** are strongest.  
40 In this section we use this time to represent the timing of the **SFP** effect on **ITPC**, and study how this  
41 timing varies across brain regions, **standard modalities**, and **attended modalities**.

42 The median time of the largest peak of the decoding model coefficients was 292 ms, with a 95%  
43 confidence interval of [284, 300] ms. We grouped the clusters of **ICs** into five groups, as indicated in  
44 Figure 3, and examined the mean time of the largest peak for each group of clusters and **attended modality**  
45 (Figure 6a), and for each group of clusters and **standard modality** (Figure 6b). We found that peaks  
46 occurred earlier when attention was oriented to the auditory than to the visual modality (Figure 6a).

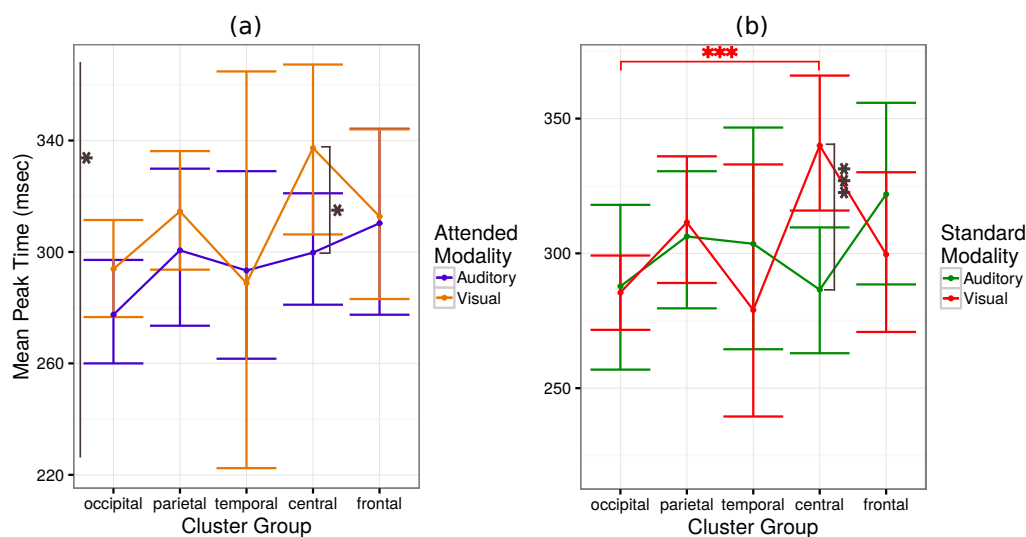

Figure 6: Timing of the **SFP** effect on **ITPC**. (a) Mean coefficients peak times for models corresponding to the auditory (blue points) and visual (orange points) **attended modality**, as a function of group of clusters. On average, when attending to the audition, the **SFP** effect on **ITPC** occurred earlier than when attending to vision. (b) Mean coefficients peak times for models corresponding to the auditory (green points) and visual (red points) **standard modality**, as a function of group of clusters. On average, for visual standards, the **SFP** effect on **ITPC** occurred earlier in the occipital than in central brain regions. The effect was most strongly modulated over the central brain region by both the **attended modality** (panel (a)) and by the **standard modality** (panel (b)).

This modulation by attention was strongest at the central group of clusters, where the peak of the models' coefficients occurred earlier for auditory than visual standards (Figure 6b). Therefore, the timing of the **SFP** effect on **ITPC** was most strongly modulated, by the **attended modality** and by the **standard modality**, at central brain regions. In addition, for visual standards, the **SFP** effect on **ITPC** occurred earlier at occipital than central brain regions (Figure 6b).

A first ANOVA, using data from all models significantly different from the intercept only model ( $p < 0.01$ ; likelihood-ratio permutation test, Section A.5.14), with time of the largest peak of the coefficients as dependent variable, found a significant main effect of **attended modality** ( $F(1,230)=4.259$ ,  $p=0.0402$ ). A posthoc test showed that the peak occurred earlier for the auditory than the visual **attended modalities** ( $z=1842$ ,  $p=0.0327$ ; black asterisk to the left of Figure 6a). A second ANOVA restricted to models corresponding to the visual **standard modality** found a significant main effects of group of clusters ( $F(4,135)=4.4073$ ). A posthoc analysis revealed that the peak was earlier for the occipital than the central group of clusters ( $z=4.163$ ,  $p=3.14e-05$ ; red asterisks in Figure 6b). A third ANOVA restricted to models corresponding to the central group of clusters found significant main effects of **attended modality** ( $F(1,43)=4.5061$ ,  $p=0.0396$ ) and of **standard modality** ( $F(1,43)=14.2173$ ,  $p=0.0005$ ). A posthoc analysis showed that the peak was earlier when attention was oriented to the auditory than visual modality ( $z=2.178$ ,  $p=0.029360$ ; black asterisk next to *Central* in Figure 6a) and earlier for auditory than visual standards ( $z=3.406$ ,  $p=0.000659$ ; black asterisks in Figure 6b).



### 3 Discussion

Here we reported a new foreperiod effect on the **ITPC** activity triggered by standards. We demonstrated that, when visual or auditory standards are preceded by a warning signal (Figure 1), **ITPC** is modulated by the delay between the warning signal and the standards (Figures 2, clusters with a colored dot in Figure 3, and blue entries in Table A.4). We used a decoding method to detect the new foreperiod effect. We demonstrated that this effect is not an artifact of the decoding method, since it can be observed using simple trial averages (Figure 4). Importantly, the strength of the new foreperiod effect (i.e.; the accuracy in decoding the **SFPD** from the phase activity elicited by a standard) is correlated with subjects' detection performance and reaction speed (example and summary of correlations with detection performance in Figures 5a and 5b, clusters with a double dagger in Figure 3, and blue entries in Table A.5; with reaction speed in Figures 5c and 5d, clusters with a dagger in Figure 3, and blue entries in Table A.6). The effect occurred earlier when attention was oriented to the auditory modality (Figure 6a), for visual standards it happened earlier at occipital than in central brain regions (Figure 6b), and modulations of the timing of the effect by the **attended modality** or by the **standard modality** was stronger over a central brain regions (Figures 6a and 6b).

Phase coherence has been used to describe the synchrony between different recording electrodes (e.g., Lachaux et al., 1999; Hanslmayr et al., 2007) or, as in this study, to characterize the alignment of phases across multiple trials at a single site (e.g., Busch et al., 2009; Thorne et al., 2011; Cravo et al., 2015). Previous measures of phase alignment at a single site were the result of averaging data across multiple trials. However, phase coherence may vary from trial to trial, and important information could be lost in trial averages. We have previously proposed the ERP image plot, a useful visualization of trial-by-trial consistencies in a set of event-related data trials (Makeig et al., 2004; Delorme et al., 2015). To build this plot, trials are first sorted in order of a relevant data or external variable and then plotted as a color-coded two-dimensional image, as in Figure 2c. ERP image plots have proven useful in revealing trial-to-trial consistencies otherwise hidden in trial averages (Makeig et al., 1999; Jung et al., 2001; Delorme et al., 2007; Onton and Makeig, 2009). However, methods are lacking to establish the statistical significance of apparent features in these plots. Here we used a multivariate linear regression model to assess the significance of the observation, from the ERP image in Figure 2c, that the **ITPC** evoked by standards was modulated by the **SFPD**. We thus found a new foreperiod effect on the single-trial **ITPC** triggered by standards. Importantly, this effect would have been lost if we had indiscriminately averaged phases across all trials.

The fact that models accurately decoded the **SFP** duration from the **ITPC** triggered by standard stimuli does not necessarily mean that these two quantities are correlated with each other. In principle, a sufficiently complex model can decode arbitrarily accurately any experimental variable from any physiological measurements, if the complex model overfitted the data (Geman et al., 1992). To avoid overfitting we used leave-one-out crossvalidation to generate model decodings. To further validate that the obtained results were not an artifact of our decoding method, we showed that similar modulations of **ITPC** were obtained by a simple trial averaging procedure (Section 2.3). In addition, we developed surrogate controls to further support the hypothesis that (1) the **SFP** duration is the experimental variable causing the **SFP** effect on **ITPC** and (2) the **ITPC** triggered by standards is the aspect of brain activity modulated by the **SFP** effect on **ITPC** (Section A.1). Further evidence for the reliability of our results comes from the significant correlations between the decoding power of the models and subjects behavioral measures (Section 2.4) and from the anatomical specificity of the clusters with a large proportion of significant models (Section 2.2).

### 3.1 What psychophysical processes generate the SFP effect on ITPC?

The current investigation suggests that temporal expectancy plays an important role in the generation of the SFP effect on ITPC, although further investigations are needed to validate this suggestion, as discussed below. First, the strongly periodic stimulation in our experiment should have induced temporal expectations in subjects. This claim is supported by the observation of reliable foreperiod effects on reaction times in 26% of the subjects and attended modalities (Section 2.1) and by previous arguments relating the foreperiod effect on reaction times to expectancy (e.g., Niemi and Naatanen, 1981). Second, temporal expectations contribute to faster reaction times and improved perception (e.g., Correa, 2010), while the strength of the SFP effect on ITPC was larger in subjects achieving larger detection rates and faster mean reaction times (Figure 5 and Tables A.6 and A.5). Third, although it is possible to develop temporal expectancies for unattended stimuli, these expectancies are stronger for attended stimuli. Hence, the strength of the foreperiod effect on ITPC should be larger for attended than unattended stimuli (part II of this manuscript). Fourth, as we discuss in the next section, most of the brain regions where we observed significant correlations between the strength of the SFP effect on ITPC and behavioral measures, have been implicated in temporal expectation.

An unresolved question in the field of temporal expectation is whether it affects motor (i.e., rate of motor response), premotor (i.e., response preparation), perceptual (i.e., buildup of information about the stimulus), or executive (i.e., decision mechanism) stages. The majority of the evidence suggests a motor influence (e.g., Sanders, 1998; Brumia and Boelhouwer, 1988; Coull and Nobre, 1998), premotor effects have also been reported (e.g., Bausenhardt et al., 2006; Hackley and Valle-Inclan, 1999; Müller-Gethmann et al., 2003), and more recent studies have shown influences on perceptual (e.g., Correa et al., 2005; Mento et al., 2013; Lange, 2009; Rolke, 2008) and executive (e.g., Naccache et al., 2002; Correa et al., 2010) functions. Results from the current study suggest that the aspect of temporal expectation measured by the SFP effect on ITPC mostly affects high-order visual processing. That the strength of the SFP effect on ITPC is significantly correlated with stimuli detectability (Figure 5a, and 5b and Table A.5) and that the SFP effect on ITPC is calculated from EEG activity triggered by standard stimuli to which subjects did not respond, indicates that the temporal expectation measured by the SFP effect on ITPC affects non-motor activity. Also, the long latencies after the presentation of standards at which modulations of the SFP were largest (the median time of the largest peak of the regression coefficients was 292 ms, Section 2.5) argues against a relation between the temporal expectation measured by SFP effect on ITPC and early sensory stages. Lastly, that the SFP effect on ITPC was substantially stronger for the visual than for the auditory standard modality (as indicated in Section 2.2, Figure 3, and Table A.6, the number of clusters with a large proportion of models significantly different from the intercept-only models was larger for the visual standard modality and, as shown in Section 2.4, Figure 3, and Tables A.6 and A.5, the number of clusters showing significant correlations between models' decodings and behavioral measures, as well as the strength of these correlations, was larger for the visual than the auditory standard modality) suggests that the effects of the temporal expectation measured by the new foreperiod effect may be specific to the visual modality. Note, however, that the weakness of the SFP effect on ITPC on the auditory modality could be due to the fact that our 32-channel EEG recording system may not have covered auditory brain regions with sufficient density.

### 3.2 Relations to previous investigations

Previous investigations have shown that brain regions associated with clusters whose ITPC activity is significantly correlated with detection performance (colored cells in Table A.5) or with reaction speed (colored cells in Table A.6) are related to temporal expectancy, as discussed next.

Electrophysiological correlates of temporal expectation generated by the foreperiod effect have mainly

1 been investigated through the CNV. Studies demonstrating that the CNV amplitude is maximal at the  
2 vertex (Walter, 1967), that the the supplementary motor area (SMA) and the anterior cingulate cortex  
3 (ACC) are the sources of the CNV's O wave (Cui et al., 2000; Zappoli et al., 2000; Gomez et al., 2001),  
4 and that the premotor cortex appears to give rise to the CNV's E wave (Hultin et al., 1996), indicate the  
5 central brain region associated with cluster 19 is related to attention orienting and response preparation.  
6 Also, more recent studies have shown that posterior sites contribute to the generation of the E wave  
7 of the CNV (Gomez et al., 2001, 2003). Of particular interest are the asymmetric activations in the  
8 left middle-occipital cortex observed by Gomez et al. (2003, Figures 2 and 3). These studies suggest  
9 that activity in the left parieto-occipital region associated to cluster 04 (Figure A.9) may be related to  
10 perceptual anticipation.

11 Findings from a CNV study focused on attention in time by Miniussi et al. (1999) are in close agree-  
12 ment with results reported here. In this study subjects were instructed to detect a target stimulus as  
13 quickly as possible. Two central cues which predicted if the subsequent target would occur 600 or 1400  
14 ms after cue onset. Their analysis showed that the influence of the foreperiod duration on event-related  
15 potentials elicited by the cue changed over time. The earliest significant influence appeared 280 ms post-  
16 cue and occurred in left-parieto-occipital electrodes, and by 480 ms post-cue this difference has moved  
17 to the vertex (Figure 7 in Miniussi et al., 1999). Thus, the significant correlation between the strength  
18 the SFP effect on ITPC and error rates observed in the left-parieto-occipital cluster 04 and the central-  
19 midline cluster 19 (Figure A.9) agrees with the significant influences observed in Miniussi et al. (1999)  
20 in left-parieto-occipital and vertex electrodes. In addition, the observation that the SFP effect on ITPC  
21 occurred earlier in occipital than in central clusters (Figure 6b) agrees with the finding by Miniussi et al.  
22 (1999) that significant foreperiod influences appeared earlier in left-parieto-occipital electrodes than in  
23 electrodes surrounding the vertex.

24 Fixed temporal expectations of when an event is likely to occur are marked by activity in left premotor  
25 and parietal areas. However, if the event has still not appeared by the expected delay, the right prefrontal  
26 cortex updates current temporal expectations (Coull, 2009). The left prefrontal cluster 18 and left  
27 parietal cluster 5 (Figure A.9) may be related to correspondingly left-lateralized fMRI activations in  
28 attention on time tasks (e.g., Coull and Nobre, 1998). Updates of temporal expectations occurred in  
29 the present study, since it used variable foreperiod durations. Previous lesion (Vallesi et al., 2007) and  
30 fMRI (Vallesi et al., 2009; Coull et al., 2000) studies have shown involvement of activity in the right  
31 prefrontal cortex related to updating temporal expectations in variable foreperiod duration tasks. Thus,  
32 we expected to observe a significant correlation between the strength of the SFP effect on ITPC and  
33 reaction times in the right prefrontal cluster 13 (Figure A.9). An early fMRI study on attention on time  
34 compared brain regions activated by spatial and temporal attention (Coull and Nobre, 1998). This and  
35 other studies (e.g., Coull et al., 2004) found a region next the left insula only activated during temporal  
36 attention. Interestingly, many of the ICs in cluster 7 are close to the insula (Figure A.9).

37 Cravo and colleagues specifically studied how temporal expectation modulates the ITPC of neural  
38 oscillations in the EEG of humans. In a first study, Cravo et al. (2011) asked if temporal expectations  
39 influenced low-frequency rhythmic activity in the theta range (4-8 Hz). They found that temporal  
40 expectations modulate reaction times simultaneously with the amplitude, ITC, and phase-amplitude  
41 coupling in central-midline electrodes. Interestingly, they reported increased values of ITC at times of  
42 higher expectancy. The authors interpreted these modulations as reflecting motor preparation. Our  
43 finding of a significant correlation between the SFP effect on ITPC and detectability in the central  
44 cluster 19 (Figure 5a) is consistent with the report in Cravo et al. (2011). But, as we discussed above, we  
45 believe the modulations of ITPC observed in this manuscript are related to non-motor neural processes.  
46 The study by Cravo and colleagues used three foreperiod durations between a warning signal and a  
47 Go/No-go target. Differently from previous and from this study (see below), the authors found no  
48 modulations of ITC with the foreperiod duration. A possible explanation for this difference is that Cravo

1 and colleagues averaged **ITCs** across subjects before testing for modulations by the foreperiod duration.  
2 These modulations may have been present at the single subject level, but obscured in the average,  
3 which highlights the relevance of avoiding averages across subjects. In a second study **Cravo et al.**  
4 **(2013)** studied the effect of phase entrainment by repetitive visual stimulation of rhythmic activity in  
5 the delta range (1-4 Hz) over occipital cortex in an orientation discrimination task. They showed that  
6 150 ms before the presentation of a target stimulus the phase of delta oscillations clustered around the  
7 phase corresponding to the largest contrast gain. Considering the effects of expectancy in central brain  
8 regions in the Go/No-Go task reported by **Cravo et al. (2011)**, and those in occipital brain regions in the  
9 orientation discrimination task reported in **Cravo et al. (2013)**, the authors argued that “*the sites where*  
10 *temporal expectation modulate low-frequency oscillations . . . are highly dependent on the task demands.*”  
11 However, in **Cravo et al. (2011)** effects were only studied, or at least reported, over central regions, while  
12 in **Cravo et al. (2013)** effects were only reported over occipital regions. It is possible that extending  
13 their analysis to multiple brain regions could show effects over occipital areas in **Cravo et al. (2011)** and  
14 over central areas in **Cravo et al. (2013)** and invalidate their argument. This highlights the relevance of  
15 reporting results over all brain regions.

16 In an MEG investigation of the effect of attention on primary visual cortex activity, **Yamagishi et al.**  
17 **(2008)** showed that **ITC** over a left-occipital brain region was significantly correlated with subjects’  
18 orientation discrimination ability when attention was oriented toward, but not away from, a grating  
19 located on the right visual field. The authors concluded that the phase-resetting measured by **ITC**  
20 reflects an attention- and vision-related top-down modulation to primary visual cortex. Using a different  
21 brain-imaging modality, the investigation by **Yamagishi et al. (2008)** supports our previous finding that  
22 **ITPC** is related to behavioral performance, and the finding of part II of this manuscript that **ITPC**  
23 is modulated by attention. Also, it is an interesting coincidence that **Yamagishi et al. (2008)** found  
24 significant correlations between **ITC** and behavior in four time frequency points between 200 and 300 ms  
25 after an attention-orienting cue, and that we found the median of the largest **SFP** effect on **ITPC**  
26 at 292 ms (Section 2.5). However, our study and that of that **Yamagishi et al. (2008)** differ in an  
27 important regard; they used a trial-averaged measure of **ITPC** while we used a single-trial one. This  
28 single-trial analysis allowed us to find a new foreperiod effect, which shows that **ITPC** is not constant  
29 across trials, but varies systematically as a function of the **SFPD**. To determine if in our study **ITC**  
30 was also related to behavioral performance, we correlated the peak **ITC** value following the presentation  
31 of a standard (measured as indicated in Section A.5.4) with error rates and mean reaction times for  
32 all subjects, **standard modalities**, and **attended modalities**. Details of this investigation are reported  
33 in Section A.2, Figure A.2, and Tables A.1 and A.2. Similarly to **Yamagishi et al. (2008)**, we found  
34 that in the left-parieto-occipital cluster 04 **ITC** was significantly correlated with detection performance  
35 for attended, but not unattended, visual stimuli. However, in the right-parieto-occipital cluster 15 we  
36 found a significant correlation between the **ITC** triggered by attended auditory standards and detection  
37 performance, and in the central parieto-occipital cluster 09 we found a significant correlation between  
38 the **ITC** triggered by unattended auditory standards and detection performance. These results appear  
39 to contradict the conclusions from **Yamagishi et al. (2008)** that phase reset over occipital regions reflects  
40 vision-related top-down modulations and that these modulations are related to attention. However, this  
41 contradiction may be due to differences between our experiments (our temporal- versus their spatial-  
42 attention experiments, or our detection versus their discrimination experiments) or differences in the  
43 selection of the time-frequency bin used to compute **ITC** (we used the subject-, **standard modality**-,  
44 and **attended modality**-specific peak **ITC** frequency while **Yamagishi et al. (2008)** used the same time-  
45 frequency point for all subjects). The previous significant correlations between peak **ITC** values and  
46 subjects’ error rates were found after computing 56 correlations. None of these correlations survived the  
47 multiple-comparison adjustment (Section A.5.9). Therefore, some of these significant correlations  
48 could have appeared by chance. However, we suspect that not all of them are spurious since eight of

1 the nine unadjusted significant correlations were negative. Assuming that these correlations occurred  
2 by chance, the probabilities of obtaining positive and negative correlations should be equal. Under this  
3 assumption, the probability of obtaining eight out of nine significant correlations is very small ( $p < 0.02$ ).  
4 In our study, the significant correlations between **ITC** and behavior and those between the **SFP** effect on  
5 **ITPC** and behavior appear to reflect different neural processes since, with the exception of the correlation  
6 with error rates in the left parieto-occipital cluster 04, correlations with **ITC** occurred in different clusters,  
7 **standard modalities**, and **attended modality**, than those with the **SFP** effect on **ITPC** (compare daggers  
8 in Figures 3 and A.2). For example, most significant correlations between **ITC** and error rates error rates  
9 corresponded to auditory standards (Figure A.2 and Table A.1), while those between the **SFP** effect on  
10 **ITPC** and error rates corresponded to visual standards (Figure 3 and Table A.5).

11 An investigation by Busch et al. (2009) also showed that stimulus detectability is related to pres-  
12 timulus phase. Below we highlight a few differences between this study and ours. The purpose of this  
13 comparison is not to belittle the research by Busch et al. (2009), which we believe was excellent, but  
14 to emphasize a few novel characteristics of our analysis. First, the **ITC** and the phase coherence index  
15 used in the main text of Busch et al. (2009) are phase measures for groups of trials, while the **DMP**  
16 used in this article is a phase measure for single trials. Thus, we were able to decode the **SFP** duration  
17 from **DMP** values in a trial-by-trial basis, while these single-trial decodings are not possible with phase  
18 measures for groups of trials. In the supplementary Figure 2, Busch et al. (2009) reported the results  
19 of using a classifier to predict in a single trial if a stimulus will be detected based on the phase at a  
20 single time-frequency point. The fact that, after averaging the predictions of the classifiers of different  
21 subjects, they found a correlation between the predictions of the classifiers and the detection hit ratio is  
22 remarkable. However the analysis method is limited by using only one time-frequency point to predict  
23 the detectability of a stimulus. The models used in this manuscript used a 500 ms window of phase  
24 values to decode the **SFP** duration. That is, the second difference between the study by Busch et al.  
25 (2009) and ours is that they used univariate models, while we used multivariate ones. Note that we  
26 have optimized models to decode **SFP** durations, and then found significant correlations between the  
27 decoding power of these models and behavior without fitting model parameters to behavioral data. That  
28 a model optimized to predict behavior from a stimulus feature (e.g., **ITPC**) achieves reliable predictions  
29 does not necessarily mean that the stimulus feature is relevant to the behavior. A sufficiently complex  
30 model can predict arbitrarily closely any behavior from an irrelevant stimulus feature, if the model overfit  
31 the data (Geman et al., 1992). Although there exist methods to minimize the risks of overfitting, such  
32 as using separate pieces of data to estimate the parameters of a model and to evaluate its predictive  
33 power (the method used in Busch et al. (2009)), this risk never disappears when optimizing a model to  
34 predict behavior. Differently, the procedure used in this article to show that **ITPC** is related to behavior  
35 does not suffer from the overfitting problem, since no model parameter was fitted to behavioral data.  
36 The third difference is that the study by Busch et al. (2009) averaged data across subject while we an-  
37 alyzed different subjects separately. This single-subject analysis allowed to observe that those subjects  
38 whose brain activity was more strongly modulated by the **SFP** duration were those who performed better  
39 Fourth, Busch et al. (2009) reported the analysis of a single electrode (Fz), while our study described the  
40 analysis of the activity of **ICs** over the whole brain. As we discussed above in relation to the research by  
41 Cravo and collaborators, we believe it is important to report effects across the whole brain to show how  
42 hypothesis supported by activity in a given brain region generalize across the brain. Fifth, Busch et al.  
43 (2009) analyzed activity from EEG channels, while the present study characterized the activity of **ICs**.  
44 Applied to EEG, ICA finds maximally independent sources generating recorded potentials. Scalp repre-  
45 sentations of these sources resemble fields generated by current dipoles inside the brain, and biological  
46 arguments suggest that these maximally-independent sources reflect the synchronized activity of neurons  
47 in compact cortical regions (Delorme et al., 2012). Thus, our analysis most probably characterized the  
48 activity of cortical sources while that of Busch et al. (2009) described the activity of mixtures of these

1 sources. Sixth, the study by Busch et al. (2009) characterized phase correlates of visual processing, while  
2 our study investigated phase correlates of both visual and auditory processing. The multi-modal nature  
3 of our experiment allowed us to see that the SFP effect on ITPC was substantially stronger in the visual  
4 than in the auditory modality. An important advantage of the study by Busch et al. (2009) over ours  
5 is that, for each subject separately, they calibrated the visual stimuli so that the detection rate of the  
6 subject was close to 50%. No such individualized calibration was performed in our experiment, and  
7 the averaged detection rate across subjects was 86%. Having a similar number of trials where subjects  
8 perceived and failed to perceive the stimulus facilitates the estimation of the phase correlates of stimulus  
9 perception. However, the fact that the methods used in this manuscript could find reliable phase corre-  
10 lates of stimulus detection with sub-optimal stimulation shows that these methods could be applied to a  
11 larger number of EEG experiments where stimulation was not optimized for each subject.

### 12 3.3 What neural processes generate the SFP effect on ITPC?

13 What brain processes can make the phases of standards closer to the warning signal more aligned at  
14 some times but more misaligned at other times than the phases of standards further away from the  
15 warning signal? Also, how can it happen that phase alignment fluctuates in an oscillatory manner, as indi-  
16 cated in Figures 4a-c and A.7? Large values of ITPC are typically associated with phase resets, like those  
17 that occur upon the presentation of visual stimuli (e.g., Makeig et al., 2002). But a single phase-reset  
18 event is not the answer to the previous question, since after it all trials should have a similar phase, so that  
19 there would be no difference in ITPC between trials closer to and further away from the warning signal.  
20 A single phase-reset event can neither explain the fluctuations in ITPC. These fluctuations are reminis-  
21 cent of known variations in perception and reaction times that have been related to the phase of low-  
22 frequency neural rhythms (Bartley and Bishop, 1932; Bishop, 1932; Jarcho, 1949; Lindsley, 1952; Lansing,  
23 1957; Callaway and Yeager, 1960; Dustman and Beck, 1965; Trimble and Potts, 1975; Valera et al., 1981;  
24 Mathewson et al., 2009; Busch et al., 2009; Mathewson et al., 2012; Busch and VanRullen, 2010; Bonnefond and Jensen,  
25 2015; Liu et al., 2014; Drewes and VanRullen, 2011; Thorne et al., 2011; Fiebelkorn et al., 2011; Chakravarthi and VanR  
26 2012; Cravo et al., 2015; Milton and Pleydell-Pearce, 2016), reviewed in VanRullen and Koch (2003).  
27 However, if after a reset the phase evoked by standards oscillated identically across trials there would  
28 not be a difference in ITPC between trials closer and further-away from the warning signal.

29 A brain mechanism generating the above effects should be able to replicate the fluctuations in ITPC  
30 shown in Figures 4a-c and A.7. We make three observations: First, these fluctuations appear to oscillate  
31 at a very low frequency (i.e., less than 1 Hz), independently of the frequency at which the phase of trials  
32 was measured (the latter frequency is that of the cosine of the mean phase given by the dashed curve  
33 in Figures 4a-c and A.7). Coincidentally, fluctuations at 1 Hz in visual detectability have been reported  
34 by Fiebelkorn et al. (2011). Also, fluctuations in somatosensory detectability (between 0.01 and 0.1 Hz)  
35 have been described by Monto et al. (2008). Second, in some figures the phase of the oscillations in ITPC  
36 at time zero differs between early and late trials (e.g., the phase of the blue curve corresponding to early  
37 trials in Figure 4a is more advanced than that of the red curve corresponding to late trials). Third, as  
38 shown in Figure 5, these fluctuations are related to subjects' behaviors.

39 We propose a simple model for the generation of low-frequency oscillations that can account for the  
40 previous observations. The component of the recorded potential corresponding to trial  $i$ , at frequency  $f$ ,  
41 and time  $t$  is given by Eq. 1:

$$trial(i, f, t) = \cos(2\pi ft + \theta + n(SFPD[i], t)), \text{ with} \quad (1)$$

$$n(SFPD, t) = \mathcal{M}(\mu = 0, \kappa = \kappa(SFPD, t)) \quad (2)$$

$$\kappa(SFPD, t) = \frac{\max\kappa - \min\kappa}{2} \cos(2\pi f_n t + \theta(SFPD)) + \frac{\min\kappa + \max\kappa}{2}, \text{ and} \quad (3)$$

$$\theta(SFPD) = \frac{\pi}{(\max SFPD - \min SFPD)^s} (\max SFPD - SFPD)^s \quad (4)$$

To account for the first previous observation, we assume that the phase of the cosine is contaminated by an additive noise  $n$  (Eq. 2) following a von Mises distribution with a precision parameter,  $\kappa$ , varying sinusoidally on time (Eq. 3). When the precision of this noise is small and large we should observe decoherent and coherent activity, respectively, and, because the noise precision varies sinusoidally in time, we should observe alternations between coherence and decoherence, as shown in Figures 4a-c and A.7. To account for the second previous observation, we make the phase at time zero of the precision of the noise vary smoothly as a function of the SFPD (Eq. 4). To account for the third observation, we speculate that subjects achieving better detection performance were those showing larger modulations in the precision of the noise. For these subjects the ITPC should be more different between trials closer to and further away from the warning signal, and models should more reliably decode the SFPD from ITPC activity, in agreement with Figure 5. The parameters of the previous model are the frequency,  $f$ , the noiseless phase,  $\theta$ , and the vector of SFPDs,  $SFPD$ , in Eq. 1; the minimum and maximum values,  $\min\kappa$  and  $\max\kappa$ , and the frequency,  $f_n$ , of the noise precision in Eq. 3; and the steepness of the change in the noise precision phase as a function of the SFPD,  $s$ , in Eq. 4.

To validate the previous speculations we simulated data following the model in Eq. 1 (Figure A.3) and fitted a decoding model to this data, as described in Section A.3. With this simulated data we obtained oscillations in averaged DMP (Figures A.4a,b), as in Figure 4a-c. We also attained oscillations in the difference between the averaged DMP between trials closer to and further away from the warning signal (Figures A.4c,d), as in Figure 4d-f. In addition, we verified that a model fitted to data with larger fluctuations of the precision of the noise generated more accurate decodings than those of a model fitted to data with smaller modulations of this precision, supporting the previous argument on the relation between fluctuation of ITPC and subjects' behaviors. As explained in Section A.3, the correlation coefficient for a model fitted to data with smaller fluctuations of the precision of the noise was  $r = 0.23$  (95% CI=[0.12, 0.34]), which was significantly smaller than that for a model fitted to data with larger fluctuations of the precision of the noise  $r = 0.51$  (95% CI=[0.43, 0.59]).

These results show that a simple sinusoidal oscillation with a noise process added to its phase captures salient features of the SFP effect on ITPC, suggesting that this model is a good first description of how the SFPD modulates the phase of neural oscillations. Key properties of this noise process are its precision oscillating in time and its SFPD-dependent phase at time zero.

### 3.4 Single-trial predictive methods for EEG

Single-trial predictive models are seldomly used with EEG recordings to characterize the neural basis of psychophysical process (but see Sajda et al., 2009; Pernet et al., 2011b). These models are mostly applied to EEG recordings in brain computer interface applications (e.g., Nicolas-Alonso and Gomez-Gil, 2012; Wolpaw et al., 2002). However, these applications are usually focused on the predictive power of these models, and not so much on the brain mechanisms underlying the psychophysical process they attempt to predict. This omission is striking, since single-trial predictive models have been very successful for understanding the neural basis of psychophysical processes using fMRI recordings (e.g., Haxby et al., 2001; Haynes and Rees, 2005; Kamitani and Tong, 2005; Kay et al., 2008; Naselaris et al.,

2009; Serences and Boynton, 2007; Reey et al., 2010; Polyn et al., 2005; Mitchell et al., 2008; Abrams et al., 2011; Hampton and O’Doherty, 2007). For reviews see Naselaris et al. (2011); Tong and Pratte (2012). Note that applying single-trial predictive methods to EEG recordings offers the possibility of understanding the neurophysiological basis of behaviors that occur at fast time scales, which cannot be studied with typical fMRI recordings. For example, it would have been impossible to find that the SFPD modulates the ITPC triggered by standards since these modulations occur in a 500 ms-long time window that cannot be resolved with the two seconds sampling rate of typical fMRI experiments.

LIMO EEG (Pernet et al., 2011a) is an existing single-trial predictive method for EEG recordings. It attempts to predict the activity of electrodes using experimental factors as inputs. The method described in this manuscript differs from the previous one in that the EEG recordings are used as inputs to predict an experimental factor (i.e., the SFP duration). That is, LIMO EEG is an encoding method, aiming at describing how experimental factors are encoded in EEG activity, while the method introduced here is a decoding one, seeking to predict experimental factors from EEG activity. An advantage of decoding over encoding methods is that they can be readily used to determine that a certain pattern of brain activity (e.g., ITPC) is related to a particular behavioral characteristic (e.g., reaction times). This can be done by using the decoding method to decode an experimental factor that is related to the particular behavior (e.g., the SFPD is related to reaction times). Then the decoding of the method should be related to the behavior, as we showed in this article. On the contrary, is not straightforward to relate patterns of brain activity and behavior with encoding methods. Another advantage of the method used here compared to LIMO EEG is that the former method is a multivariate test, while the latter uses univariate tests. Both methods can be used to test if a scalar trial attribute (e.g., the SFPD) is related to a time-varying trial attribute (e.g., the ITPC at time  $t$ ). However, the method introduced here uses information across all time points to test if a time-dependent trial attribute at a given time is related to the scalar trial attribute, while LIMO EEG only uses information at one time point to test if the time-dependent trial attribute at that point is related to the scalar trial attribute. If the time-varying trial attribute is correlated across time (as happens with most EEG time-varying attributes) a multivariate method should be more powerful than a univariate one.

The construction of predictive methods for EEG data requires to address two signal processing problems: the curse of dimensionality and multicollinearity of the EEG regressors. The curse of dimensionality refers to the exponential increase of the volume of a space as its dimensionality grows (Bellman, 1961). In predictive models the dimensionality of the input space is given by the number of predictors. To estimate accurate models one should use training data densely covering the volume of the input space. However, if the input space is very high dimensional, collecting enough training data to densely cover the “exponentially large” volume of the input space becomes unfeasible. For example, in EEG predictive methods one would like to use all EEG samples in an interval preceding an event of interest (i.e., presentation of a standard) as regressors to predict an stimulus property (i.e., the SFP duration). However, if this interval is long and/or the EEG sampling rate is large, the number of regressors will be very large and the predictive method will become impractical, due to the curse of dimensionality. Multicollinearity in the inputs is another important problem in predictive models because, among other things, it yields parameters estimates with large variance (Belsley et al., 2004), which in turn limits the inferences that can be made from these estimates.

The predictive method used in this article was a simple one. To address the previous signal processing problems we used a regularized linear regression model (Section A.5.7) and estimated its parameters using a variational method (Section A.5.8). We have developed more elaborated predictive methods for the characterization of responses of visual cells from their responses to (correlated) natural stimuli (Rapela et al., 2006, 2010). These are nonlinear methods specifically designed to address the curse of dimensionality and multicollinearity problems. Using nonlinear predictive models, carefully validated with behavioral data, to characterize EEG recordings could generate superior predictions and be able to



1 model a broader range of psychophysical processes than those achievable with linear models. We will  
2 apply these more advanced predictive model to EEG recordings in future investigations.

3 In summary, the decoding method used in this article is just a first step in using EEG activity to  
4 decode behavior and there exist ample possibilities for further improvements.

### 5 **3.5 Future work**

6 In future investigations we will perform new experiments to test how psychophysical factors modulate  
7 the **SFP** effect on **ITPC**. For this we will build on thoughtful investigations on the psychophysical factors  
8 associated with the CNV. Is the **SFP** effect on **ITPC** related to expectancy (Walter et al., 1964)? Would  
9 it disappear if responses to deviants are not required? Would it be attenuated if a proportion of deviants  
10 do not require response? Is the **SFP** effect on **ITPC** linked to motor preparation (Gaillard, 1977, 1978)?  
11 Does the emergence of this effect requires motor responses? What is the relation between the **SFP** effect  
12 on **ITPC** and intention to respond (Low et al., 1966)? Would the strength of this effect be directly  
13 proportional to the anticipated force needed in the motor response? Is the **SFP** effect on **ITPC** related  
14 to motivation (McCallum and Walter, 1968)? Would the strength of this effect be augmented when  
15 subjects are instructed to concentrate hard and respond quickly to deviants? How does this effect relate  
16 to arousal (Tecce, 1972)? Would the relation between arousal and this effect be U-shaped, as is the  
17 relation between arousal and CNV amplitude (Tecce, 1972, Figure 6b)? Is the **SFP** effect on **ITPC** linked  
18 to to explicit (Macar and Vidal, 2003; Pfeuty et al., 2003, 2005) or implicit (Praagstra et al., 2006) time  
19 perception? Would this effect reflect the perceived duration of a target interval when subjects compare  
20 it to the duration of a memorized interval? We will address these questions in future investigations.

## 21 **4 Summary**

22 We claimed that phase coherence is a key aspect of neural activity currently under used for the char-  
23 acterization of EEG recordings. We proposed a single-trial measure of phase coherence (Figure 7) an  
24 a method to relate it to experimental variables (Figure 2). Using this measure and method we demon-  
25 strated a novel foreperiod effect on single-trial phase coherence. We showed that the new foreperiod effect  
26 is not an artifact of the proposed method since it can be observed in simple trial averages (Figure 4).  
27 We demonstrated the relevance of the new foreperiod effect by reporting strong correlations between  
28 the strength of the effect and subjects' error rates and mean reaction times (Figure 5). We argued that  
29 temporal expectancy plays an important role in the generation of the new foreperiod effect. We hope the  
30 present manuscript has provided convincing evidence for the relevance of phase coherence for the charac-  
31 terization of EEG recordings and that it has shown that single-trial decoding methods can provide useful  
32 information about brain processes. We anticipate that the new foreperiod effect on phase coherence will  
33 lead to as many important insights about anticipatory behavior as the foreperiod effect on reaction times  
34 has done until now.

## 35 **5 Methods**

### 36 **5.1 Experiment information**

37 We analyzed the experimental data first characterized in Ceponiene et al. (2008). Below we summarize  
38 features of this data relevant to the present study; further details are given in the previous article.

### 5.1.1 Subjects

We only characterized the younger-adult subpopulation in [Ceponiene et al. \(2008\)](#), comprising 19 subjects (11 females) with a mean age of  $25.67 \pm 5.94$  years.

### 5.1.2 Stimuli

Stimuli were sequentially presented in a visual and an auditory stream (Figure 1a). Auditory stimuli were 100 ms duration, 550 Hz (deviants) and 500 Hz (standards) sine-wave tones. These tones were played via two loudspeakers located at the sides of a 21-inch computer monitor. Visual stimuli were light-blue (deviants) and dark-blue (standards) filled squares subtending 3.3 degrees of visual angle, presented on a computer monitor for 100 ms on a light-gray background. Interspersed among the deviant and standard stimuli were attention-shifting cues. These cues were presented bimodally for 200 ms, by displaying the words HEAR (LOOK) on orange letters on the computer monitor and simultaneously playing the words HEAR (LOOK) on the loudspeakers. The inter-stimulus interval (ISI) between any two consecutive stimuli varied pseudo-randomly between 100 and 700 ms as random samples from short, medium, and large uniform distributions, with supports [100-300 ms], [301-500 ms], and [501-700 ms], respectively. In each block, the ISI of 132, 60, and 72 pseudo-randomly chosen stimuli were drawn from the short, medium, and large ISI distributions, respectively. Stimuli were presented in blocks of 264 for a duration of 158 seconds. Each block consisted of 24 cue stimuli (12 visual) and 240 non-cue stimuli (120 visual). The 120 non-cue stimuli of each modality comprised 24 deviants and 96 standards. A video of the experimental stimuli appears at <http://sccn.ucsd.edu/~rapela/avshift/experiment.MP4>

### 5.1.3 Experimental design

The experiment comprised FOCUS-VISION, FOCUS-AUDITION, and SWITCH blocks. In FOCUS-VISION (AUDITION) blocks subjects had to detect visual (auditory) deviants and ignore attention-shifting cues. In SWITCH blocks these cues became relevant, and after a LOOK (HEAR) cue subjects had to detect visual (auditory) deviants. The type of block was told to the subject at the beginning of each block. Subjects pressed a button upon detection of deviants. Each subject completed four FOCUS-VISION blocks, four FOCUS-AUDITION blocks, and 12 SWITCH blocks. Here we only characterize SWITCH blocks. Correct responses in SWITCH blocks are shown in Figure 1b. After a LOOK (HEAR) cue subjects oriented their attention to the visual (auditory) modality, as indicated by the magenta (cyan) segments in Figure 1b. A **warning signal** is a stimulus initiating a period of expectancy for a forthcoming deviant. LOOK (HEAR) cues were the **warning signals** in the SWITCH blocks characterized in this study.

## 5.2 EEG acquisition

Continuous EEG was recorded from 33 scalp sites of the International 10-20 system, with xxx electrodes and a yyy amplifier, and digitized at 250 Hz. The right mastoid served as reference.

## 5.3 Characterized epochs

For each IC of each subject we built four sets epochs, aligned at time zero to the presentation of attended visual standards, attended auditory standards, unattended visual standards, and unattended auditory standards, with a duration of 500 ms (Figure 2c) We call **standard modality** to the modality of the stimuli used to align a set of epochs (visual or auditory), and we call **attended modality** to the attended modality corresponding to a set of epochs (e.g., the visual (auditory) modality for epochs aligned to the

1 presentation of attended (unattended) visual standards). The mean number of epochs aligned to the  
2 presentation of attended visual standards, attended auditory standards, unattended visual standards,  
3 and unattended auditory standards was 150, 136, 99, and 94, respectively. Note that the mean number  
4 of epochs aligned to the presentation of attended stimuli was considerably larger than that aligned to  
5 the presentation of unattended stimuli, for both the visual and auditory standards. Thus, for testing  
6 the influence of attention on the **SFPD** effect on **ITPC** (Section 2.4) we equalized the number of epochs  
7 used to fit attended and unattended models. For each attended model, we selected a random subset  
8 of the attended epochs of size equal the number of epochs used to fit the corresponding unattended  
9 model. Figure A.10a displays histograms of deviant latencies, with respect to the presentation time of  
10 the previous standard, for all combinations of **standard modalities** and **attended modalities**. To avoid  
11 possible movement artifacts due to the response to deviants, we excluded from the analysis epochs where  
12 deviants of the attended modality were presented in the 500 ms after the presentation of the standard at  
13 time zero. The number of deviants excluded from the analysis is given by the sum of counts to the left  
14 of the red vertical lines in Figure A.10a. Figure A.10b shows histograms of **SFPDs** for all combinations  
15 of **standard modalities** and **attended modalities**. The vertical green line correspond to the mean **SFPD**,  
16 which was shorter for epochs where attention was directed to the visual (1.9 sec, left panels) than to  
17 the auditory modality (2.4 sec, right panels). A repeated-measures ANOVA with **SFPD** as dependent  
18 variable showed a significant main effect of **attended modality** ( $F(1, 16264)=234.31, p<0.0001$ ) and a  
19 posthoc analysis indicated that the mean **SFPD** was shorter in epochs corresponding to visual than to  
20 auditory attention ( $z=15.31, p<2e-16$ ). Further information on this ANOVA appears in Section A.5.12.

## 21 5.4 Deviation from the mean phase

22 Let  $\theta_0$  be the phase of a given trial, and  $\theta_1, \dots, \theta_N$  be the phases of the trials in a reference set, all phases  
23 measured at the same time-frequency point. Then, the deviation from the mean phase is a measure of the  
24 difference between the phase of the given trial (i.e.,  $\theta_0$ ) and the mean phase of all trials in the reference  
25 set, (i.e., mean direction,  $\bar{\theta}(\theta_1, \dots, \theta_N)$ , Eq. A.6), as illustrated in Figure 7. The circular variance ( $CV$ ,  
26 Eq. A.5) is used to measure this difference:

$$DMP(\theta_0|\{\theta_1, \dots, \theta_N\}) = CV(\theta_0, \bar{\theta}(\theta_1, \dots, \theta_N)) \quad (5)$$

27 The **DMP** is zero (one) if the phase of the given trial is equal (opposite) to the mean phase of the trials  
28 in the reference set. The **DMP** has previously been used to investigate interelectrode phase coherence  
29 with EEG recordings (Hanslmayr et al., 2007, Figure 2c). It is an appealing measure of single-trial  
30 phase coherence since, as demonstrated in Section A.5.6, when there is large phase concentration (i.e.,  
31  $ITC \simeq 1$ ) the average value of the **DMP** approaches the **ITC**, a widely used measure of averaged **ITPC**  
32 (Section A.5.4). When there is not large phase concentration, the mean phase cannot be estimated  
33 reliably, and therefore the **DMP** becomes unsound. Here we only computed **DMP** values at times where  
34 the distribution of phases across trials was significantly different from the uniform distribution ( $p<0.01$ ,  
35 Raleigh test).

## 36 6 Acknowledgments

37 We thank Dr. Steve Hillyard for suggesting Figure 4 and to investigate the influence of the maxi-  
38 mum **SFPD** in the decodings of the models (Figure A.5). We thank Dr. Cyril Pernet for suggesting  
39 the use of robust correlation coefficients. We also thank Mr. Robert Buffington for computer assis-  
40 tance. Most of the research in this paper was performed with free software. Computations were done

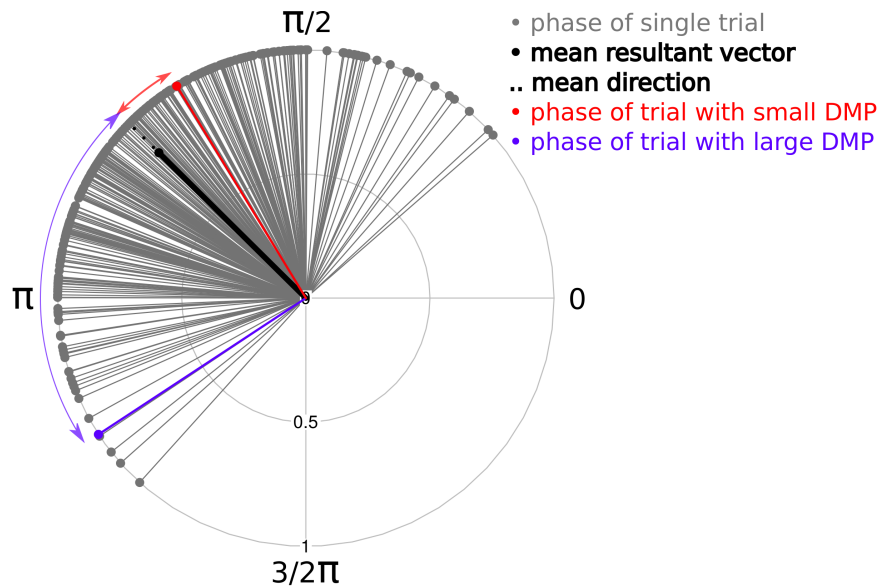

Figure 7: Computation of the **DMP**. Given a set of phases, represented by gray unit vectors, one first calculates the mean of these unit vectors (the mean resultant vector, black solid vector) and extracts the phase of this mean vector (mean direction, Eq. A.6, black dotted unit vector). Then the deviation from the mean phase for a given phase (e.g., the phase corresponding to the red unit vector) is a measure of distance (i.e., circular variance, Eq. A.5) between this phase and the mean direction (e.g., red arc). The red and blue unit vectors correspond to phases with small and large **DMPs**, respectively.

with R (R Core Team, 2012), the article was written in L<sup>A</sup>T<sub>E</sub>X (Lamport, 1994), figures were prepared with Inkscape (The Inkscape Team, 2004), all in a personal computer and in clusters of personal computers running Linux (Torvalds, 2008). The only paid software used in this investigation was MATLAB (MATLAB, 2013), employed solely for initial preprocessing with ICA (Makeig et al., 1996).

## Glossary

**attended modality** the attended modality (visual or auditory) corresponding to a set of epochs (Section 5.3).

**DMP** (deviation from the mean phase) single-trial measure of **ITPC** (Section 5.4).

**IC** (independent component) component from an ICA decomposition (Section A.5.1).

**ITC** (inter trial coherence) a measure of **ITPC** in a group of trials (Section A.5.4).

**ITPC** (inter trial phase coherence) degree of phase alignment across multiple trials. Here we use the **DMP** and the **ITC** as measures of **ITPC** for single trials and for groups of trials, respectively (Section 1).

**SFP** (standard foreperiod) interval between the presentation of a **warning signal** and a standard stimulus (Section 1).

**SFPD** (standard foreperiod duration) duration of a **SFP** (Section 1).

1 **standard modality** the modality of the standard stimuli (visual or auditory) used to align a set of  
2 epochs (Section 5.3).

3 **warning signal** stimulus initiating a period of expectancy for a forthcoming independent stimulus. The  
4 LOOK and HEAR attention-shifting cues are the warning signals in this study (Section 5.1.3).

## 5 7 Bibliography

6 D.A. Abrams, A. Bhatara, S. Ryali, E. Balaban, D.J. Levitin, and V. Menon. Decoding temporal  
7 structure in music and speech relies on shared brain resources but elicits different fine-scale spatial  
8 patterns. *Cerebral Cortex*, 21:1507–1518, 2011.

9 Ehud Ahissar, Srikantan Nagarajan, Merav Ahissar, Athanassios Protopapas, Henry Mahncke, and  
10 Michael M Merzenich. Speech comprehension is correlated with temporal response patterns recorded  
11 from auditory cortex. *Proceedings of the National Academy of Sciences*, 98(23):13367–13372, 2001.

12 S.H. Bartley and G.H. Bishop. The cortical response to stimulation of the optic nerve in the rabbit.  
13 *American Journal of Physiology–Legacy Content*, 103(1):159–172, 1932.

14 JAV Bates. Electrical activity of the cortex accompanying movement. *The Journal of physiology*, 113  
15 (2-3):240–257, 1951.

16 K.M. Bausenhardt, B. Rolke, and R. Ulrich. The locus of temporal preparation effects: evidence from the  
17 psychological refractory period paradigm. *Psychonomic Bulletin and Review*, 13:536–542, 2006.

18 R.E. Bellman. *Adaptive control processes*. Princeton University Press, Princeton, NJ, 1961.

19 D.A. Belsley, E Kuh, and R. E. Welsch. *Regression Diagnostics: Identifying Influential Data and Sources*  
20 *of Colinearity*. Wiley-Interscience, Hoboken, NJ, 2004.

21 Barbara Berger, Tamas Minarik, Gianpiero Liuzzi, Friedhelm C Hummel, and Paul Sauseng. EEG  
22 oscillatory phase-dependent markers of corticospinal excitability in the resting brain. *BioMed research*  
23 *international*, 2014, 2014.

24 J. Besle, C.A. Schevon, A.D. Mehta, P. Lakatos, R.R. Goodman, G.M. McKhann, R.G. Emerson, and  
25 C.E. Schroeder. Tuning of the human neocortex to the temporal dynamics of attended events. *The*  
26 *Journal of Neuroscience*, 31(9):3176–3185, 2011.

27 C.M. Bishop. *Pattern recognition and machine learning*. Springer, New York, NY, 2006.

28 G.H. Bishop. Cyclic changes in excitability of the optic pathway of the rabbit. *American Journal of*  
29 *Physiology–Legacy Content*, 103(1):213–224, 1932.

30 Mathilde Bonnefond and Ole Jensen. Alpha oscillations serve to protect working memory maintenance  
31 against anticipated distracters. *Current biology*, 22(20):1969–1974, 2012.

32 Mathilde Bonnefond and Ole Jensen. Gamma activity coupled to alpha phase as a mechanism for top-  
33 down controlled gating. *PloS one*, 10(6):e0128667, 2015.

34 Conrado A Bosman, Thilo Womelsdorf, Robert Desimone, and Pascal Fries. A microsaccadic rhythm  
35 modulates gamma-band synchronization and behavior. *The Journal of Neuroscience*, 29(30):9471–  
36 9480, 2009.

- 1 J. Botwinick and J.F. Brinley. An analysis of set in relation to reaction time. *Journal of Experimental*  
2 *Psychology*, 63(6):568–574, 1962.
- 3 F. Bretz, T. Hothorn, and P. Westfall. *Multiple comparisons using R*. Chapman & Hall/CRC Press,  
4 Boca Raton, FL, 2010.
- 5 C.H. Brunia and G.J. van Boxtel. Wait and see. *International Journal of Psychophysiology*, 43(1):59–75,  
6 2001.
- 7 C.H.M. Brunia and A.H.W. Boelhouwer. Reflexes as a tool: a window in the central nervous system. In  
8 P.K. Ackles, J.R. Jennigs, and M.G.H. Coles, editors, *Advances in Psychophysiology*, volume 3, pages  
9 1–67. JAI Press, Greenwich, CT, 1988.
- 10 N.A. Busch and R. VanRullen. Spontaneous EEG oscillations reveal periodic sampling of visual attention.  
11 *Proceedings of the National Academy of Sciences*, 107(37):16048–16053, September 2010.
- 12 N.A. Busch, J. Dubois, and R. VanRullen. The phase of ongoing EEG oscillations predicts visual pre-  
13 ception. *The Journal of Neuroscience*, 29(24):7869–7876, June 2009.
- 14 E. Callaway and C.L. Yeager. Relationship between reaction time and electroencephalographic alpha  
15 phase. *Science*, 132(3441):1765–1766, 1960.
- 16 Paolo Capotosto, Claudio Babiloni, Gian Luca Romani, and Maurizio Corbetta. Frontoparietal cortex  
17 controls spatial attention through modulation of anticipatory alpha rhythms. *The Journal of Neuro-*  
18 *science*, 29(18):5863–5872, 2009.
- 19 R. Ceponiene, M. Westerfield, M. Toriki, and J. Townsend. Modality-specificity of sensory aging in vision  
20 and audition: evidence from event-related potentials. *Brain Research*, 1215:53–68, 2008.
- 21 R. Chakravarthi and R. VanRullen. Conscious updating is a rhythmic process. *Proceedings of the National*  
22 *Academy of Sciences*, 109(26):10599–604, 2012.
- 23 Gregory B Cogan and David Poeppel. A mutual information analysis of neural coding of speech by  
24 low-frequency MEG phase information. *Journal of neurophysiology*, 106(2):554–563, 2011.
- 25 A. Correa. Enhancing behavioural performance by visual temporal orienting. In A.C. Nobre and J.T.  
26 Coull, editors, *Attention and Time*, chapter 3, pages 359–370. Oxford University Press, Oxford, UK,  
27 2010.
- 28 Á. Correa, J. Lupá nez, and P. Tudela. Attentional preparation based on temporal expectancy modulates  
29 processing at the perceptual-level. *Psychonomic Bulletin and Review*, 12(2):328–334, 2005.
- 30 Á. Correa, P. Cappucci, A.C. Nobre, and J. Lupia nez. The two sides of temporal orienting: facilitating  
31 perceptual selection, disrupting response selection. *Experimental Psychology*, 57(2):142–148, 2010.
- 32 J.T. Coull. Neural substrates of mounting temporal expectation. *PLoS Biol*, 7(8):e1000166, 2009.
- 33 J.T. Coull and A.C. Nobre. Where and when to pay attention: the neural systems for directing attention  
34 to spatial locations and to time intervals revealed by both PET and fMRI. *Journal of Neuroscience*,  
35 18(18):7426–7435, 1998.

- 1 J.T. Coull, C.D. Frith, C Büchel, and A.C. Nobre. Orienting attention in time: behavioural and neu-  
2 roanatomical distinction between exogenous and endogenous shifts. *Neuropsychologia*, 38(6):808–819,  
3 2000.
- 4 J.T. Coull, F. Vidal, B. Nazarian, and F. Macar. Functional anatomy of the attentional modulation of  
5 time estimation. *Science*, 303(5663):1506–1508, 2004.
- 6 A.M. Cravo, G. Rohenkohl, V. Wyart, and A.C. Nobre. Endogenous modulation of low frequency  
7 oscillations by temporal expectations. *Journal of Neurophysiology*, 106(6):2964–2972, 2011.
- 8 A.M. Cravo, G. Rohenkohl, V. Wyart, and A.C. Nobre. Temporal expectation enhances contrast sensi-  
9 tivity by phase entrainment of low-frequency oscillations in visual cortex. *Journal of Neuroscience*, 33  
10 (9):4002–4010, 2013.
- 11 Andre Mascioli Cravo, Karin Moreira Santos, Marcelo Bussotti Reyes, Marcelo Salvador Caetano, and  
12 Peter ME Claessens. Visual causality judgments correlate with the phase of alpha oscillations. *Journal*  
13 *of cognitive neuroscience*, 2015.
- 14 R.Q. Cui, A. Egkher, D. Huter, W. Lang, G. Lindinger, and L. Deecke. High resolution spatio-temporal  
15 analysis of the contingent neg- ative variation in simple or motor complex motor tasks and a non-motor  
16 task. *Clinical Neurophysiology*, 111:1847–1859, 2000.
- 17 A. Delorme and S. Makeig. EEGLAB: an open source toolbox for analysis of single-trial EEG dynamics  
18 including independent component analysys. *Journal of Neuroscience Methods*, 134(1):9–21, 2004.
- 19 A. Delorme, T. Sejnowski, and S. Makeig. Enhanced detection of artifacts in EEG data using higher-order  
20 statistics and independent component analysis. *Neuroimage*, 34(4):1443–1449, 2007.
- 21 A. Delorme, J. Palmer, J. Onton, R. Oostenveld, and S. Makeig. Independent EEG sources are dipolar.  
22 *PLoS One*, 7(2), 2012.
- 23 A. Delorme, M. Miyakoshi, T.P. Jung, and S. Makeig. Grand average erp-image plotting and statistics:  
24 A method for comparing variability in event-related single-trial EEG activities across subjects and  
25 conditions. *Journal of Neuroscience Methods*, 250:3–6, 2015.
- 26 Keith B Doelling, Luc H Arnal, Oded Ghitza, and David Poeppel. Acoustic landmarks drive delta-  
27 theta oscillations to enable speech comprehension by facilitating perceptual parsing. *Neuroimage*, 85:  
28 761–768, 2014.
- 29 J. Drewes and R. VanRullen. This is the rhythm of your eyes: the phase of ongoing electroencephalogram  
30 oscillations modulates saccadic reaction time. *Journal of Neurosciences*, 31(12):4698–4708, 2011.
- 31 R.E. Dustman and E.C. Beck. Phase of alpha brain waves, reaction time and visually evoked potentials.  
32 *Electroencephalography and Clinical Neurophysiology*, 18:433–440, 1965.
- 33 B. Efron and R.J. Tibshirani. *An introduction to the bootstrap*. Chapman & Hall, New York, NY, 1993.
- 34 I.C. Fiebelkorn, J.J. Foxe, J.S. Butler, M.R. Mercier, A.C. Snyder, and S. Molholm. Ready, set, reset:  
35 stimulus-locked periodicity in behavioral performance demonstrates the consequences of cross-sensory  
36 phase reset. *The Journal of Neuroscience*, 31(27):9971–9981, July 2011.
- 37 I.C. Fiebelkorn, A.C. Snyder, M.R. Mercier, J.S. Butler, S. Molholm, and J.J. Foxe. Cortical cross-  
38 frequency coupling predicts perceptual outcomes. *Neuroimage*, 69:126–137, 2013.

- 1 M. Frigge, D.C. Hoaglin, and B. Iglewicz. Some implementations of the boxplot. *American statistical*  
2 *association*, 43(1):50–54, 1989.
- 3 Takako Fujioka, Laurel J Trainor, Edward W Large, and Bernhard Ross. Internalized timing of  
4 isochronous sounds is represented in neuromagnetic beta oscillations. *The Journal of Neuroscience*, 32  
5 (5):1791–1802, 2012.
- 6 A.W. Gaillard. The late CNV wave: preparation versus expectancy. *Psychophysiology*, 14:563–568, 1977.
- 7 A.W. Gaillard. *Slow brain potential preceding task performance*. Academische Press, Amsterdam, 1978.
- 8 Robert Galambos, Scott Makeig, and Peter J Talmachoff. A 40-hz auditory potential recorded from the  
9 human scalp. *Proceedings of the National Academy of Sciences*, 78(4):2643–2647, 1981.
- 10 S. Geman, E. Bienenstock, and R. Doursat. Neural networks and the bias/variance dilemma. *Neural*  
11 *Computation*, 4:1–58, 1992.
- 12 Anne-Lise Giraud and David Poeppel. Cortical oscillations and speech processing: emerging computa-  
13 tional principles and operations. *Nature neuroscience*, 15(4):511–517, 2012.
- 14 C.M. Gomez, A. Delinte, E. Vaquero, M.J. Cardoso, M. Vazquez, M. Crommelynck, and A. Roucoux.  
15 Current source density analysis of cnv during temporal gap paradigm. *Brain Topography*, 13:149–159,  
16 2001.
- 17 C.M. Gomez, J. Marco, and C. Grau. Preparatory visuo-motor cortical network of the contingent negative  
18 variation estimated by current density. *Neuroimage*, 20:216–224, 2003.
- 19 M. Gomez-Ramirez, S.P. Kelly, S. Molholm, P Sehatpour, T.H. Schwartz, and J.J. Foxe. Oscillatory  
20 sensory selection mechanism during intersensory attention to rhythmic auditory and visual inputs: a  
21 human electrocorticographic investigation. *The Journal of Neuroscience*, 31(50):18556–18567, 2011.
- 22 Michael J Gray, Hans-Peter Frey, Tommy J Wilson, and John J Foxe. Oscillatory recruitment of bilateral  
23 visual cortex during spatial attention to competing rhythmic inputs. *The Journal of Neuroscience*, 35  
24 (14):5489–5503, 2015.
- 25 S. Grondin. From physical time to the first and second moments of psychological time. *Psychological*  
26 *Bulletin*, 127:22–44, 2001.
- 27 J. Gross, N. Hoogenboom, G. Thut, P. Schyns, S. Panzeri, P. Belin, and S. Garrod. Speech rhythms  
28 and multiplexed oscillatory sensory coding in the human brain. *PLoS Biology*, 11(12), 2013. doi:  
29 10.1371/journal.pbio.1001752.
- 30 S.A. Hackley and F. Valle-Inclan. Accessory stimulus effects on response selection: Does arousal speed  
31 decision making? *Journal of Cognitive Neuroscience*, 11:321–329, 1999.
- 32 J.P. Hamm, K.A. Dyckman, L.E. Ethridge, J.E. McDowell, and B.A. Clementz. Preparatory activations  
33 across a distributed cortical network determine production of express saccades in humans. *Journal of*  
34 *Neurosciences*, 30(21):7350–7357, 2010.
- 35 A.N. Hampton and J.P. O’Doherty. Decoding the neural substrates of reward-related decision making  
36 with functional mri. *Proceedings of the National Academy of Science*, 104:1377–1382, 2007.



- 1 B. Händel and T. Haarmeier. Cross-frequency coupling of brain oscillations indicates the success in visual  
2 motion discrimination. *Neuroimage*, 45(3):1040–1046, 2009.
- 3 S. Hanslmayr, A. Aslan, T. Staudigl, W. Klimesch, C.S. Herrmann, and K. Bauml. Prestimulus oscillations  
4 predict visual perception performance between and within subjects. *Neuroimage*, 37:1465–1473, 2007.
- 5 Simon Hanslmayr, Gregor Volberg, Maria Wimber, Sarang S Dalal, and Mark W Greenlee. Prestimulus  
6 oscillatory phase at 7 hz gates cortical information flow and visual perception. *Current Biology*, 23  
7 (22):2273–2278, 2013.
- 8 T. Hastie, R. Tibshirani, and J. Friedman. *The Elements of Statistical Learning*. Springer, New York,  
9 NY, 2009.
- 10 J.V. Haxby, M.I. Gobbini, M.L. Furey, A. Ishai, J.L. Schouten, and P. Pietrini. Distributed and overlap-  
11 ping representations of faces and objects in ventral temporal cortex. *Science*, 293:2425–2430, 2001.
- 12 J.D. Haynes and G. Rees. Predicting the orientation of invisible stimuli from activity in human primary  
13 visual cortex. *Nature Neuroscience*, 8:686–691, 2005.
- 14 Molly J Henry and Jonas Obleser. Frequency modulation entrains slow neural oscillations and optimizes  
15 human listening behavior. *Proceedings of the National Academy of Sciences*, 109(49):20095–20100,  
16 2012.
- 17 Gregory Hickok, Haleh Farahbod, and Kouros Saberi. The rhythm of perception entrainment to acoustic  
18 rhythms induces subsequent perceptual oscillation. *Psychological science*, page 0956797615576533,  
19 2015.
- 20 Mary F Howard and David Poeppel. Discrimination of speech stimuli based on neuronal response phase  
21 patterns depends on acoustics but not comprehension. *Journal of neurophysiology*, 104(5):2500–2511,  
22 2010.
- 23 Mary F Howard and David Poeppel. The neuromagnetic response to spoken sentences: co-modulation  
24 of theta band amplitude and phase. *Neuroimage*, 60(4):2118–2127, 2012.
- 25 L. Hultin, P. Rossini, G.L. Romani, P. Hogstedt, F. Tecchio, and V. Pizzella. Neuromagnetic localiza-  
26 tion of the late component of the cognitive negative variation. *Electroencephalography and Clinical  
27 Neurophysiology*, 98:435–448, 1996.
- 28 L.W. Jarcho. Excitability of cortical afferent systems during barbiturate anesthesia. *Journal of neuro-  
29 physiology*, 12(6):447–457, 1949.
- 30 T.P. Jung, S. Makeig, M. Westerfield, J. Townsend, E. Courchesne, and T.J. Sejnowski. Analysis and  
31 visualization of single-trial event-related potentials. *Human brain mapping*, 14(3):166–185, 2001.
- 32 Y. Kamitani and F. Tong. Decoding the visual subjective contents of human brain. *Nature Neuroscience*,  
33 8(5):679–685, 2005.
- 34 K.N. Kay, T. Naseralis, R.J. Prenger, and J.L. Gallant. Identifying natural images from human brain  
35 activity. *Nature*, 452(7185):352–355, 2008.
- 36 C. Kayser, C.L. Petkov, and N.K. Logothetis. Visual modulation in auditory cortex. *Cerebral Cortex*,  
37 18(7):1560–1574, 2008.

- 1 M.H. Kutner, C.J. Nachtsheim, J. Neter, and W. Li. *Applied linear statistical models*. McGraw-Hill/Irwin,  
2 New York, NY, 2005.
- 3 J.P. Lachaux, E. Rodriguez, J. Martinerie, and F.J. Varela. Measuring phase synchrony in brain signals.  
4 *Human brain mapping*, 8(4):194–208, 1999.
- 5 P. Lakatos, A.S. Shah, K.H. Knuth, I. Ulbert, G. Kamos, and C.E. Schroeder. An oscillatory hierarchy  
6 controlling neural excitability and stimulus processing in the auditory cortex. *J. Neurophysiology*, 94  
7 (3):1904–1911, 2005.
- 8 P. Lakatos, G. Kamos, A.D. Mehta, I. Ulbert, and C.E. Schroeder. Entrainment of neuronal oscillations  
9 as a mechanism of attentional selection. *Science*, 320:110–113, 2008.
- 10 P. Lakatos, M. N. O’Connell, A. Barczak, A. Mills, D.C. Javitt, and C.E. Schroeder. The leading sense:  
11 supramodal control of neurophysiological context by attention. *Neuron*, 64:419–430, 2009.
- 12 P. Lakatos, G. Musacchia, M.N. O’Connell, A.Y. Falchier, D.C. Javitt, and C.E. Schroeder. The spec-  
13 trotemporal filter mechanism of auditory selective attention. *Neuron*, 77(4):750–761, 2013.
- 14 L. Lamport. *Latex*. Addison-Wesley, 1994.
- 15 J.L. Lancaster, L. Rainey, J.L. Summerlin, C.S. Freitas, P.T. Fox, A.C. Evans, A.W. Toga, and J.C.  
16 Mazziotta. Automated labeling of the human brain: A preliminary report on the development and  
17 evaluation of a forward-transform method. *Human Brain Mapping*, 5:238–242, 1997.
- 18 J.L. Lancaster, M.G. Woldorff, L.M. Parsons, M. Liotti, C.S. Freitas, L. Rainey, P.V. Kochunov, D. Nick-  
19 erson, S.A. Mikiten, and P.T. Fox. Automated talairach atlas labels for functional brain mapping.  
20 *Human Brain Mapping*, 10:12–131, 2000.
- 21 K. Lange. Brain correlates of early auditory processing are attenuated by expectations for time and  
22 pitch. *Brain and Cognition*, 69(1):127–137, 2009.
- 23 R.W. Lansing. Relation of brain and tremor rhythms to visual reaction time. *Electroencephalography*  
24 *and clinical neurophysiology*, 9(3):497–504, 1957.
- 25 D.B. Lindsley. Psychological phenomena and the electroencephalogram. *Electroencephalography and*  
26 *clinical neurophysiology*, 4(4):443–456, 1952.
- 27 Yuelu Liu, Jesse Bengson, Haiqing Huang, George R Mangun, and Mingzhou Ding. Top-down modulation  
28 of neural activity in anticipatory visual attention: control mechanisms revealed by simultaneous EEG-  
29 fMRI. *Cerebral Cortex*, page bhu204, 2014.
- 30 M.D. Low, R. Borda, J. Frost, and P. Kellaway. Surface negative slow potential shift associated with  
31 conditioning in man. *Neurology*, 16:771–782, 1966.
- 32 H. Luo, X. Tian, K. Song, K. Shou, and D. Poeppel. Neural response phase tracks how listeners learn  
33 new acoustic representations. *Current Biology*, 23:968–974, 2013.
- 34 Huan Luo and David Poeppel. Phase patterns of neuronal responses reliably discriminate speech in  
35 human auditory cortex. *Neuron*, 54(6):1001–1010, 2007.
- 36 F. Macar and F. Vidal. The CNV peak: an index of decision making and temporal memory. *Psychophys-*  
37 *iology*, 40:950–954, 2003.

- 1 S. Makeig, A.J. Bell, T.P. Jung, and T.J. Sejnowski. Independent component analysis of electroen-  
2 cephalographic data. In D.S. Touretzky, M.C. Mozer, and M.E. Hasselmo, editors, *Advances in neural*  
3 *information processing systems 8*, Cambridge MA, 1996. MIT Press.
- 4 S. Makeig, M. Westerfield, T.P. Jung, J. Covington, J. Townsend, T. J. Sejnowski, and E. Courchesne.  
5 Functionally independent components of the late positive event-related potential during visual spatial  
6 attention. *The journal of neuroscience*, 19(7):2665–2680, 1999.
- 7 S. Makeig, M. Westerfield, T.P. Jung, S. Enghoff, J. Townsend, E. Courchesne, and T.J. Sejnowski.  
8 Dynamic brain sources of visual evoked responses. *Science*, 295(5555):690–694, 2002.
- 9 S. Makeig, . Debener, J. Onton, and A. Delorme. Mining event-related brain dynamics. *Trends in*  
10 *cognitive sciences*, 8(5):204–210, 2004.
- 11 K.V. Mardia. *Statistics of directional data*. Academic Press, New York, NY, 1972.
- 12 K.E. Mathewson, G. Gratton, M. Fabiani, D.M. Beck, and T. Ro. To see or not to see: prestimulus  
13 *alpha* phase predicts visual awareness. *The Journal of Neuroscience*, 29(9):2725–2732, 2009.
- 14 K.E. Mathewson, A. Lleras, D.M. Beck, M. Fabiani, T. Ro, and G. Gratton. Pulsed out awareness: EEG  
15 *alpha* oscillations represent a pulsed-inhibition of ongoing cortical processing. *Frontiers in Psychology*,  
16 2:1–15, 2011.
- 17 K.E. Mathewson, C. Prudhomme, M. Fabiani, D.M. Beck, A. Lleras, and G. Gratton. Making waves in  
18 the stream of consciousness: entraining oscillations in EEG *alpha* and fluctuations in visual awareness  
19 with rhythmic visual stimulation. *Journal of cognitive neuroscience*, 24(12):2321–2333, 2012.
- 20 Kyle E Mathewson, Diane M Beck, Tony Ro, Edward L Maclin, Kathy A Low, Monica Fabiani, and  
21 Gabriele Gratton. Dynamics of *alpha* control: preparatory suppression of posterior *alpha* oscillations by  
22 frontal modulators revealed with combined EEG and event-related optical signal. *Journal of cognitive*  
23 *neuroscience*, 26(10):2400–2415, 2014.
- 24 MATLAB. *version 8.1.0.604 (2013a)*. The MathWorks Inc., Natick, Massachusetts, 2013.
- 25 W.C. McCallum and W.G. Walter. The effects of attention and distraction on the contingent negative  
26 variation in normal and neurotic subjects. *Electroencephalography and Clinical Neurophysiology*, 25:  
27 319–329, 1968.
- 28 G. Mento, V. Tarantino, M. Sarlo, and P.S. Bisiacchi. Automatic temporal expectation: a high-density  
29 event-related potential study. *PLOS ONE*, 8(5):1–11, 2013.
- 30 N. Metropolis and S. Ulam. The monte carlo method. *Journal of the American Statistical Association*,  
31 44(247):335–41, 1949.
- 32 A. Milton and C.W. Pleydell-Pearce. The phase of pre-stimulus *alpha* oscillations influences the visual  
33 perception of stimulus timing. *NeuroImage*, 133:53–61, 2016.
- 34 C. Miniussi, E.L. Wilding, J.T. Coull, and A.C. Nobre. Orienting attention in time: Modulation of brain  
35 potentials. *Brain*, 122:1507–1518, 1999.
- 36 T.M. Mitchell, S.V. Shinkareva, A. Carlson, K. Chang, V.L. Malave, R.A. Marson, and M.A. Just.  
37 Predicting human brain activity associated with the meaning of nouns. *Science*, 320(5880):1191–1195,  
38 2008.

- 1 S. Monto, S. Palva, J. Voipio, and J.M. Palva. Very slow EEG fluctuations predict the dynamics of  
2 stimulus detection and oscillation amplitudes in humans. *Journal of Neuroscience*, 28(33), 2008. doi:  
3 10.1523/JNEUROSCI.1910-08.2008.
- 4 Benjamin Morillon, Catherine Liégeois-Chauvel, Luc H Arnal, Christian-G Bénar, and Anne-Lise Giraud.  
5 Asymmetric function of theta and gamma activity in syllable processing: an intra-cortical study.  
6 *Frontiers in psychology*, 3, 2012.
- 7 H. Müller-Gethmann, R. Ulrich, and G. Rinkenauer. Locus of the effect of temporal preparation: Evidence  
8 from the lateralized readiness potential. *Psychophysiology*, 40:597–611, 2003.
- 9 Nicholas E Myers, Mark G Stokes, Lena Walther, and Anna C Nobre. Oscillatory brain state predicts  
10 variability in working memory. *The Journal of Neuroscience*, 34(23):7735–7743, 2014.
- 11 R. Näätänen. The diminishing time-uncertainty with the lapse of time after the warning signal in  
12 reaction-time experiments with varying fore-periods. *Acta Psychologica*, 34:399–418, 1970.
- 13 L. Naccache, E. Blandin, and S. Dehaene. Unconscious masked priming depends on temporal attention.  
14 *Psychological Science*, 13(5):416–424, 2002.
- 15 T. Naselaris, R.J. Prenger, K.N. Kay, M. Oliver, and J.L. Gallant. Bayesian reconstruction of natural  
16 images from human brain activity. *Neuron*, 63:902–915, 2009.
- 17 T. Naselaris, K.N. Kay, S. Nishimoto, and J.L. Gallant. Encoding and decoding in fmri. *Neuroimage*,  
18 56:400–410, 2011.
- 19 T. Neuling, S. Rach, S. Wagner, C.H. Wolters, and C.S. Herrmann. Good vibrations: oscillatory phase  
20 shapes perception. *Neuroimage*, 63(2):771–778, 2012.
- 21 B.S.W. Ng, T. Schroeder, and C. Kayser. A precluding but not ensuring role of entrained low-frequency  
22 oscillations for auditory perception. *The Journal of Neuroscience*, 32(35):12268–12276, 2012.
- 23 L. F. Nicolas-Alonso and J. Gomez-Gil. Brain computer interfaces, a review. *Sensors*, 12:1211–1279,  
24 2012.
- 25 P. Niemi and R. Naatanen. Foreperiod and simple reaction time. *Psychological Bulletin*, 89(1):133–162,  
26 1981.
- 27 M.N. O’Connell, A. Falchier, T. McGinnis, C.E. Schroeder, and P. Lakatos. Dual mechanism of neuronal  
28 ensemble inhibition in primary auditory cortex. *Neuron*, 69(4):805–817, 2011.
- 29 J.A. Onton and S. Makeig. High-frequency broadband modulation of electroencephalographic spectra.  
30 *Frontiers in human neuroscience*, 3:61, 2009.
- 31 J.A. Palmer, K. Kreutz-Delgado, B.D. Rao, and S. Makeig. Modeling and estimation of dependent  
32 subspaces with non-radially symmetric and skewed densities. In M.E. Davies, C.J. James, A.A. Ab-  
33 dallah, and M.D. Plumbey, editors, *Proceedings of the 7th International Symposium on Independent*  
34 *Component Analysis*, Lecture Notes in Computer Science. Springer, 2007.
- 35 Hyojin Park, Robin AA Ince, Philippe G Schyns, Gregor Thut, and Joachim Gross. Frontal top-down  
36 signals increase coupling of auditory low-frequency oscillations to continuous speech in human listeners.  
37 *Current Biology*, 2015.

- Jonathan E Peelle, Joachim Gross, and Matthew H Davis. Phase-locked responses to speech in human auditory cortex are enhanced during comprehension. *Cerebral cortex*, 23(6):1378–1387, 2013.
- C.R. Pernet, N. Chauveau, C. Gaspar, and G.A. Rousselet. LIMO EEG: a toolbox for hierarchical Linear MOdeling of ElectroEncephaloGraphic data. *Computational Intelligence and Neurosciences*, 2011, 2011a.
- C.R. Pernet, P. Sajda, and G.A. Rousselet. Single-trial analyses: why bother? *Frontiers in Psychology*, 2, 2011b.
- C.R. Pernet, R. Wilcox, and G.A. Rousselet. Robust correlation analyses: false positive power validation using a new open source matlab toolbox. *Frontiers in psychology*, 3, 2013.
- M. Pfeuty, R. Ragot, and V. Pouthas. When time is up: CNV time course differentiates the roles of the hemispheres in the discrimination of short tone durations. *Experimental Brain Research*, 151:372–379, 2003.
- M. Pfeuty, R. Ragot, and V. Pouthas. Relation between the CNV and timing of an upcoming event. *Neuroscience Letters*, 382:106–111, 2005.
- S.M. Polyn, V.S. Natu, J.D. Cohen, and K.A. Norman. Category-specific cortical activity precedes retrieval during memory search. *Science*, 310:1963–1966, 2005.
- P. Praamstra, D. Kourtis, H.F. Kwok, and R. Oostenveld. Neurophysiology of implicit timing in serial choice reaction-time performance. *Journal of Neurosciences*, 26:5448–5455, 2006.
- R Core Team. *R: A Language and Environment for Statistical Computing*. R Foundation for Statistical Computing, Vienna, Austria, 2012. URL <http://www.R-project.org/>. ISBN 3-900051-07-0.
- J. Rapela. Derivation of variational bayes linear regression. Technical report, University of California San Diego, 2016.
- J. Rapela, J.M. Mendel, and N.M. Grzywacz. Estimating nonlinear receptive fields from natural images. *Journal of Vision*, 6(4):441–474, 2006.
- J. Rapela, G. Felsen, J. Touryan, J.M. Mendel, and N.M. Grzywacz. ePPR: a new strategy for the characterization of sensory cells from input/output data. *Network: Computation in Neural Systems*, 21(1-2):35–90, 2010.
- L. Reey, N. Tsuchiya, and T. Serre. Reading the mind's eye: decoding category information during mental imagery. *Neuroimage*, 50:818–825, 2010.
- D Regan. Some characteristics of average steady-state and transient responses evoked by modulated light. *Electroencephalography and clinical neurophysiology*, 20(3):238–248, 1966.
- D.M. Rice and E.C. Hagstrom. Some evidence in support of a relationship between human auditory signal-detection performance and the phase of the alpha cycle. *Perceptual and motor skills*, 1989.
- B. Rolke. Temporal peraption facilitates perceptual identification of letters. *Perception and Psychophysics*, 70:1305–1313, 2008.
- V. Romei, J. Gross, and G. Thut. Sounds reset rhythms of visual cortex and corresponding human visual perception. *Current Biology*, 22:807–813, May 2012.

- 1 P. Sajda, M.G. Philiastides, and L.C. Parra. Single-trial analysis of neuroimaging data: inferring neural  
2 networks underlying perceptual decision-making in the human brain. *Biomedical Engineering, IEEE*  
3 *Reviews in*, 2:97–109, 2009.
- 4 Maryam Saleh, Jacob Reimer, Richard Penn, Catherine L Ojakangas, and Nicholas G Hatsopoulos. Fast  
5 and slow oscillations in human primary motor cortex predict oncoming behaviorally relevant cues.  
6 *Neuron*, 65(4):461–471, 2010.
- 7 Jason Samaha, Phoebe Bauer, Sawyer Cimaroli, and Bradley R Postle. Top-down control of the phase of  
8 alpha-band oscillations as a mechanism for temporal prediction. *Proceedings of the National Academy*  
9 *of Sciences*, 112(27):8439–8444, 2015.
- 10 A.F. Sanders. *Elements of human performance: Reaction processes and attention in human skill*.  
11 Lawrence Erlbaum, Mahwah, NJ, 1998.
- 12 P. Sauseng, W. Klimesch, W.R. Gruber, and N. Birbaumer. Cross-frequency phase synchronizaton: a  
13 brain mechanism of memory matching and attention. *Neuroimage*, 40:308–317, 2008.
- 14 C.E. Schroeder and P. Lakatos. Low-frequency neuronal oscillations as instruments of sensory selection.  
15 *Trends in Neurosciences*, 32(1):9–18, 2009.
- 16 J.T. Serences and G.M. Boynton. The representation of behavioral choice for motion in human visual  
17 cortex. *Journal of Neurosciences*, 27:12893–12899, 2007.
- 18 Maxine T Sherman, Ryota Kanai, Anil K Seth, and Rufin VanRullen. Rhythmic influence of top-  
19 down perceptual priors in the phase of prestimulus occipital alpha oscillations. *Journal of cognitive*  
20 *neuroscience*, 2016.
- 21 E. Spaak, F.P. de Lange, and O Jensen. Local entrainment of alpha oscillations by visual stimuli causes  
22 cyclic modulation of perception. *J Neurosci*, 34(10):3536–44, 2014.
- 23 G. Stefanics, B. Hangya, I. Hernádi, I. Winkler, P. Lakatos, and I. Ulbert. Phase entrainment of human  
24 delta oscillations can mediate the effects of expectation on reaction speed. *The Journal of Neuro-*  
25 *sciences*, 30(41):13578–13585, 2010.
- 26 C. Tallon Baudry, O. Bertrand, C. Delpuech, and J. Pernier. Stimulus specificity of phase-locked and  
27 non-phase-locked 40 hz visual responses in human. *Journal of Neuroscience*, 16:4240–4349, 1996.
- 28 J.J. Tecce. Contingent negative variation (CNV) and psychological processes in man. *Psychological*  
29 *bulletin*, 77(2):73–108, 1972.
- 30 The Inkscape Team. Inkscape, 2004. URL <http://www.inkscape.org>.
- 31 J.D. Thorne, M. De Vos, F. Campos Viola, and S. Debener. Cross-modal phase reset predicts auditory  
32 task performance in humans. *The Journal of Neuroscience*, 31(10):3853–3861, 2011.
- 33 G. Thut, C. Miniussi, and J. Gross. The functional importance of rhythmic activity in the brain. *Current*  
34 *Biology*, 22(16), 2012. doi: 10.1016/j.cub.2012.06.061.
- 35 F. Tong and M.S. Pratte. Decoding patterns of human brain activity. *Annual Review of Psychology*, 63:  
36 483–509, 2012.
- 37 L. Torvalds. The linux kernel, 2008. URL <http://www.kernel.org>.

- 1 J.L. Trimble and A.M. Potts. Ongoing occipital rhythms and ver. i. stimulation at peaks of the alpha-  
2 rhythms. *Investigative Ophthalmology*, 18:537–546, 1975.
- 3 Francisco J Valera, Alfredo Toro, E Roy John, and Eric L Schwartz. Perceptual framing and cortical  
4 alpha rhythm. *Neuropsychologia*, 19(5):675–686, 1981.
- 5 A. Vallesi, A. Mussoni, M. Mondani, R. Budai, M. Skrap, and T. Shallice. The neural basis of temporal  
6 preparation: insights from brain tumor patients. *Neuropsychologia*, 45(12):2755–2763, 2007.
- 7 A. Vallesi, A.R. McIntosh, T. Shallice, and D.T. Stuss. When time shapes behavior: fmri evidence of  
8 brain correlates of temporal monitoring. *Journal of Cognitive Neuroscience*, 21(6):1116–1126, 2009.
- 9 Rosanne M van Diepen, Michael X Cohen, Damiaan Denys, and Ali Mazaheri. Attention and temporal  
10 expectations modulate power, not phase, of ongoing alpha oscillations. *Journal of cognitive neuro-  
11 science*, 2015.
- 12 G. van Elswijk, F. Maij, J.M. Schoffelen, S. Overeem, D.F. Stegeman, and P. Fries. Corticospinal beta-  
13 band synchronization entails rhythmic gain modulation. *Journal of Neurosciences*, 30(12):4481–4488,  
14 2010.
- 15 R. VanRullen and C. Koch. Is perception discrete or continuous? *Trends in cognitive science*, 7(5):  
16 207–213, 2003.
- 17 R. VanRullen, N.A. Busch, J. Drewes, and J. Dubois. Ongoing EEG phase as a trial-by-trial predictor  
18 of perceptual and attentional variability. *Frontiers in Psychology*, 2, 2011.
- 19 Rufin VanRullen, Benedikt Zoefel, and Barkin Ilhan. On the cyclic nature of perception in vision versus  
20 audition. *Philosophical Transactions of the Royal Society B: Biological Sciences*, 369(1641):20130214,  
21 2014.
- 22 B. Voytek, R.T. Canolty, A. Shestyuk, N.E. Crone, J. Parvizi, and R.T. Knight. Shifts in gamma phase-  
23 amplitude coupling frequency from theta to alpha over posterior cortex during visual tasks. *Frontiers  
24 in human neuroscience*, 4, 2010.
- 25 W.G. Walter. Slow potential changes in the human brain associated with expectancy, decision, and  
26 intention. In W. Cobb and C. Morocutti, editors, *The evoked potentials*. Elsevier, Amsterdam, 1967.
- 27 W.G. Walter, R. Cooper, V.J. Aldridge, W.C. McCallum, and A.L. Winter. Contingent negative varia-  
28 tion: an electrical sign of sensorimotor association and expectancy in the human brain. *Nature*, 203:  
29 380–384, 1964.
- 30 Peter H Westfall and S Stanley Young. *Resampling-based multiple testing: Examples and methods for  
31 p-value adjustment*, volume 279. John Wiley & Sons, 1993.
- 32 R. Wilcox. *Introduction to robust estimation and hypothesis testing*. Academic Press, New York, NY,  
33 2012.
- 34 R. Wolpaw, N. Birbaumer, D. J. McFarland, G. Pfurtscheller, and T. M. Vaughan. Brain-computer  
35 interfaces for communication and control. *Clinical Neurophysiology*, 113:767–791, 2002.
- 36 H. Woodrow. The measurement of attention. *The Psychological Monographs*, 17(5):i–158, 1914.
- 37 W. Wundt. *Grunzüge der physiologischen psychologie*. Leipzig: W. Engelman, 1874.

- 1 Juanjuan Xiang, David Poeppel, and Jonathan Z Simon. Physiological evidence for auditory modulation  
2 filterbanks: Cortical responses to concurrent modulations. *The Journal of the Acoustical Society of*  
3 *America*, 133(1):EL7–EL12, 2013.
- 4 N. Yamagishi, D.E. Callan, S.J. Anderson, and M. Kawato. Attentional changes in pre-stimulus oscillatory  
5 activity within early visual cortex are predictive of human visual performance. *Brain Research*, 1197:  
6 115–122, 2008.
- 7 R. Zappoli, A. Versari, F. Zappoli, R. Chiaramonti, G.D. Zappoli-Thyrion, M. Grazia-Arneodo, and  
8 V. Zeraushek. The effects on auditory neurocognitive evoked responses and cognitive negative varia-  
9 tion activity of frontal cortex lesions or ablations in man: three new case studies. *International Journal*  
10 *of Psychophysiology*, 38:109–144, 2000.
- 11 E.M. Zion Golumbic, N. Ding, S. Bickel, P. Lakatos, C.A. Schevon, G.M. McKhann, R.R. Goodman,  
12 R. Emerson, A.D. Mehta, J.Z. Simon, D. Poeppel, and C.E. Schroeder. Mechanisms underlying  
13 selective neuronal tracking of attended speech at a “cocktail party”. *Neuron*, 77(5):980–991, 2013.
- 14 Benedikt Zoefel and Rufin VanRullen. Selective perceptual phase entrainment to speech rhythm in the  
15 absence of spectral energy fluctuations. *The Journal of Neuroscience*, 35(5):1954–1964, 2015a.
- 16 Benedikt Zoefel and Rufin VanRullen. The role of high-level processes for oscillatory phase entrainment  
17 to speech sound. *Frontiers in human neuroscience*, 9, 2015b.
- 18 Benedikt Zoefel and Rufin VanRullen. Eeg oscillations entrain their phase to high-level features of speech  
19 sound. *NeuroImage*, 124:16–23, 2016.
- 20 Johanna M Zumer, René Scheeringa, Jan-Mathijs Schoffelen, David G Norris, and Ole Jensen. Occipital  
21 alpha activity during stimulus processing gates the information flow to object-selective cortex. *PLoS*  
22 *Biol.*, 12(10), 2014. doi: 10.1371/journal.pbio.1001965.



# A Appendix

## A.1 Controls on the SFP effect on ITPC

The previous sections demonstrated the existence of the **SFP** effect on **ITPC**, and argued for its relevance by showing that its strength correlates with subjects' perceptual abilities and reaction speeds. From the successful decoding of **SFPDs** from the **ITPC** following the presentation of standards we inferred that the **SFPD** (i.e., the modulation variable) modulates the **ITPC** evoked by standards (i.e., the modulated variable). Below we present evidence supporting the inference that the modulated variable is the **ITPC** evoked by standard stimuli (Section A.1.1), and that the modulating variable is the **SFPD** (Section A.1.2).

### A.1.1 The ITPC triggered by standards is the modulated variable

Besides the presentation of standards, any other experimental event (e.g., the presentation of a **warning signal**) could have generated **ITPC** modulations that allowed models to decode, from a 500 ms-long segment of phase coherence starting at time  $t_0$  after the presentation of a **warning signal**, that the **warning signal** was presented  $t_0$  ms before the start of the segment. We tested this possibility by building surrogate datasets, identical to the original ones, with the exception that epochs were aligned to random times, instead of being aligned to the presentation time of standards, and then fitting decoding models to these surrogate datasets.

For each epoch in an original dataset we built a corresponding epoch in the corresponding surrogate dataset. To construct the surrogate epoch, the onset time of the standard on the original dataset was shifted by a random number between a minimum and a maximum value. The minimum value was the negative of the **SFPD**, in order to guarantee that the surrogate standard onset occurred after the previous **warning signal**. The maximum value was the minimum among the latency of the next deviant and the latency of the next **warning signal**, minus 500 ms. In this way a surrogate standard occurred before the next deviant and the next **warning signal**, and neither deviants or **warning signals** appeared in the 500 ms-long window used to decode the **SFPD**. Since the onset time of standards determines the **DMP** values used as independent variables in the linear regression model (Section A.5.7), the surrogate datasets only randomized the independent variables of this model. In the surrogate datasets, the distribution of phases at every moment in time was not significantly different from the uniform distribution ( $p > 0.01$ , Raleigh test). In the main analysis, to decode **SFPDs**, we only used **DMP** values at time points at which the distribution of phases was significantly different from the uniform distribution. If we had applied this same criterion with the surrogate epochs we would have no time points to decode **SFPDs**. Thus, for epochs in surrogate datasets we used the same time points as in the original epochs to decode **SFP** durations.

For each original dataset, we repeated the above randomization 30 times. For each surrogate dataset, we fitted a decoding model (in exactly the same way as with the original dataset), and computed the correlation coefficient between the model decodings and the **SFPDs**. We used the median of these 30 correlation coefficients to measure the decoding power of models fitted to surrogate datasets. For models derived from **ICs** in the left parieto-occipital cluster 04 and the attended visual standards, Figure A.1a plots the decoding power of models fitted to the original dataset versus that of models fitted to surrogate datasets. The decoding power of models fitted to the original dataset was significantly larger than that of models fitted to surrogate datasets. The median pairwise difference between the decoding power of models fitted original datasets minus that of models fitted to surrogate datasets was 0.21, which was significantly larger than zero (95% confidence interval [0.17, 0.25]).

Note that the estimation of the decoding power for models fitted to surrogate datasets was computationally very expensive. For each cluster, **standard modality**, and **attended modality**, we fitted approximately 28,500 models, corresponding to 19 subjects  $\times$  around 50 maximal **SFPDs** to select the

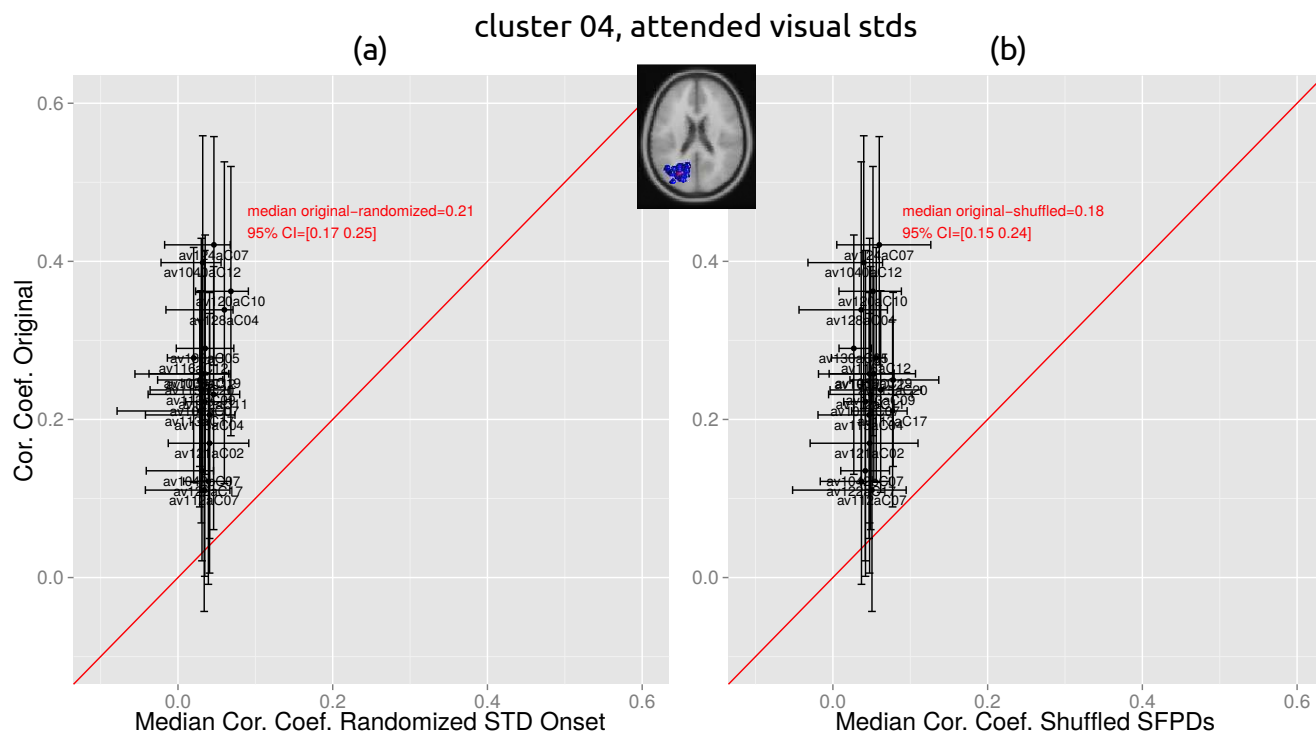

Figure A.1: Controls on the **SFP** effect on **ITPC**. Panel (a) plots correlation coefficients for models fitted to original datasets, with epochs aligned to the presentation time of standards, versus correlation coefficients for models fitted to surrogate datasets, with epochs aligned to random times. Panel (b) is as panel (a) but for surrogate datasets with **SFPDs** shuffled among trials. Both panels correspond to the left parieto-occipital cluster 04 and attended visual standards. Correlations for models fitted to original datasets are significantly larger than those from models fitted to surrogate datasets, supporting our assumption that in the **SFP** effect on **ITPC** the **ITPC** triggered by standards is the modulated variable (panel (a)) and that the **SFPD** is the modulating variable (panel (b)).

1 optimal one (Section A.4)  $\times$  30 repetitions of the randomization procedure. For this reason, we limited  
2 this control to one representative cluster, **standard modality**, and **attended modality**.

3 This control supports the claim that the **ITPC** evoked by standards is the experimental variable  
4 modulated by the **SFPD**. In particular, it constitutes evidence against the possibility that the observed  
5 modulations on **ITPC** were evoked by the **warning signal**, since in this case modulations of **ITPC** by the  
6 **warning signal** should not be affected by the randomization of the onsets of standards.

### 7 **A.1.2 The SFP duration is the modulating variable**

8 It is possible that from the **DMP** values triggered by standards one could reliably decode any variable,  
9 and not only the **SFPD**. This would be the case, for example, if the decoding model were overfitted to the  
10 data. Note, however, that the estimation and the model evaluation methods used here were designed to  
11 avoid overfitting (i.e., we used a regularized error function for parameter estimation, Section A.5.8, and  
12 cross-validation to evaluate the goodness of fit of models, Section A.5.14). To control for this possibility,  
13 we proceed as in Section A.1.1, but with surrogate datasets with shuffled **SFPDs**. That is, instead of  
14 assigning to each trial its corresponding **SFPD**, we assigned the **SFPD** of a randomly chosen (without  
15 replacement) trial. Since the **SFP** is the dependent variable in the linear regression model (Section A.5.7),  
16 the surrogate dataset only shuffled the dependent values of this model.

17 Figure A.1b is as Figure A.1a, but for control models estimate from surrogate datasets with shuffled  
18 **SFPDs**. The decoding power of models estimated from original datasets was significantly larger than  
19 that of models estimated from the shuffled surrogate datasets. The median pairwise difference between  
20 the correlation coefficient for a model estimated from the original dataset minus that for a model es-  
21 timated from the corresponding surrogate dataset was 0.18, which was significantly different from zero  
22 (95% confidence interval: [0.15, 0.24]). Thus, Figure A.1b supports the inference that the **SFPD** is the  
23 experimental variable modulating the **ITPC** elicited by standards.

## 24 **A.2 Correlations between ITC and behavior**

25 For each **IC** in a cluster and for a given **standard modality** and **attended modality** we extracted the  
26 **ITC** value at the peak time and frequency (Section A.5.4). Then we computed the correlation coef-  
27 ficient between peak **ITC** values of **ICs** and error rates or mean reaction times of the subjects corre-  
28 sponding to the **ICs**. Tables A.1 and A.2 show the obtained correlation coefficients and corresponding  
29 p-values for error rates and mean reaction times, respectively, across all clusters, **standard modalities**,  
30 and **attended modalities**. Highlighted in blue are entries with uncorrected p-values smaller than 0.05.  
31 A double dagger (dagger) below the image of a cluster in Figure A.2 indicates a significant correlation  
32 between peak **ITC** values and error rates (mean reaction times) in the corresponding cluster and in the  
33 **standard modality** and **attended modality** given by the color of the double dagger (dagger).

## 34 **A.3 Simulations of the SFP effect on ITPC**

35 We simulated the model in Eq. 1 twice, with the precision of the phase noise  $n$  displaying larger  
36 ( $\max\kappa=5.00$ ,  $\min\kappa=0.01$ ) and smaller ( $\max\kappa=3.50$ ,  $\min\kappa=1.51$ ) oscillations and with parameters  $f =$   
37  $7\text{ Hz}$ ,  $\theta = \pi$ ,  $f_n = 3\text{ Hz}$ , and  $s = 2$ . For these simulations we used the **SFPDs**, **SFPD** in Eq. 1, from  
38 one experimental session (subject av124a and attended visual standards). The simulated oscillations are  
39 shown in Figure A.3 as an erpimage (Makeig et al., 2004) sorted by **SFPDs** (black curve to the left of time  
40 zero). Figure A.3a and A.3b correspond to larger and smaller fluctuations in the precision of the phase  
41 noise, respectively. Figure A.4 is as Figure 4 but for the simulated data. The fluctuations in averaged  
42 **DMP** in trials closest to and furthest from the **warning signal**, those in their difference, and fluctuations

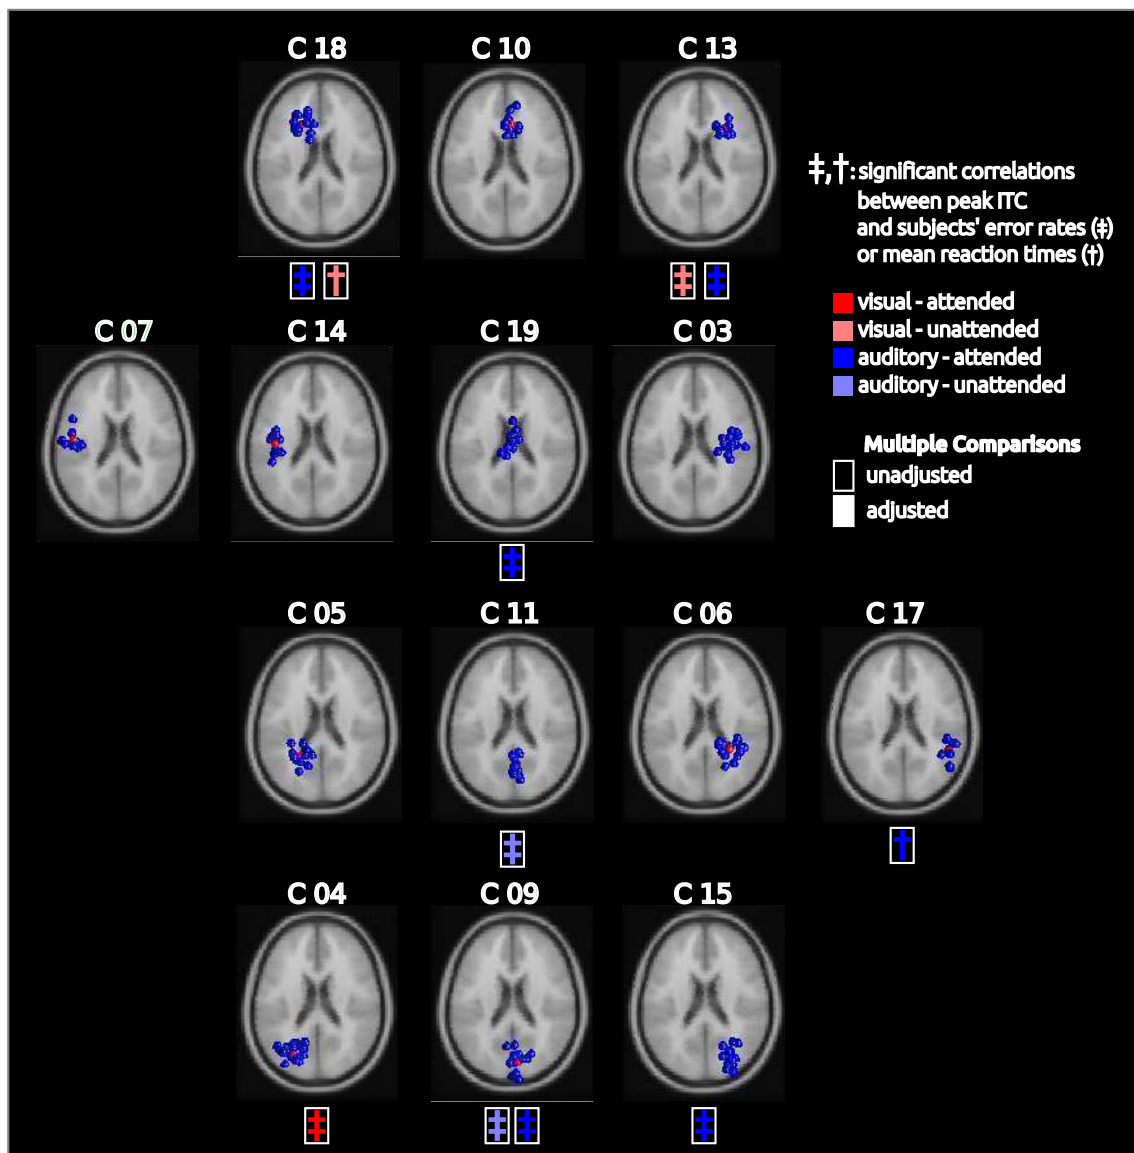

Figure A.2: Clusters of ICs, and correlations between peak ITC values and subjects' behaviors. A dagger (double dagger) shows a significant correlation, unadjusted for multiple comparisons, between peak ITC values and subjects' mean reaction times (error rates). With the exception of the left parieto-occipital cluster 04 and attended visual standards, significant correlations between peak ITC values and subjects' behaviors occur in different clusters, **standard modalities** and **attended modalities**, than correlations between models' decodings and subjects' behaviors (Figure 3).

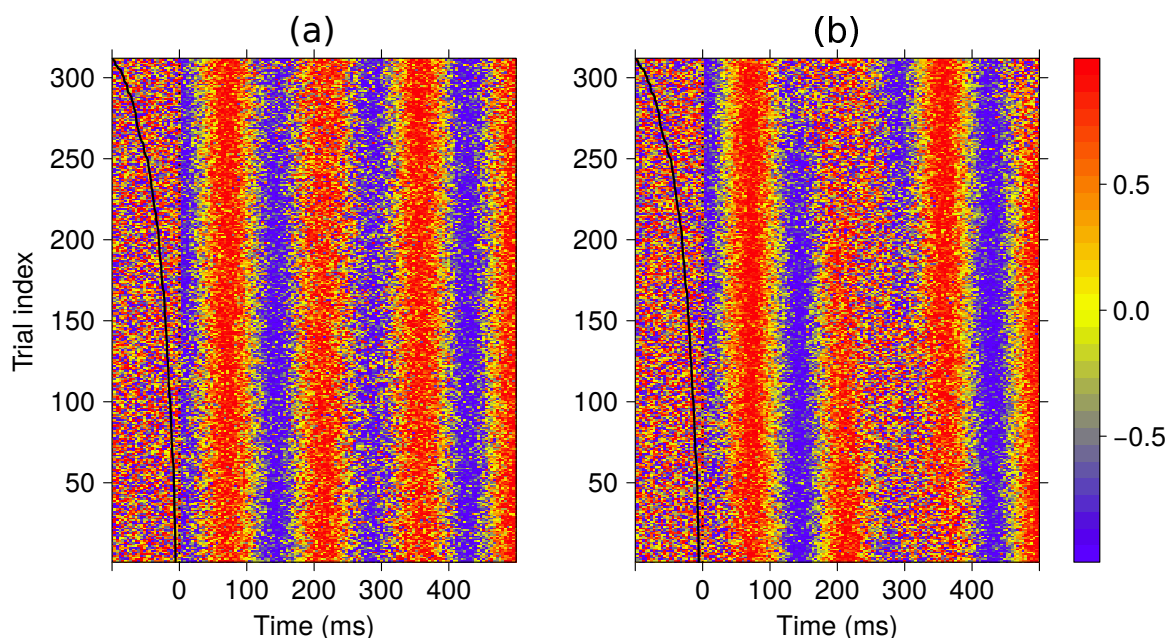

Figure A.3: Oscillations simulated according to Eq. 1 with phase noise  $n$  having small ( $\min \kappa = 1.51$ ,  $\max \kappa = 3.5$ , panel (a)) and large ( $\min \kappa = 0.01$ ,  $\max \kappa = 5.0$ , panel (b)) fluctuations in precision (Eq. 3).

1 in the estimated model coefficients are similar for the simulated and experimental data. The correlation  
2 coefficient for the model fitted to data with smaller fluctuations of the precision of the noise was  $r = 0.23$   
3 (95% CI=[0.12, 0.34]), which was significantly smaller than that for the model fitted to data with larger  
4 fluctuations of the precision of the noise  $r = 0.51$  (95% CI=[0.43, 0.59]).

#### 5 A.4 Selection of the optimal maximum SFPD

6 To fit decoding models we used data from standards that were presented before an optimal maximum  
7 SFPD after the warning signal. For models fitted to data from IC 05 of subject av130a, and unattended  
8 visual standards, Figure A.5 plots the decoding power of models as a function on their maximum SFPD.  
9 We see that the decoding power of models varied smoothly as a function of this maximum SFPD. For each  
10 estimated model we selected the maximum SFPD that optimized the decoding power of the model as the  
11 optimal maximum SFPD. We chose maximum SFPDs between one second and the largest SFPD of any  
12 trial in the data, since maximum SFPDs shorter than one second may be contaminated by modulations  
13 from the nearby warning signal. For IC 05 of subject av130a and unattended visual standards, we selected  
14 an optimal maximum SFP duration of 2.8 seconds (time highlighted in red in Figure A.5).

15 The optimal maximum SFPD gives the range of SFPDs at which modulations of ITPC by the SFPD  
16 are stronger. The mean of the optimal maximum SFPD for models corresponding to the visual and  
17 auditory attended modality were 2.4 and 2.7 seconds, respectively. A repeated-measures ANOVA with  
18 optimal maximum SFPD as dependent variable found a significant main effect of attended modality ( $F(1,$   
19  $579)=8.45$ ,  $p=0.0038$ ). A posthoc analysis indicated that the mean of the optimal maximum SFPD was  
20 significantly shorter for models estimated from epochs where attention was directed to the visual than to  
21 the auditory modality ( $z=2.91$ ,  $p=0.0018$ ). Further information on this ANOVA appear in Section A.5.11.  
22 Therefore, modulations of ITPC by the SFPD were stronger earlier when attention is directed to the  
23 visual than to the auditory modality.

simulated av124a07, attended visual stds

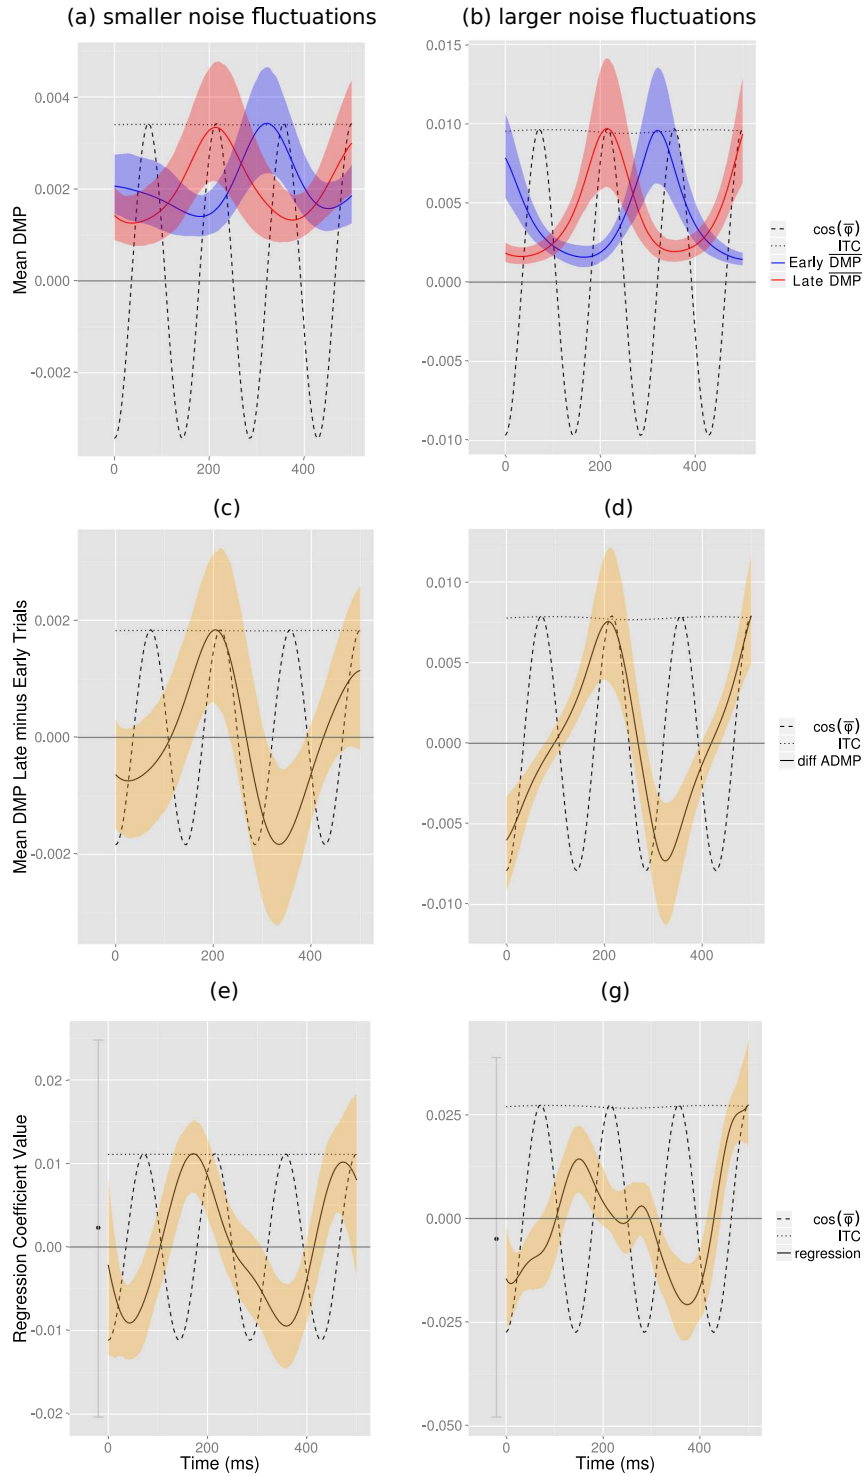

Figure A.4: Average **DMP** in trials furthest from and closest to the **warning signal** and regression coefficients for data simulated from Eq. 1. Same format as Figure 4. That the panels in this figure capture salient features of those in Figure 4, generated from neural recordings, suggests that the simple oscillatory model in Eq. 1 is a good first description of how the **SFPD** modulates the phase of neural oscillations.

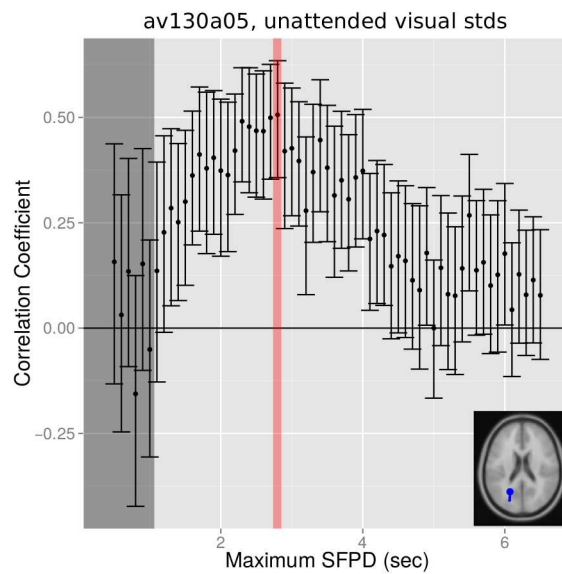

Figure A.5: Selection of the optimal maximum **SFPD** for the decoding model for **IC 05** of subject av130a and unattended visual standards. Decoding models were estimated with maximum **SFPDs** between 500 ms and the largest **SFPD** in a set of trials, in steps of 100 ms (abscissa), and the correlation coefficient were computed between models' decodings and experimental **SFPDs** (ordinate). The **SFPD** at which this correlation coefficient was largest was selected as the optimal maximum **SFPD** (red bar). To avoid possible modulations of the **ITPC** by the **warning signal**, we excluded from this selection **SFPDs** shorter than one second (gray bar).

In Section 5.3 we showed that the mean **SFPD** was significantly shorter in epochs where attention was directed to the visual than to the auditory modality. Coincidentally, in this section we demonstrated that the time window with the strongest modulations of **ITPC** by the **SFPD** occurred earlier when attention was directed to the visual than to the auditory modality. This coincidence suggests that subjects had learned the distribution of **SFPDs** and that their modulations of **ITPC** reflected this learning.

## A.5 Supplementary methods

### A.5.1 ICA data preprocessing

For each subject, we performed an ICA decomposition on his/her EEG recorded brain potentials (Makeig et al., 1996). Briefly, if  $\mathbf{x} \in \mathbb{R}^N$  is an  $N$ -dimensional random vector representing the EEG activity in  $N$  channels, we estimated a mixing matrix  $A \in \mathbb{R}^{N \times N}$  so that

$$\mathbf{x} = A\mathbf{s} \quad (\text{A.1})$$

and the components of the random vector  $\mathbf{s} \in \mathbb{R}^N$  were maximally independent. These components are called the independent components (**ICs**) through the manuscript. We used the AMICA algorithm (Palmer et al., 2007) with one model to compute this decomposition. Prior to the ICA decomposition, the EEG data was high- and low-pass filtered with cutoff frequencies of 1 and 50 Hz respectively. After this decomposition, non-brain **ICs** (e.g., components corresponding to eye blinks, lateral eye movements, muscle activity, bad channels, and muscle activity) were removed from the ICA decomposition. We kept, on average, of 26 components per subject, out of the  $N = 32$  components obtained in the ICA decomposition.

### A.5.2 Clustering of ICs

All **ICs** of all subjects were grouped into clusters according to the proximity of their equivalent dipole locations (see below) using the k-means algorithm. This algorithm groups points of a  $D$ -dimensional metric space into clusters, in such a way that the sum of the distances between points and their corresponding cluster centroid is minimized. We represented each **IC** by the three-dimensional point given by the Talairach coordinates of its equivalent dipole location. A free parameter in k-means is the number of clusters. We set this parameter to 17 to obtain clusters of reasonable coarseness. Clusters 8, 12, and 16 were not analyzed because they contained too few **ICs**, 4, 4 and 5, respectively (Table A.3).

#### Equivalent Dipole location

The scalp map of the  $i$ th **IC** is the  $i$ th column of the mixing matrix  $A$  in (A.1). For each **IC**, the location of the electric current dipole whose projection in the scalp best matched the **IC** scalp map was estimated using the DIPFIT2 plugin of the EEGLAB software. The location of this dipole is the equivalent dipole location of the **IC**.

### A.5.3 Circular statistics concepts

This section introduces concepts from circular statistics (Mardia, 1972) used below to define **ITC** and **DMP**. Given a set of circular variables (e.g., phases),  $\theta_1, \dots, \theta_N$ , we associate to each circular variable a two-dimensional unit vector. Using notation from complex numbers, the unit vector associated with variable  $\theta_i$  is:

$$\text{vec}(\theta_i) = e^{j\theta_i} \quad (\text{A.2})$$



1 The *resultant vector*,  $\mathbf{R}$ , is the sum of the associated unit vectors:

$$\mathbf{R}(\theta_1, \dots, \theta_N) = \sum_{i=1}^N \text{vec}(\theta_i) \quad (\text{A.3})$$

2 The *mean resultant length*,  $\bar{R}$ , is the length of the resultant vector divided by the number of variables:

$$\bar{R}(\theta_1, \dots, \theta_N) = \frac{1}{N} |\mathbf{R}(\theta_1, \dots, \theta_N)| \quad (\text{A.4})$$

3 The *circular variance*,  $CV$ , is one minus the mean resultant length:

$$CV(\theta_1, \dots, \theta_N) = 1 - \bar{R}(\theta_1, \dots, \theta_N) \quad (\text{A.5})$$

4 The *mean direction*,  $\bar{\theta}$ , is the angle of the resultant vector:

$$\bar{\theta}(\theta_1, \dots, \theta_N) = \arg(\mathbf{R}(\theta_1, \dots, \theta_N)) \quad (\text{A.6})$$

5 Note that the mean direction (and therefore the **DMP**) is not defined when the resultant vector is zero,  
6 since the angle of the zero vector is undefined.

#### 7 **A.5.4 ITC and Peak ITC frequency**

8 The Inter-Trial Coherence (ITC) is a measure of **ITPC** resulting from averaging phase information among  
9 multiple epochs (**Tallon Baudry et al., 1996; Delorme and Makeig, 2004**). To compute ITC we extracted  
10 epochs from one second before to three seconds after the presentation of standards. Then, a continuous  
11 wavelet transform was performed on these epochs, using the Morlet wavelet with three significant cycles,  
12 eight octaves, and 12 frequencies per octave. With a 250 Hz EEG sampling rate, the previous parameters  
13 furnished a Morlet transform with a time resolution of 70.71 ms, and a frequency resolution of 4.5 Hz,  
14 both at 10 Hz. The function `cwt` in the `Rwave` package of the language R (**R Core Team, 2012**) was used  
15 to compute the continuous wavelet transform. This transform provided the phases of every trial, for  
16 frequencies between 0.5 and 128 Hz, and for times between the start and end of the epoch. The **ITC**  
17 of a set of phases  $\theta_1, \dots, \theta_n$  (gray vectors in Figure 7) is the mean resultant length ( $\bar{R}$ , Eq. A.4) of these  
18 phases (length of black vector in Figure 7):

$$ITC(\theta_1, \dots, \theta_N) = \bar{R}(\theta_1, \dots, \theta_N) \quad (\text{A.7})$$

19 For each **IC** of every subject, **standard modality**, and **attended modality**, we used the corresponding  
20 set of epochs to calculate **ITC** values between the start and end times of the epochs, and between 0.5 Hz  
21 to 125 Hz. We selected the peak of these values between 100 and 500 ms after the presentation of the  
22 standard at time zero, and between 1 and 14 Hz. The frequency corresponding to this peak (i.e., the peak  
23 **ITC** frequency) was then used to measure the single-trial phase values, as described in Section A.5.5. The  
24 median peak **ITC** frequency and its 95% confidence interval were 4.93 Hz and [4.59, 5.21] Hz, respectively,  
25 and the median time of the **ITC** peak and its 95% confidence interval were 215 ms and [212, 226] ms,  
26 respectively. **ITC** values between -200 and 500 ms around the presentation of attended visual standards,  
27 from **IC** 5 of subject av130a are shown in Figure A.6. The black cross in this figure marks the peak **ITC**  
28 value, occurring at peak frequency 8.15 Hz.

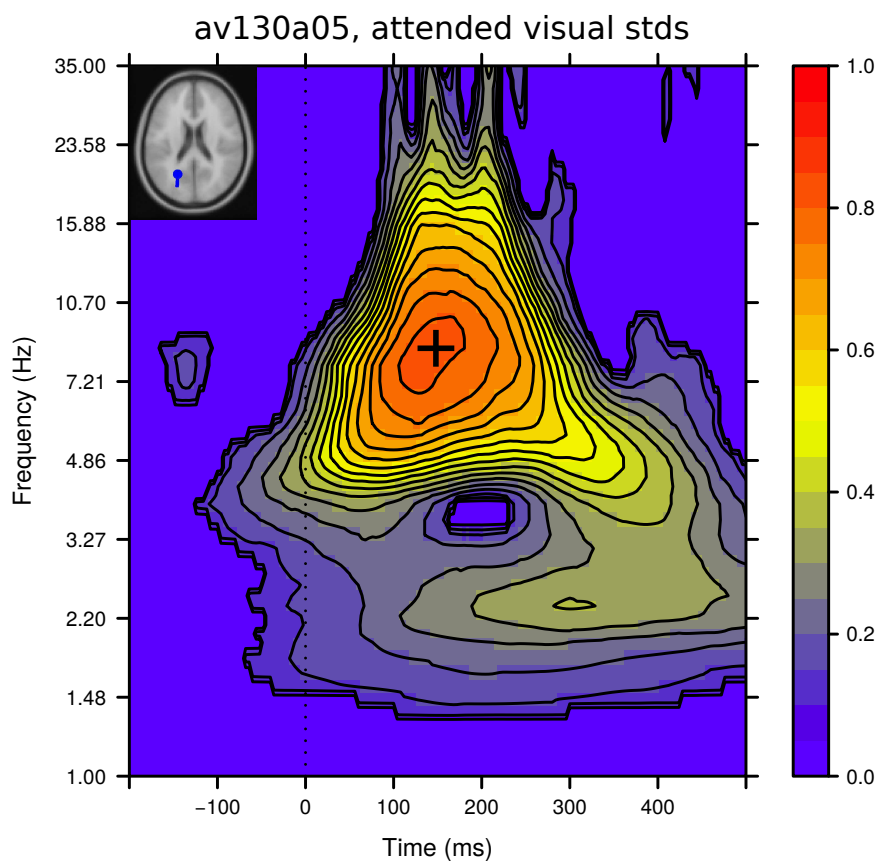

Figure A.6: Example set of ITC values and selected peak from IC 05 of subject av130a and attended visual standards. The peak ITC value (black cross) was selected between 100 and 500 ms and between 1 and 14 Hz. The selected peak ITC frequency, time, and amplitude were 8.52 Hz, 148 ms, and 0.83, respectively. Non-significant ITC values ( $p > 0.01$ , Rayleigh uniformity test) are masked in light blue.

### A.5.5 Measuring phases in single trials

After selecting the peak **ITC** frequency (Section A.5.4) for an **IC** of a subject, a **standard modality**, and an **attended modality**, we computed a Gabor transform of all epochs. These epochs started one second before and ended three seconds after the presentation of standards. For this calculation, we used the function `cgt` in the `Rwave` package of the language R (R Core Team, 2012). We adjusted the scale of the Gabor's Gaussian window to obtain three significant sinusoids at the frequency of the Gabor transform. The phases of single trials were extracted from the complex coefficients of this Gabor transform. Figure 2c illustrates calculated phases for **IC** 13, of subject av124a, and unattended visual standards. Although we computed phases for the whole epoch duration, between -1 and 3 seconds, this figure only shows phases between -100 and 500 ms. To avoid border effects, epochs were clipped to their final size, between 0 and 500 ms, after the computation of this Gabor transform.

### A.5.6 Relation between the averaged DMP and the ITC

The **DMP** is a measure of phase decoherence, while the **ITC** is a measure of phase coherence. Here we derive an upper bound for the averaged **DMP**,  $\overline{DMP}$ , by the **ITC** (Proposition 1). From this bound we infer that to minimal values of the  $\overline{DMP}$  (i.e.,  $\overline{DMP} \simeq 0$ ) correspond large values of **ITC** (i.e.,  $ITC \simeq 1$ ), and that the maximal value of the  $\overline{DMP}$  is  $1/2$ .

**Proposition 1.**  $\overline{DMP} \leq \frac{1}{2} - \frac{ITC}{2}$

*Proof.* We first rewrite DMP

$$\begin{aligned}
 DMP(\theta_i | \{\theta_1, \dots, \theta_N\}) &= CV(\theta_i, \bar{\theta}(\theta_1, \dots, \theta_N)) \\
 &= 1 - \bar{R}(\theta_i, \bar{\theta}(\theta_1, \dots, \theta_N)) \\
 &= 1 - \frac{1}{2} |\mathbf{R}(\theta_i, \bar{\theta}(\theta_1, \dots, \theta_N))| \\
 &= 1 - \frac{1}{2} |vec(\theta_i) + vec(\bar{\theta}(\theta_1, \dots, \theta_N))| \tag{A.8}
 \end{aligned}$$

The first equality comes from Eq. 5, the second one from Eq. A.5, the third one from Eq. A.4, and the fourth one from Eq. A.3. We also rewrite  $vec(\bar{\theta}(\theta_1, \dots, \theta_N))$ :

$$\begin{aligned}
 vec(\bar{\theta}(\theta_1, \dots, \theta_N)) &= vec(\arg(\mathbf{R}(\theta_1, \dots, \theta_N))) \\
 &= \frac{\mathbf{R}(\theta_1, \dots, \theta_N)}{|\mathbf{R}(\theta_1, \dots, \theta_N)|} \\
 &= \frac{\mathbf{R}(\theta_1, \dots, \theta_N)}{N \bar{R}(\theta_1, \dots, \theta_N)} \tag{A.9}
 \end{aligned}$$

The first equality comes from Eq. A.6, the second one from the fact that  $vec$  applied to  $\arg$  of any vector gives the vector normalized to unit length, the third equality comes from Eq. A.4. Then,

$$\begin{aligned}
1 - \overline{DMP} &= 1 - \frac{1}{N} \sum_{i=1}^N DMP(\theta_i | \{\theta_1, \dots, \theta_N\}) \\
&= \frac{1}{2N} \sum_{i=1}^N |vec(\theta_i) + vec(\bar{\theta}(\theta_1, \dots, \theta_N))| \\
&\geq \frac{1}{2N} |\sum_{i=1}^N vec(\theta_i) + N vec(\bar{\theta}(\theta_1, \dots, \theta_N))| \\
&= \frac{1}{2N} \left| \mathbf{R}(\theta_1, \dots, \theta_N) + \frac{\mathbf{R}(\theta_1, \dots, \theta_N)}{\bar{R}(\theta_1, \dots, \theta_N)} \right| \\
&= \frac{1}{2N} \left( 1 + \frac{1}{\bar{R}(\theta_1, \dots, \theta_N)} \right) |\mathbf{R}(\theta_1, \dots, \theta_N)| \\
&= \frac{1}{2} \left( 1 + \frac{1}{\bar{R}(\theta_1, \dots, \theta_N)} \right) \bar{R}(\theta_1, \dots, \theta_N) \\
&= \frac{1}{2} (\bar{R}(\theta_1, \dots, \theta_N) + 1) \\
&= \frac{ITC}{2} + \frac{1}{2} \tag{A.10}
\end{aligned}$$

The first equality comes from the definition of  $\overline{DMP}$ , the second one from Eq. 5, the third one from the triangle inequality, the fourth one from Eq. A.3 and Eq. A.9, the fifth one from taking  $\mathbf{R}(\theta_1, \dots, \theta_N)$  as common factor, the sixth one from Eq. A.4, the seventh one from distributing  $\bar{R}(\theta_1, \dots, \theta_N)$ , and the eighth one from Eq. A.7. The proposition follows by re-arranging Eq. A.10.  $\square$

Because  $0 \leq DMP \leq 1$  it follows that  $0 \leq \overline{DMP} \leq 1$ . When **ITC** is maximal (i.e., **ITC**=1) Proposition 1 shows that  $\overline{DMP} \leq 0$ , thus  $\overline{DMP}$  must achieve its minimal value (i.e.,  $\overline{DMP} = 0$ ). Also, this proposition shows that 1/2 is an upper bound for  $\overline{DMP}$ , corresponding to zero **ITC**.

### A.5.7 Linear regression model

We used a linear regression model to decode the **SFPD** of trial  $n$ ,  $y[n]$ , from the samples of **DMP** values from this trial,  $x[n, \cdot]$ .

$$\hat{y}[n, \mathbf{w}] = \sum_{k=1}^K w[k] x[n, k] \tag{A.11}$$

where  $\hat{y}[n, \mathbf{w}]$  is the decoded **SFPD**,  $w[k]$  is a regression coefficient,  $x[n, k]$  is the **DMP** value for trial  $n$  at sample time  $k$ , and  $K$  is the number of sample points in the 500 ms-long time window following the presentation of standards for which the distribution of phases across trials was significantly different from the uniform distribution ( $p < 0.01$ ; Rayleigh test).

### A.5.8 Method to estimate the coefficients in the linear regression model

We seek coefficients  $\mathbf{w}$  in the linear regression model (Eq. A.11) such that the decodings of the model,  $\hat{y}[\cdot, \mathbf{w}]$ , are as close as possible to the experimental **SFPDs**,  $y[\cdot]$ . Mathematically, we estimate the regression coefficients  $\mathbf{w}$  that minimize the least-squares error function

$$MSE(\mathbf{w}) = \sum_{n=1}^N (y[n] - \hat{y}[n, \mathbf{w}])^2 \tag{A.12}$$

where  $N$  is the number of epochs. A difficulty in this estimation is that **DMP** values at neighboring sample points are highly correlated, and correlations increase the variance of ordinary least-squares estimates. In addition, the number of coefficients,  $K$  in (A.11), is comparable to, and in some cases even larger than, the number of epochs,  $N$  in (A.12). This further increases the variance of the ordinary least-squares estimates, and when  $K > N$  these estimates are not even defined. To address these problems here we use ridge regression (Hastie et al., 2009, Section 3.4.1), which adds a penalty constraint to the least-squares error function in Eq. A.12, shrinking coefficients estimates toward zero and therefore reducing their variability:

$$\text{RMSE}(\mathbf{w}) = \text{MSE}(\mathbf{w}) + \alpha \|\mathbf{w}\|^2 \quad (\text{A.13})$$

where  $\alpha$  determines the strength of the constraint (i.e., for larger values of  $\alpha$  the penalty constraint more strongly bias the coefficient estimates away from minimizing the least-squares error function in Eq. A.12 and toward zero). We call Eq. A.13 the ridge-regression error function.

To find the optimal value  $\mathbf{w}$  in Eq. A.13 we took a Bayesian approach (Bishop, 2006). We used a Gaussian likelihood function:

$$P(\mathbf{y}|\mathbf{w}, \tau, \Phi) = N(\mathbf{y}|\Phi\mathbf{w}, \tau^{-1}I) \quad (\text{A.14})$$

where  $\Phi$  is the matrix of **DMP** values (i.e.,  $\Phi[n, k] = x[n, k]$ ) and  $\tau$  is the constant precision of  $\mathbf{y}$ . We chose a normal-gamma prior for  $\mathbf{w}$  and  $\tau$ :

$$P(\mathbf{w}, \tau|\alpha) = N(\mathbf{w}|\mathbf{0}, (\tau\alpha)^{-1}I) \text{Gam}(\tau|a_0, b_0) \quad (\text{A.15})$$

a Gamma hyper-prior for the hyper-parameter  $\alpha$ :

$$P(\alpha) = \text{Gam}(\alpha|c_0, d_0) \quad (\text{A.16})$$

and searched for the values of  $\mathbf{w}$  that maximized the the log of the posterior distribution:

$$J(\mathbf{w}) = \log P(\mathbf{w}|\mathbf{y}, \tau, \alpha, \Phi) \quad (\text{A.17})$$

As we prove in Proposition 2, with this choice of likelihood function and priors, finding the coefficients that maximize the log of the posterior distribution in Eq. A.17 is equivalent to finding the coefficients that minimize the ridge-regression error function in Eq. A.13, as we set to do at the beginning of this section.

Due to the large dimensionality of  $\mathbf{w}$ , evaluating the posterior distribution in Eq. A.17 is not feasible and one needs to resort to approximation schemes (Bishop, 2006, Chapter 10). These approximations can be stochastic or deterministic. In principle, stochastic approximations, such as Markov Chain Monte Carlo (Metropolis and Ulam, 1949), can give exact evaluations of the posterior distribution, given infinite computational resources, but are often restricted to small-scale problems. Deterministic approximations, are based on approximations of the posterior distribution, and although can never generate exact results, scale well for large problems. Here we use the Variational Bayes deterministic approximation (Bishop, 2006), and implement it as described in Rapela (2016).

We applied a logarithmic transformation to the dependent variable,  $y[n]$ , in order to equalize the variance of the residuals (Kutner et al., 2005, Section 3.9), and standardized the dependent variable and

regressors to have zero mean and unit variance (Kutner et al., 2005, Section 7.5). Highly influential trials (i.e., trials with a Cook's distance larger than  $4/(N-K-1)$ , where  $N$  and  $K$  are the number of trials and regressors) were deleted before estimating the model parameters (Kutner et al., 2005, Section 10.4).

**Proposition 2.** *Given the likelihood function in Eq. A.14, and the priors in Eq. A.15 and Eq. A.16, the coefficients  $\mathbf{w}$  maximizing the logarithm of the posterior distribution  $J(\mathbf{w})$  in Eq. A.17 minimize the ridge-regression error function  $RMSE(\mathbf{w})$  in Eq. A.13.*

*Proof.* We first rewrite the joint pdf  $P(\mathbf{y}, \mathbf{w}, \tau, \alpha, \Phi)$  as:

$$\begin{aligned}
 P(\mathbf{y}, \mathbf{w}, \tau, \alpha, \Phi) &= P(\mathbf{y}|\mathbf{w}, \tau, \Phi)P(\mathbf{w}, \tau|\alpha)P(\alpha) \\
 &= N(\mathbf{y}|\Phi\mathbf{w}, \tau^{-1}I)N(\mathbf{w}|\mathbf{0}, (\tau\alpha)^{-1}I)\text{Gam}(\tau|a_0, b_0)\text{Gam}(\alpha|c_0, d_0) \\
 &= \prod_{n=1}^N N(y[n]|\langle \mathbf{x}[n, \cdot], \mathbf{w} \rangle, \tau^{-1}) \\
 &\quad \prod_{k=1}^K N(w[k]|0, (\tau\alpha)^{-1}) \\
 &\quad \text{Gam}(a_0, b_0)\text{Gam}(c_0, d_0) \\
 &= \prod_{n=1}^N \frac{1}{\sqrt{2\pi\tau^{-1}}} \exp\left(-\frac{(y[n] - \langle \mathbf{x}[n, \cdot], \mathbf{w} \rangle)^2}{2\tau^{-1}}\right) \\
 &\quad \prod_{k=1}^K \frac{1}{\sqrt{2\pi(\tau\alpha)^{-1}}} \exp\left(-\frac{w[k]^2}{2(\tau\alpha)^{-1}}\right) \\
 &\quad \text{Gam}(\tau|a_0, b_0)\text{Gam}(\alpha|c_0, d_0)
 \end{aligned} \tag{A.18}$$

The first equality comes from applying Bayes rule, the second one from substituting Eq. A.14, Eq. A.15, and Eq. A.16 into the first equality, the third one from the fact that the Gaussian distributions in the second equality are independent, and the last one from the definition of a Gaussian distribution.

$$\begin{aligned}
 \arg \max_{\mathbf{w}} J(\mathbf{w}) &= \arg \max_{\mathbf{w}} \log P(\mathbf{w}|\mathbf{y}, \tau, \alpha, \Phi) \\
 &= \arg \max_{\mathbf{w}} \log P(\mathbf{y}, \mathbf{w}, \tau, \alpha, \Phi) \\
 &= \arg \max_{\mathbf{w}} \left[ \sum_{n=1}^N -\frac{(y[n] - \langle \mathbf{x}[n, \cdot], \mathbf{w} \rangle)^2}{2\tau^{-1}} + \sum_{k=1}^K -\frac{w[k]^2}{2(\tau\alpha)^{-1}} \right] \\
 &= \arg \min_{\mathbf{w}} \left[ \sum_{n=1}^N \frac{(y[n] - \langle \mathbf{x}[n, \cdot], \mathbf{w} \rangle)^2}{2\tau^{-1}} + \sum_{k=1}^K \frac{w[k]^2}{2(\tau\alpha)^{-1}} \right] \\
 &= \arg \min_{\mathbf{w}} \left[ \sum_{n=1}^N (y[n] - \langle \mathbf{x}[n, \cdot], \mathbf{w} \rangle)^2 + \sum_{k=1}^K \frac{w[k]^2}{\alpha^{-1}} \right] \\
 &= \arg \min_{\mathbf{w}} [\text{MSE}(\mathbf{w}) + \alpha \|\mathbf{w}\|^2] \\
 &= \arg \min_{\mathbf{w}} \text{RMSE}(\mathbf{w})
 \end{aligned}$$

1 The first equality comes from the definition of  $J(\mathbf{w})$  in Eq. A.17, the second one from the fact that, by  
2 Bayes rule,  $P(\mathbf{w}|\mathbf{y}, \tau, \alpha, \Phi)$  equals  $P(\mathbf{y}, \mathbf{w}, \tau, \alpha, \Phi)$  times a factor independent of  $\mathbf{w}$  and thus  $\arg \max P(\mathbf{w}|\mathbf{y}, \tau, \alpha, \Phi) =$   
3  $\arg \max P(\mathbf{y}, \mathbf{w}, \tau, \alpha, \Phi)$ , the third one by discarding the terms not including  $\mathbf{w}$  in Eq. A.18 and taking the  
4 logarithm, the fourth one from the fact that the maximum of a function is the minimum of the negative  
5 of that function, the fifth one from the fact that  $\arg \min$  of a function does not change by multiplying  
6 this function by a constant, the sixth one from the definition of  $\text{MSE}(\mathbf{w})$  in Eq. A.12, and the final one  
7 from the definition of  $\text{RMSE}(\mathbf{w})$  in Eq. A.13.  $\square$

## 8 A.5.9 Adjustment for multiple comparisons in correlation tests

9 For a family of hypothesis  $H_1$  vs.  $H'_1$ ,  $H_2$  vs.  $H'_2$ ,  $\dots$ ,  $H_k$  vs.  $H'_k$ , we aim to control the Familywise Error  
10 Rate (FWE) defined as  $\text{FWE} = P(\text{Reject at least one } H_i | \text{all } H_i \text{ are true})$ . For this we define adjusted  
11 p-values,  $\tilde{p}_i$ ,  $i = 1, \dots, k$ , and we reject  $H_i$  at  $\text{FWE} = \alpha$  if and only if  $\tilde{p}_i \leq \alpha$ . We denote observed values  
12 with lowercase and the corresponding random variables with uppercase. The definition of the adjusted  
13 p-value,  $\tilde{p}_i$ , should guarantee that  $\text{FWE} = \alpha$ . That is,  $\alpha = \text{FWE} = P(\text{Reject at least one } H_i \text{ at level } \alpha | \text{all}$   
14  $H_i \text{ are true}) = P(\min_{1 \leq j \leq k} \tilde{P}_j \leq \alpha | \text{all } H_i \text{ are true})$ . We define  $\tilde{p}_i = P(\min_{1 \leq j \leq k} P_j \leq p_i | \text{all } H_i \text{ are true})$ ,  
15 where  $p_i$  is the observed non-adjusted p-value. When the p-values  $P_j$  are independent it can be shown  
16 (Westfall and Young, 1993, p. 47) that the previous definition leads to an exact multiple comparison  
17 method (i.e.,  $\text{FWE} = \alpha$ ).

18 In our tests of correlation, the hypothesis  $H_i$  ( $H'_i$ ) states that the correlation coefficient between  
19 two sequences  $\{a_1, \dots, a_n\}$  and  $\{b_1, \dots, b_n\}$  corresponding to the  $i$ th cluster, **standard modality**, and  
20 **attended modality** is zero (different from zero). To compute the adjusted p-value  $\tilde{p}_i$  we use a resampling  
21 procedure. We first generate  $n_{\text{Resamples}} = 5,000$  samples of  $\min_{1 \leq j \leq k} P_j$  under the null hypothesis that  
22 all  $H_i$  are true and then estimate  $\tilde{p}_i$  as the proportion of samples smaller or equal than the observed  
23 non-adjusted p-value  $p_i$ . To generate a sample of  $\min_{1 \leq j \leq k} P_j$  under the null hypothesis, for each cluster,  
24 **standard modality**, and **attended modality** we: (1) obtain the sequences  $\{a_1, \dots, a_n\}$  and  $\{b_1, \dots, b_n\}$  to  
25 test for significant correlation (e.g.,  $a_i =$  “correlation coefficient between models’ decodings and **SFPDs** for  
26 a subject  $i$ ” and  $b_i =$  “error rate for subject  $i$ ” in Figure 5a), (2) shuffle the sequence  $\{b_1, \dots, b_n\}$  (to be  
27 under the null hypothesis), (3) compute the p-value of the correlation coefficient between the  $\{a_1, \dots, a_n\}$   
28 and the shuffled  $\{b_1, \dots, b_n\}$ . The sample of  $\min_{1 \leq j \leq k} P_j$  under the null hypothesis is then the minimum  
29 of all p-values generated in step (3) across all clusters, **standard modalities**, and **attended modalities**.

30 We adjusted for multiple comparison correlation tests between (a) models’ decodings and **SFPDs**  
31 (Figure 2f, colored dots in Figure 3, Table A.4), (b) models’ decoding powers and subjects’ behavioral  
32 measures (Figure 5, daggers in Figure 3, Tables A.5 and A.6), and (c) subjects’ peak **ITC** values and  
33 subjects’ behavioral measures (Figure A.2, Tables A.1 and A.2). We begun by defining the family of  
34 hypothesis  $H_1$  vs.  $H'_1$ ,  $\dots$ ,  $H_k$  vs.  $H'_k$  in the definition of the FWE, see above. In (a) we used 19  
35 families of hypothesis, one per subject. The family for subject  $s$  contained hypothesis concerning cor-  
36 relation coefficients between model decodings and **SFPDs**, of all models for subject  $s$  across clusters,  
37 **standard modalities**, and **attended modalities**, that were significantly different from the intercept only  
38 model ( $p < 0.01$ ; likelihood-ratio permutation test, Section A.5.14). The null  $i$ th hypothesis for subject  
39  $s$  was  $H_i^s = \{\text{the correlation coefficient between models’ decodings and SFPDs for subject } s \text{ and the } i\text{th}$   
40  $\text{combination of cluster, standard modality, and attended modality is zero}\}$ . The mean and standard devi-  
41 ation of the number of pairs of hypothesis in a family of hypothesis for a subject was  $29.37 \pm 12.64$ . In (b)  
42 we used one family of hypothesis for error rates and another one for mean reaction times. Each of these  
43 families contained hypothesis regarding the correlation between models’ decoding powers and subjects’  
44 behavioral measures (error rates and mean reaction times) across all clusters, **standard modalities**, and  
45 **attended modalities**. Each of these correlations was evaluated across all models corresponding to a cluster,  
46 **standard modality**, and **attended modality**, as in Figure 5. The  $i$ th null hypothesis for behavioral measure

$b$  was  $H_i^b = \{\text{the correlation coefficient between models' decoding accuracies and subjects' behavioral measure } b \text{ for the } i\text{th combination of cluster, standard modality, and attended modality equals is zero}\}$ . Each family contained 56 pairs of hypothesis (14 clusters  $\times$  2 standard modalities  $\times$  2 attended modalities). The multiple comparisons procedure in (c) was as that in (b) but using ITC values at the corresponding peak ITC frequencies (Section A.5.4) instead of models' decoding powers.

#### A.5.10 Calculation of robust correlation coefficients and corresponding p-values

We used skipped measures of correlation (Wilcox, 2012) to characterize the association between pairs of variables in a way that was resistant to the presence of outliers. The calculation of these measures, and the estimation of their bootstrap confidence intervals, followed the procedures described in (Wilcox, 2012; Pernet et al., 2013).

Skipped correlations are obtained by checking for the presence of outliers, removing them, and applying some correlation coefficient to the remaining data (Wilcox, 2012, Chapter 9). We identified and removed bivariate outliers. Bivariate outliers were found using a projection method. The underlying idea behind projection methods is that, if a multivariate data point is an outlier, then it should be an outlier along some one-dimensional projection of all data points. For each data point  $\mathbf{X}_i$ , the projection method used in this manuscript orthogonally projected all data points onto the line joining a robust estimate of the center of the data cloud (given by the medians of the correlated variables) and  $\mathbf{X}_i$ , and then found the outliers of this one-dimensional projection using the boxplot rule (which is based on interquartiles distances, Frigge et al., 1989). A data point was declared outlier if it was an outlier in any one-dimensional projection. Bivariate outliers were selected using the function `outpro` freely available from the web site of Dr. Rand Wilcox at <http://dornsife.usc.edu/labs/rwilcox/software/>.

To estimate the association between single-trial decoding errors and SFPDs (e.g., Figure 2f), we used the skipped Pearson correlation coefficient (i.e., after outlier removal, the remaining data points were correlated using the Pearson product moment correlation coefficient; function `pcor` from Dr. Wilcox's website). The use of this correlation coefficient requires that the marginals of the data are approximately normal, as it was the case in the previous data.

The averaged behavioral data tended to be bimodally distributed, with a group of subjects displaying better performance and another group showing worse performance. Thus, the averaged behavioral data was not approximately normal, and it was not possible to use the skipped Pearson correlation coefficient to assess its association with models' decodings. Instead, we quantified this association using the skipped Spearman correlation coefficient (i.e., after outlier removal, the remaining data points were correlated using the Spearman rank correlation coefficient; function `spear` from Dr. Wilcox's website). The use of this correlation coefficient does not assume that the distribution of the correlated variables is bivariate normal, but requires that their association be monotonic, as it was the case for our averaged data.

To compute p-values corresponding to hypothesis tests of robust correlation coefficients we used permutation tests following the procedure given in Pernet et al. (2013). Given a dataset of two sequences to correlate, we (1) removed bivariate outliers from this dataset, (2) computed the correlation coefficient between the sequences in the outliers-removed dataset (using functions `pcor` and `spear` from Dr. Wilcox's website for Pearson and Spearman correlation coefficients, respectively), (3) computed `nResamples=5000` correlation coefficients between the first sequence and a random permutation of the second sequence in the outliers-removed dataset (again using functions `pcor` or `spear`), and (4) we calculated a two-sided p-value as the proportion of correlation coefficients computed in step (3) whose absolute value was larger than that of the correlation coefficient computed in step (2).



### A.5.11 ANOVA procedure

The ANOVA procedures described below started with a model with a large number of independent factors. We selected a subset of these factors using a stepwise procedure based on the Akaike Information Criterion, as implemented in the function `stepAIC` of the package `MASS` of R (R Core Team, 2012). We then tested for significant differences in the mean of the dependent variable across the selected subset of independent factors. We report the F-value and p-value of all significant effects. For the significant main effects we also report the p-value of posthoc tests for differences across the levels of the corresponding factors, and the sign of these differences.

#### Attentional effects in ANOVAs

Attentional effects in the `SFP` effect on `ITPC` could appear in ANOVAs as significant differences between models estimated from attended and unattended stimuli of the same or different `standard modalities` (e.g., a significant difference between models estimated from epochs aligned to the presentation time of visual standards with attention directed to the visual or auditory modality, or a significant difference between models estimated with attention directed to the visual modality from epochs aligned to the presentation of visual or auditory standards). Here we only study attentional effects in ANOVAs by comparing models estimated from attended and unattended stimuli of the same `standard modality`. We do so because differences in models estimated from stimuli of different `standard modalities` could be due to differences in brain responses to stimuli of distinct modalities and unrelated to attention.

As mentioned in Section 5.3, for any `standard modality`, the mean number of epochs aligned to the presentation of attended stimuli was larger than the mean number of epochs aligned to the presentation of unattended stimuli. This difference invalidates the comparison between models estimated from attended and unattended stimuli of the same `standard modality`, since any discrepancy between these models could simply be due to differences in the amount of data used to estimate them. Thus, attentional effects in the `SFP` effect on `ITPC` were investigated using ANOVAs on datasets where the number of epochs aligned to attended and unattended stimuli had been equalized, as described in Section 5.3.

#### Non-repeated-measures ANOVA

We performed non-repeated-measures ANOVAs using the function `aov` of the package `stats` of R (R Core Team, 2012). We removed from the analysis those trials for which the absolute value of the standardized residuals was greater than the 95% quantile of the normal distribution. When a significant main effect was observed in the ANOVA we created a set of confidence intervals on the differences between the means of the levels of the corresponding factor with 95% family-wise probability of coverage using the Tukey's 'Honest Significance Difference' method, as implemented in the function `TukeyHSD` of the package `stats` of R (R Core Team, 2012). For the pairs of levels with a significant difference in the mean of the dependent variable we reported the p-value, corrected for multiple comparison, of the test of the hypothesis that the previous difference is distinct from zero. We also reported the sign of this difference extracted from the sign of the corresponding confidence interval.

#### Repeated-measures ANOVA

We performed repeated-measures ANOVAs by estimating mixed-effects models [Pinheiro and Bates, 2000] with the function `lme` of package `nlme` of R (R Core Team, 2012). Trials for which the absolute value of the normalized residuals (i.e., standardized residuals pre-multiplied by the inverse square-root factor of the estimated error correlation matrix) was greater than the 95% quantile of the normal distribution were removed from the analysis. When a significant main effect was observed in the ANOVA, we performed posthoc hypothesis tests using the function `glht` from the package `multcomp` of R (R Core Team, 2012). This function controls for multiple comparisons by using multivariate t, or Gaussian, distributions to compute p-values associated with multiple hypothesis (Bretz et al., 2010).

## A.5.12 Further information on ANOVAs

**Maximum SFPD** (Section A.4): We performed an initial repeated-measures ANOVA (see *Repeated-measures ANOVA* in Section A.5.11) using data from all models significantly different from the intercept-only model ( $p < 0.01$ , likelihood-ratio permutation test, Section A.5.14) with the natural logarithm of the maximum SFPD as dependent variable (we selected this transformation of the dependent variable to normalize the distribution of the ANOVA residuals). The input to the stepwise selection procedure was a model with **standard modality**, **attended modality**, their interaction, and cluster of ICs as independent variables. This procedure selected a model with **standard modality**, **attended modality**, and their interaction as independent variables. An ANOVA on the selected model showed significant main effects for **attended modality** ( $F(1,615)=15.15$ ,  $p=0.0001$ ) and for the interaction between **standard modality** and **attended modality** ( $F(1,515)=0.0122$ ,  $p=0.0122$ ). Since this interaction indicates an attentional effect, we repeated the previous analysis in a dataset with equalized number of epochs aligned to the presentation of attended an unattended standards (see *Attentional effect in ANOVAs* in Section A.5.11). With the equalized dataset, the model selection procedure selected a model with only **attended modality** as independent factor, and an ANOVA on this model showed a significant main effect of this factor ( $F(1,579)=8.45$ ,  $p=0.0038$ ). A posthoc analysis indicated that the maximum SFPD was shorter for the visual than the auditory **attended modality** ( $z=2.91$ ,  $p=0.0018$ ).

**Absolute value of the correlation coefficient between models' decoding accuracies and subjects averaged behavioral measures** (Section 2.4): We performed a non-repeated-measures ANOVA (see *Non-repeated-measures ANOVA* in Section A.5.11) using data from all models significantly different from the intercept-only model ( $p < 0.01$ , likelihood-ratio permutation test, Section A.5.14) with the absolute value of the correlation coefficient between models' decoding accuracies and subjects mean reaction times or error rates as dependent variable. The input to the stepwise selection procedure was a model with **standard modality**, **attended modality**, their interaction, cluster of ICs, and type of behavioral measure (i.e., error rate or mean reaction times) as independent variables. This procedure selected a model with **standard modality** and type of behavioral measures as independent variables. An ANOVA on the selected model showed significant main effects of **attended modality** ( $F(1,109)=8.22$ ,  $p=0.005$ ) and of the type of behavioral measure ( $F(1,109)=7.26$ ,  $p=0.0082$ ). A posthoc analysis showed that the mean of the absolute value of the correlation coefficient was larger for the visual than the auditory **standard modality** ( $p=0.005$ ; Tukey test) and larger for error rates than mean reaction times ( $p=0.0082$ ; Tukey test).

**SFPD** (Section 5.3): We performed a repeated-measures ANOVA using data from all epochs with the cubic root of the SFPD as dependent variable (we selected this transformation of the dependent variable to normalize the distribution of the ANOVA residuals). The input to the stepwise selection procedure was a model with **standard modality**, **attended modality**, and their interaction as independent variables. This procedure selected a model with all independent variables. An ANOVA on the selected model showed a significant main effect of **attended modality** ( $F(1,16264)=234.31$ ,  $p < 0.0001$ ). A posthoc analysis showed that the mean SFPD was shorter in epochs where attention was directed to the visual than to the auditory modality ( $z=15.31$ ;  $p < 2e-16$ ).

**Time of Peak Coefficient** (Section 2.5): We performed a first repeated-measures ANOVA using data from all models significantly different from the intercept-only model ( $p < 0.01$ , likelihood-ratio permutation test, Section A.5.14) with the time of the largest peak as dependent variable. The input to the stepwise selection procedure was a model with **standard modality**, **attended modality**, group of clusters (as shown in Figure 3), and their triple interaction as independent variables. This procedure selected all independent variables and their interactions, but in a subsequent ANOVA only the effect due to the interaction between **standard modality** and groups of clusters ( $F(4, 230)=2.9026$ ,  $p=0.0227$ ) and the main

effect of **attended modality** ( $F(1, 230)=4.2590$ ,  $p=0.0402$ ) remained significant. A posthoc analysis on **attended modality** showed that the peak occurred earlier for auditory than visual attention ( $z=1.842$ ,  $p=0.0327$ , left black asterisk in Figure 6a). To disentangle the interaction between **standard modality** and group of clusters we performed a second and a third repeated-measures ANOVA using only models corresponding to visual and auditory standards, respectively.

The input to the stepwise procedure for the second repeated-measures ANOVA for models corresponding to visual standards was a model with peak time as dependent variable and **attended modality**, group of clusters, and their interaction as independent variables. This procedure selected all independent variables and interactions, but a subsequent ANOVA showed that only the main effects of **attended modality** ( $F(1,135)=11.1939$ ,  $p=0.0011$ ) and groups of clusters ( $F(4,135)=4.8073$ ,  $p=0.0022$ ) were significant. A posthoc analysis revealed that the peak of coefficients occurred earlier when attention was oriented to the visual than auditory modality ( $z=3.512$ ,  $p=0.000455$ ) and in central than occipital brain regions ( $z=4.163$ ,  $p=3.14e-5$ , red asterisks in Figure 6b).

The input to the stepwise procedure for the third repeated-measures ANOVA for models corresponding to auditory standards was the same as that for models corresponding to the visual modality. This procedure found no significant variable.

From Figure 6 it is apparent that the strongest modulations of the timing of the **SFP** effect on **ITPC** occur in the central group of clusters. To test this observation statistically, we performed a fourth repeated-measures ANOVA restricted to models corresponding to the central group of clusters. The input to the stepwise procedure was a model with peak time as dependent variable and **standard modality**, **attended modality**, and their interaction as independent variables. This procedure selected the two independent variables and their interaction. However, the significance of the interaction term disappeared when we repeated this analysis with a dataset with equal number of epochs aligned to the presentation of attended and unattended standards (see *Attentional effect in ANOVAs* in Section A.5.11), so we did not use the interaction term in the following. A repeated-measures ANOVA found significant main effects for **standard modality** ( $F(1, 43)=14.2173$ ,  $p=0.0005$ ) and for **attended modality** ( $F(1, 43)=4.5061$ ,  $p=0.0396$ ). A posthoc analysis showed that the peak coefficient occurred earlier in models corresponding to auditory standards ( $z=3.406$ ,  $p=0.000659$ ; black asterisks in Figure 6b), and in models estimated with attention directed to the auditory modality ( $z=2.178$ ,  $p=0.029360$ ; black asterisk next to *Central* cluster group in Figure 6a).

### A.5.13 Identification of peaks in coefficients

We identified positive and negative peaks in the coefficients of decoding models significantly different from the intercept-only model ( $p<0.01$ , likelihood-ratio permutation test, Section A.5.14). We only searched for peaks at coefficients significantly different from zero (95% bootstrap CI for regression coefficients, Section A.5.14), and occurring after 200 ms (to avoid possible effects from the **warning signal**). We filtered continuous subsets of the coefficients with a finite impulse response filter of type I, order two, and cutoff frequency of three times the peak **ITC** frequency. We selected in the filtered coefficients the local maxima larger than zero (local minima smaller than zero) as the positive (negative) peaks. From all positive and negative peaks, and from all continuous subsets of the coefficients, we selected the peak with maximum absolute value.

### A.5.14 Additional statistical information

Most statistical figures presented in this paper are based on the bootstrap method (Efron and Tibshirani, 1993).

**Crossvalidated decodings** All models decodings were cross validated using the leave-one-out method with the function `crossval` of the package `bootstrap` of R (R Core Team, 2012).

1 **95% bootstrap CIs for regression coefficients** (Figure 2e) We performed 2,000 ordinary bootstrap  
2 resamples of the trials (with the function `boot` of the package `boot` of R (R Core Team, 2012)), and  
3 for each resample we estimated a set of regression coefficients, as described in Section A.5.7. Having  
4 estimated 2,000 sets of regression coefficients, we computed 95% percentile confidence intervals with the  
5 function `boot.ci` of package `boot` of R (R Core Team, 2012).

6 **95% bootstrap CI for difference in paired means** of correlation coefficients obtained from the  
7 original versus a surrogate dataset (Figure A.1). For each pair of correlation coefficients (obtained  
8 by correlating **SFPDs** and their decodings in the original and surrogate datasets) we subtracted the  
9 correlation coefficient from the original minus the surrogate dataset. Then we performed 2,000 ordinary  
10 resamples (with the function `boot` of the package `boot` of R (R Core Team, 2012)) and computed a 95%  
11 percentile bootstrap confidence interval with the function `boot.ci` of package `boot` of R (R Core Team,  
12 2012).

13 **95% bootstrap CI for difference in averaged DMP** between trials with the longest and shortest  
14 **SFPD** (Figures 4a-c). We calculated 2,000 stratified bootstrap resamples of the 20% of trials with the  
15 shortest and longest **SFPDs**, using the function `boot` of the package `boot` of R (R Core Team, 2012) with  
16 the `strata` option). For each resample, and for each sample point, we subtracted from the mean **DMP**  
17 across the 20% of trials with longest **SFPD** the mean **DMP** across the 20% of trials with shortest **SFP**.  
18 Having estimated 2,000 bootstrap differences in average **DMP** values between trials with the longest and  
19 shortest **SFPD**, we computed a 95% percentile bootstrap confidence interval for these differences with  
20 the function `boot.ci` of package `boot` of R (R Core Team, 2012).

21 **Likelihood-ratio permutation test for linear model** We used it to test the alternative hypothesis,  
22  $H_1$ , that there is association between the dependent and independent variables of a linear regression  
23 model against the alternative one,  $H_0$ , that there is no association. The statistic for this test is the  
24 logarithm of the ratio between the likelihood of the data given a full model and that given a null model.  
25 A full model associates all independent variables with the dependent one, as in (A.11), while a null model  
26 associates only a constant term with the dependent variable. The likelihood of the data given a model is  
27 derived from (A.14). The test was conducted as follows. We first measured the value of the test statistic  
28 in the original dataset,  $T_{obs}$ . Then, we built the distribution of the test statistic under  $H_0$ , by generating  
29  $R=2000$  datasets where there was no association between the dependent and independent variables (by  
30 permuting the dependent value assigned to independent values) and measuring the test statistic in these  
31 datasets. The one-sided p-value of the test is the proportion of samples of the test statistic under  $H_0$   
32 that are larger than  $T_{obs}$ .

33 **Normalized cross correlation** (Section 2.3) We normalized the cross correlation (at lag zero) between  
34 two time series in such a way that the normalized correlation of a time series with itself is one. We  
35 defined:

$$ncor(x, y) = \frac{cor(x, y)}{\sqrt{cor(x, x)}\sqrt{cor(y, y)}}$$

36 where  $x$  and  $y$  are two time series, and  $ncor(x, y)$  and  $cor(x, y)$  are the normalized and unnormalized  
37 correlations, respectively, between these time series.

## 38 A.6 Supplementary figures

39 Figure A.7 shows average **DMPs** for the 20% trials with the shortest and longest **SFPDs** in **ICs** from  
40 the left parieto-occipital cluster 04.. Figure A.8 plots examples of deviant foreperiod effects on reaction  
41 times and detectability. Figure A.9 plots axial, coronal, and sagittal views of all clusters. Figure A.10  
42 plots the distribution of deviant latencies and **SFPDs**.

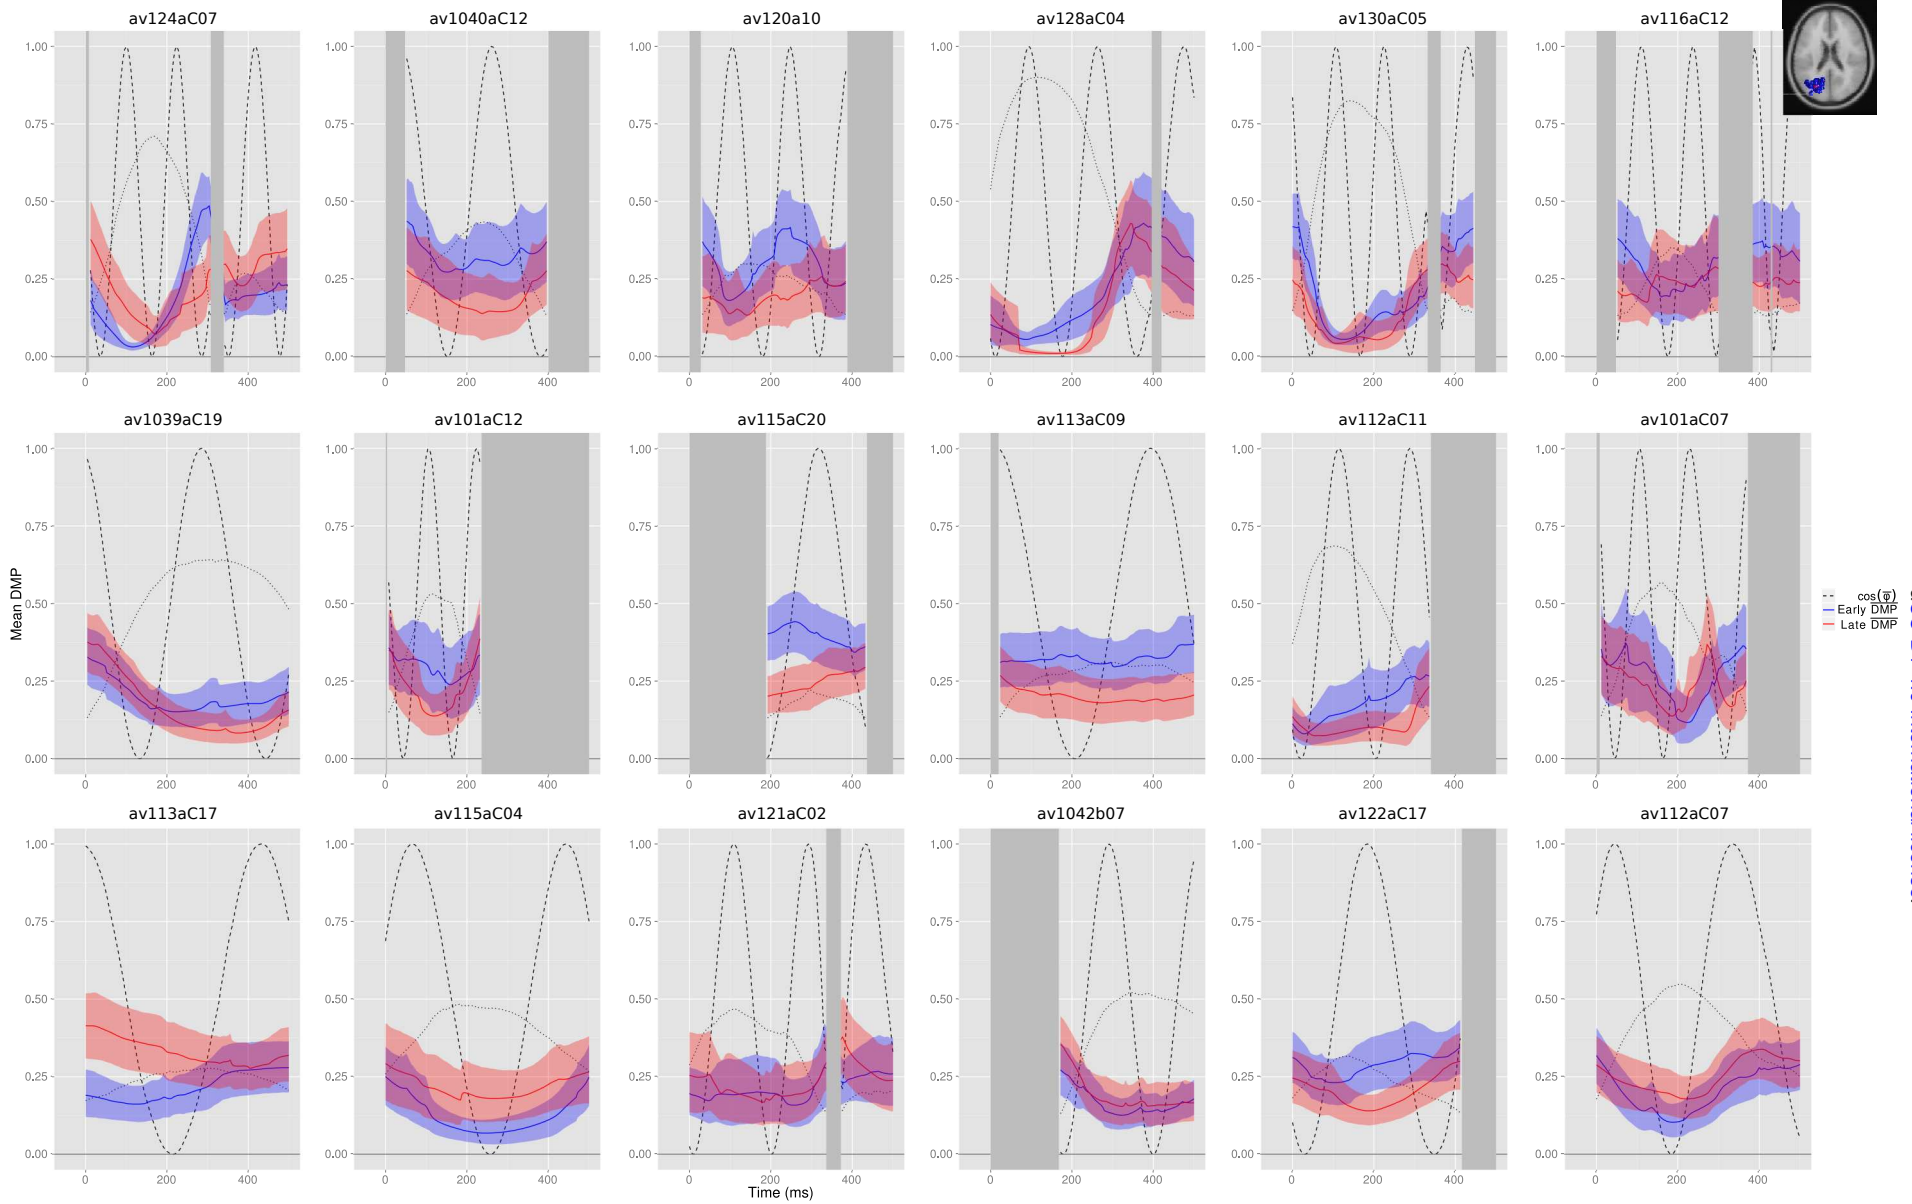

Figure A.7: Average **DMPs** for the 20% trials with the shortest (blue traces) and longest (red traces) **SFPDs** computed from trials from the left-parieto-occipital cluster 04 (top-right inset) and attended visual stimuli. Panels are sorted from left to right and top to bottom by decreasing decoding power of the corresponding model. These averages suggest that the averaged **DMP** oscillates at a frequency around 1 Hz and that the phase of these oscillations at time zero is different between trials closest and furthest away from the **warning signal**.

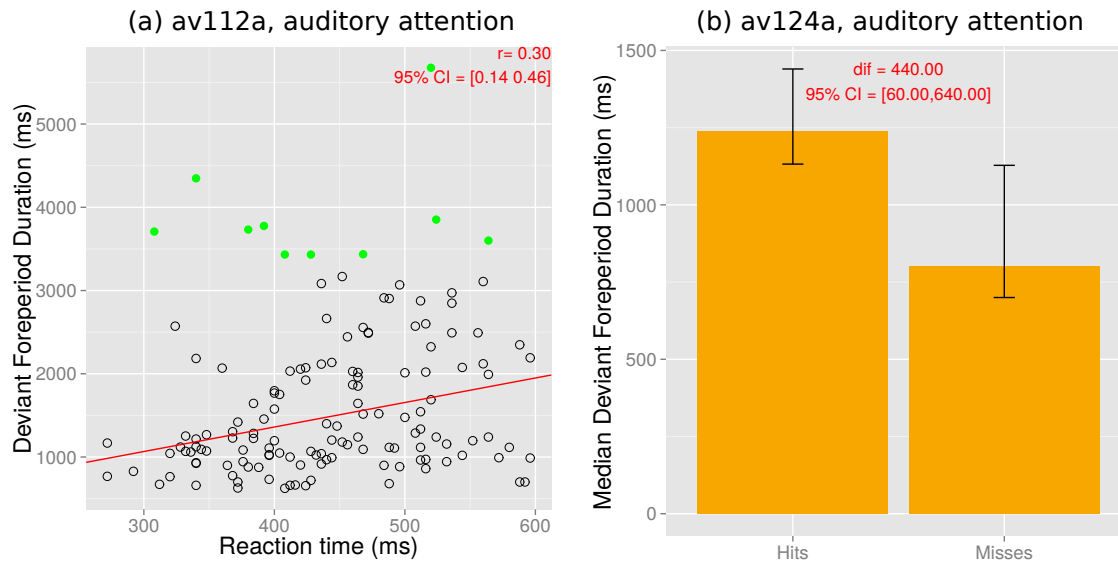

Figure A.8: Examples of significant deviant foreperiod effects on reaction times (a) and detectability (b). (a) Deviant foreperiod durations as a function of subject reaction times, for subject av112a and the auditory **attended modality**. Points colored in green indicate outliers detected in the computation of the robust correlation coefficient (Section A.5.10). (b) Median deviant foreperiod duration for hits and misses, for subject av124a and the auditory **attended modality**.

## A.7 Supplementary tables

Table A.3 provides the Talairach coordinates and anatomical labels of the centroids of the clusters in Figure 3. For each cluster, **standard modality**, and **attended modality**, Table A.4 gives the number of models with decodings significant correlated with SFPDs.

## A.8 Code and sample data

To facilitate the application of the single-trial decoding methods described in this manuscript to other EEG studies, we provide the R (**R Core Team, 2012**) code implementing these methods, the EEG data from the left parieto-occipital cluster 04, and instruction on how to use this code to analyze this data at <http://sccn.ucsd.edu/~rapela/avshift/codeAndSampleData/>

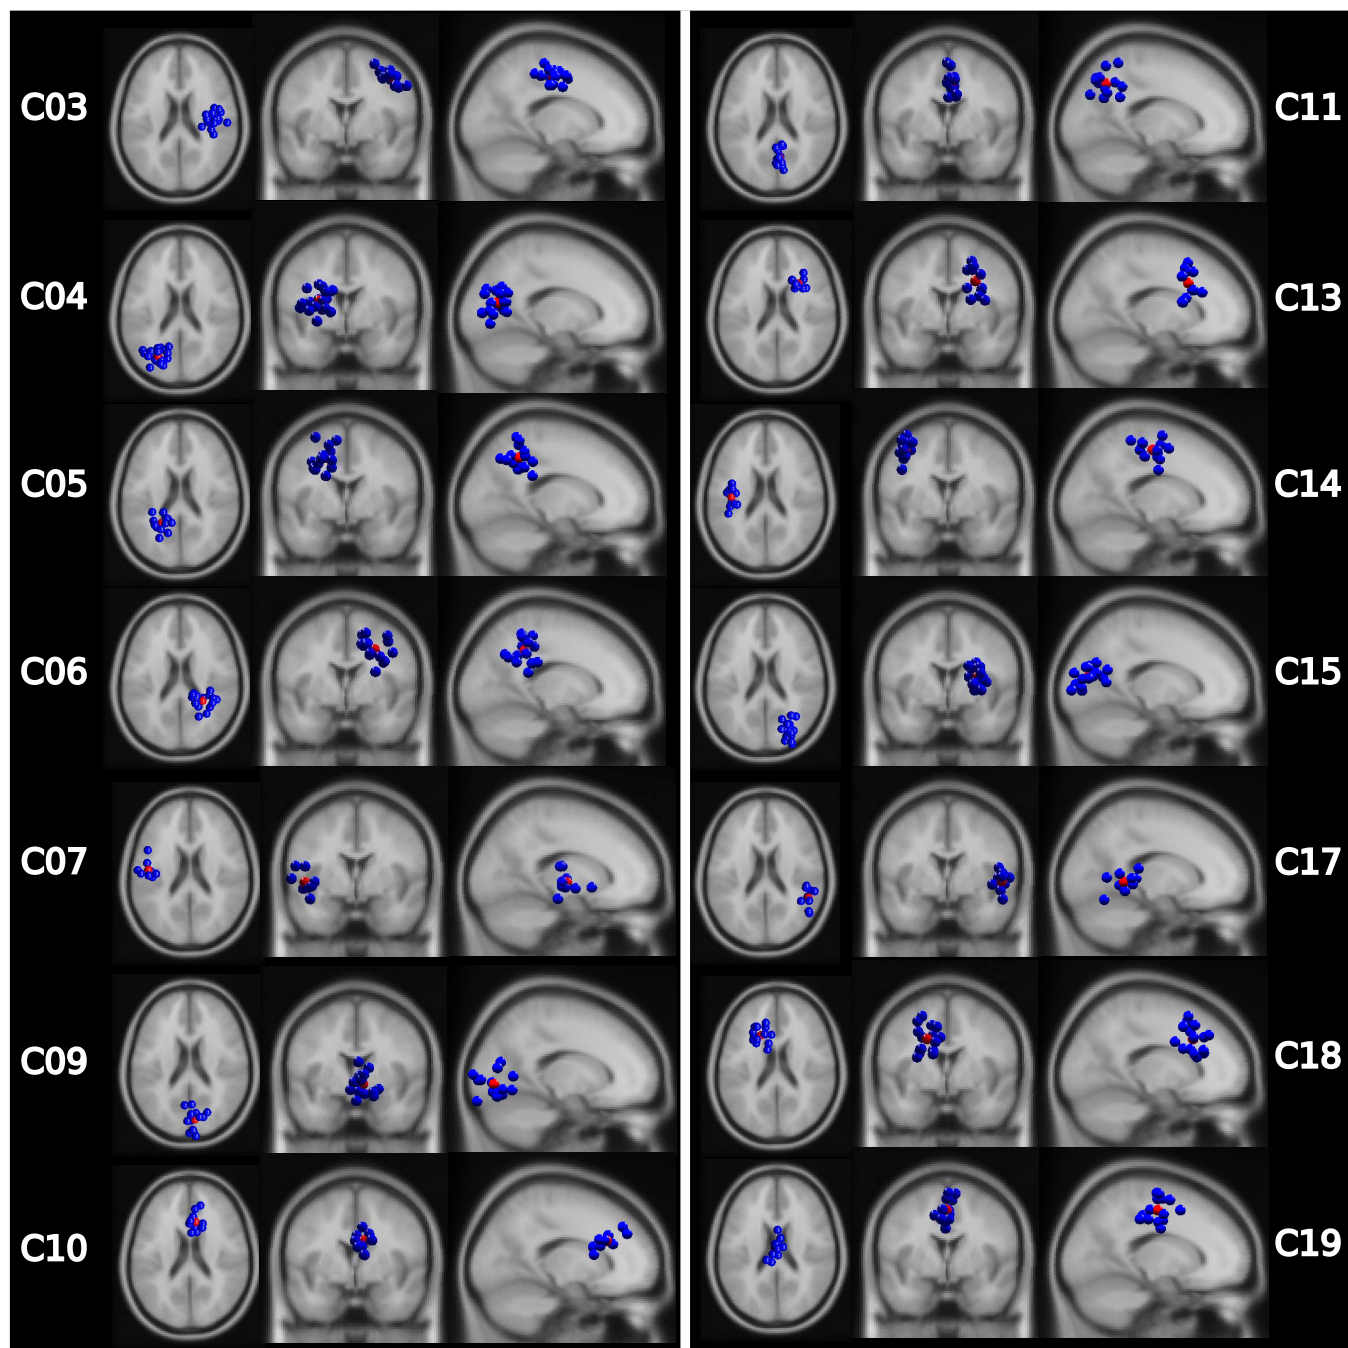

Figure A.9: Clusters of ICs. Left, center, and right columns correspond to axial, coronal, and sagittal views, respectively.

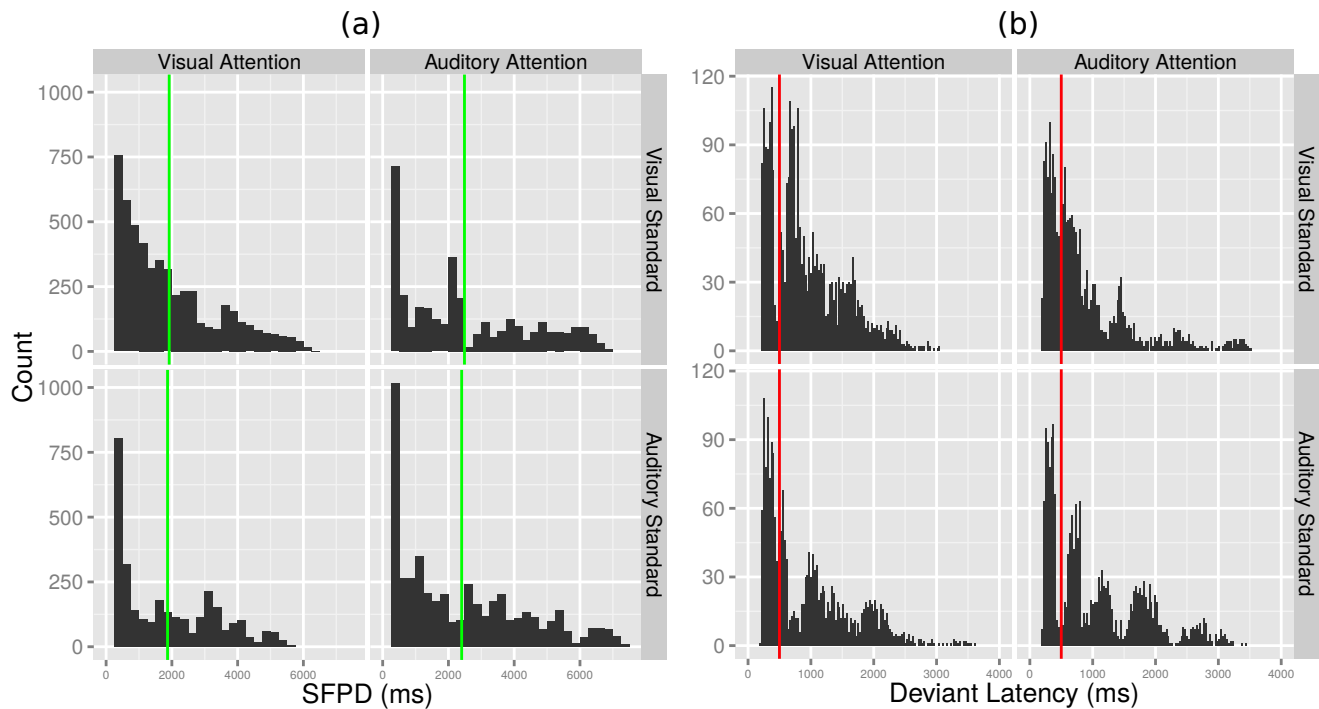

Figure A.10: Distributions of **SFPDs** (a) and of latencies of deviants (b) across **standard modalities** (rows) and **attended modalities** (columns). (a) The mean **SFPD** in epochs corresponding to visual attention (1.9 sec, left panels in (a)) is significantly shorter than that in epochs corresponding to auditory attention (2.4 sec, right panels in (a)), as for the optimal maximum **SFPDs** of models (see Section A.4). (b) To avoid possible response-related movements artifacts in the EEG, epochs including deviants with latencies shorter than 500 ms were excluded from the analysis. The number of such deviants is given by the sum of counts to the left of the red vertical lines in (b).



Table A.1: Correlations between peak ITC values and subjects' error rates. Each cell shows the correlation coefficient,  $r$ , and  $p$ -values unadjusted,  $p$ , and adjusted,  $adj\_p$ , for multiple comparisons. Blue cells highlight correlations with  $p < 0.05$ .

| Cluster | Standard Modality | Visual Attention |        |          | Auditory Attention |        |          |
|---------|-------------------|------------------|--------|----------|--------------------|--------|----------|
|         |                   | $r$              | $p$    | $adj\_p$ | $r$                | $p$    | $adj\_p$ |
| 03      | Visual            | -0.36            | 0.1624 | 1.00     | 0.35               | 0.2162 | 1.00     |
|         | Auditory          | -0.51            | 0.0656 | 0.99     | 0.15               | 0.6132 | 1.00     |
| 04      | Visual            | -0.53            | 0.0382 | 0.96     | -0.14              | 0.5882 | 1.00     |
|         | Auditory          | 0.52             | 0.0678 | 0.99     | -0.32              | 0.1938 | 1.00     |
| 05      | Visual            | -0.36            | 0.1944 | 1.00     | 0.13               | 0.6906 | 1.00     |
|         | Auditory          | -0.24            | 0.4678 | 1.00     | -0.38              | 0.2162 | 1.00     |
| 06      | Visual            | 0.03             | 0.9206 | 1.00     | -0.01              | 0.9718 | 1.00     |
|         | Auditory          | -0.23            | 0.4138 | 1.00     | -0.35              | 0.1852 | 1.00     |
| 07      | Visual            | -0.49            | 0.1682 | 1.00     | 0.20               | 0.6042 | 1.00     |
|         | Auditory          | -0.39            | 0.2816 | 1.00     | -0.33              | 0.3748 | 1.00     |
| 09      | Visual            | 0.03             | 0.9092 | 1.00     | -0.34              | 0.2234 | 1.00     |
|         | Auditory          | -0.62            | 0.0190 | 0.80     | -0.58              | 0.0278 | 0.90     |
| 10      | Visual            | -0.38            | 0.2706 | 1.00     | 0.31               | 0.4092 | 1.00     |
|         | Auditory          | -0.13            | 0.7218 | 1.00     | -0.10              | 0.7738 | 1.00     |
| 11      | Visual            | 0.12             | 0.7058 | 1.00     | 0.08               | 0.7788 | 1.00     |
|         | Auditory          | -0.69            | 0.0130 | 0.67     | -0.29              | 0.3292 | 1.00     |
| 13      | Visual            | -0.24            | 0.4756 | 1.00     | 0.77               | 0.0056 | 0.40     |
|         | Auditory          | -0.34            | 0.3394 | 1.00     | -0.72              | 0.0162 | 0.75     |
| 14      | Visual            | -0.50            | 0.0854 | 1.00     | -0.39              | 0.2208 | 1.00     |
|         | Auditory          | -0.27            | 0.3572 | 1.00     | -0.31              | 0.3626 | 1.00     |
| 15      | Visual            | 0.25             | 0.3156 | 1.00     | -0.02              | 0.9458 | 1.00     |
|         | Auditory          | -0.35            | 0.2036 | 1.00     | -0.54              | 0.0196 | 0.81     |
| 17      | Visual            | -0.25            | 0.5424 | 1.00     | -0.06              | 0.8630 | 1.00     |
|         | Auditory          | 0.48             | 0.2202 | 1.00     | -0.02              | 0.9368 | 1.00     |
| 18      | Visual            | -0.34            | 0.2390 | 1.00     | -0.03              | 0.9120 | 1.00     |
|         | Auditory          | -0.21            | 0.4862 | 1.00     | -0.67              | 0.0242 | 0.87     |
| 19      | Visual            | 0.15             | 0.5896 | 1.00     | 0.18               | 0.5638 | 1.00     |
|         | Auditory          | -0.04            | 0.9056 | 1.00     | -0.85              | 0.0010 | 0.11     |

Table A.2: Correlations between peak ITC values and subjects' mean reaction times. Same format as Table A.1.

| Cluster | Standard Modality | Visual Attention |        |       | Auditory Attention |        |       |
|---------|-------------------|------------------|--------|-------|--------------------|--------|-------|
|         |                   | r                | p      | adj-p | r                  | p      | adj-p |
| 03      | Visual            | -0.22            | 0.4036 | 1.00  | 0.25               | 0.3388 | 1.00  |
|         | Auditory          | -0.46            | 0.0602 | 0.97  | -0.09              | 0.7218 | 1.00  |
| 04      | Visual            | -0.08            | 0.7416 | 1.00  | 0.00               | 0.9882 | 1.00  |
|         | Auditory          | 0.02             | 0.9322 | 1.00  | -0.28              | 0.2512 | 1.00  |
| 05      | Visual            | 0.15             | 0.5894 | 1.00  | 0.41               | 0.1536 | 1.00  |
|         | Auditory          | -0.06            | 0.8322 | 1.00  | -0.19              | 0.5250 | 1.00  |
| 06      | Visual            | -0.28            | 0.2808 | 1.00  | 0.00               | 0.9882 | 1.00  |
|         | Auditory          | -0.23            | 0.4088 | 1.00  | -0.33              | 0.2104 | 1.00  |
| 07      | Visual            | -0.04            | 0.9086 | 1.00  | 0.08               | 0.8406 | 1.00  |
|         | Auditory          | 0.05             | 0.8878 | 1.00  | 0.03               | 0.9334 | 1.00  |
| 09      | Visual            | -0.16            | 0.5782 | 1.00  | -0.05              | 0.8532 | 1.00  |
|         | Auditory          | 0.12             | 0.6622 | 1.00  | -0.31              | 0.2766 | 1.00  |
| 10      | Visual            | 0.19             | 0.5968 | 1.00  | 0.40               | 0.2500 | 1.00  |
|         | Auditory          | 0.39             | 0.2844 | 1.00  | -0.04              | 0.9142 | 1.00  |
| 11      | Visual            | -0.21            | 0.4930 | 1.00  | -0.17              | 0.5838 | 1.00  |
|         | Auditory          | -0.43            | 0.1400 | 1.00  | 0.26               | 0.3822 | 1.00  |
| 13      | Visual            | 0.25             | 0.4262 | 1.00  | 0.54               | 0.0746 | 0.99  |
|         | Auditory          | 0.09             | 0.7674 | 1.00  | -0.26              | 0.4130 | 1.00  |
| 14      | Visual            | -0.24            | 0.4220 | 1.00  | -0.17              | 0.5694 | 1.00  |
|         | Auditory          | -0.27            | 0.3618 | 1.00  | -0.22              | 0.4852 | 1.00  |
| 15      | Visual            | -0.23            | 0.3250 | 1.00  | -0.03              | 0.9086 | 1.00  |
|         | Auditory          | 0.03             | 0.8986 | 1.00  | -0.23              | 0.3204 | 1.00  |
| 17      | Visual            | -0.18            | 0.6160 | 1.00  | 0.06               | 0.8692 | 1.00  |
|         | Auditory          | -0.15            | 0.6830 | 1.00  | -0.74              | 0.0250 | 0.78  |
| 18      | Visual            | -0.31            | 0.2542 | 1.00  | -0.58              | 0.0240 | 0.76  |
|         | Auditory          | 0.15             | 0.5918 | 1.00  | -0.21              | 0.4384 | 1.00  |
| 19      | Visual            | -0.39            | 0.1592 | 1.00  | -0.02              | 0.9502 | 1.00  |
|         | Auditory          | -0.13            | 0.6522 | 1.00  | -0.17              | 0.5450 | 1.00  |

Table A.3: Information about clusters of ICs. The anatomical labels associated with the Talairach coordinates of the clusters' centroids were extracted using the Talairach client (Lancaster et al., 1997, 2000)

| Cluster | No. Subjects | No. ICs | Talairach |     |     | Hemisphere           | Lobe           | Gyrus                   | Brodmann Area |
|---------|--------------|---------|-----------|-----|-----|----------------------|----------------|-------------------------|---------------|
|         |              |         | X         | Y   | Z   |                      |                |                         |               |
| 3       | 12           | 17      | 45        | -13 | 43  | Right                | Frontal Lobe   | Precentral Gyrus        | 4             |
| 4       | 14           | 18      | -19       | -74 | 9   | Left                 | Occipital Lobe | Cuneus                  | 17            |
| 5       | 11           | 14      | -14       | -42 | 33  | Left                 | Limbic Lobe    | Cingulate Gyrus         | 31            |
| 6       | 12           | 17      | 43        | -39 | 34  | Right                | Parietal Lobe  | Supramarginal Gyrus     | 40            |
| 7       | 8            | 9       | -38       | -18 | 1   | Left                 | Sub-lobar      | Clastrum                | *             |
| 8       | 3            | 4       | 56        | -1  | 12  | Right                | Frontal Lobe   | Precentral Gyrus        | 6             |
| 9       | 12           | 14      | 3         | -62 | 7   | Right                | Limbic Lobe    | Posterior Cingulate     | 30            |
| 10      | 9            | 10      | 6         | 17  | 18  | Right                | Limbic Lobe    | Anterior Cingulate      | 33            |
| 11      | 12           | 13      | 8         | -46 | 28  | Right                | Parietal Lobe  | Precuneus               | 31            |
| 12      | 3            | 4       | 7         | 18  | -50 | No Gray Matter found |                |                         |               |
| 13      | 11           | 12      | 30        | 10  | 34  | Right                | Frontal Lobe   | Middle Frontal Gyrus    | 8             |
| 14      | 10           | 13      | -35       | -25 | 53  | Left                 | Frontal Lobe   | Precentral Gyrus        | 4             |
| 15      | 16           | 20      | 23        | -87 | 10  | Right                | Occipital Lobe | Middle Occipital Gyrus  | 18            |
| 16      | 4            | 5       | 14        | 45  | -3  | Right                | Limbic Lobe    | Anterior Cingulate      | 32            |
| 17      | 7            | 9       | 48        | -33 | 4   | Right                | Temporal Lobe  | Superior Temporal Gyrus | 22            |
| 18      | 12           | 15      | -6        | 21  | 31  | Left                 | Limbic Lobe    | Cingulate Gyrus         | 32            |
| 19      | 12           | 14      | 2         | -7  | 42  | Right                | Limbic Lobe    | Cingulate Gyrus         | 24            |

Table A.4: Number (n) and proportion (%) of models with significant correlations ( $\text{adj}_p < 0.05$ ) between models' decodings and experimental **SFPDs**. Cells highlighted in color corresponds to clusters, standard modalities, and attended modalities with more than 40% of significant correlations

| Cluster | Standard Modality | Visual Attention |       | Auditory Attention |       |
|---------|-------------------|------------------|-------|--------------------|-------|
|         |                   | n                | %     | n                  | %     |
| 03      | Visual            | 05               | 0.29% | 06                 | 0.35% |
|         | Auditory          | 02               | 0.12% | 02                 | 0.12% |
| 04      | Visual            | 08               | 0.44% | 08                 | 0.44% |
|         | Auditory          | 02               | 0.11% | 05                 | 0.28% |
| 05      | Visual            | 04               | 0.29% | 02                 | 0.14% |
|         | Auditory          | 01               | 0.07% | 03                 | 0.21% |
| 06      | Visual            | 04               | 0.24% | 03                 | 0.18% |
|         | Auditory          | 05               | 0.29% | 06                 | 0.35% |
| 07      | Visual            | 01               | 0.11% | 01                 | 0.11% |
|         | Auditory          | 00               | 0.00% | 03                 | 0.33% |
| 09      | Visual            | 06               | 0.43% | 05                 | 0.36% |
|         | Auditory          | 03               | 0.21% | 05                 | 0.36% |
| 10      | Visual            | 01               | 0.10% | 02                 | 0.20% |
|         | Auditory          | 00               | 0.00% | 05                 | 0.50% |
| 11      | Visual            | 06               | 0.46% | 03                 | 0.23% |
|         | Auditory          | 03               | 0.23% | 04                 | 0.31% |
| 13      | Visual            | 03               | 0.25% | 02                 | 0.17% |
|         | Auditory          | 03               | 0.25% | 03                 | 0.25% |
| 14      | Visual            | 04               | 0.31% | 05                 | 0.38% |
|         | Auditory          | 04               | 0.31% | 02                 | 0.15% |
| 15      | Visual            | 11               | 0.55% | 07                 | 0.35% |
|         | Auditory          | 01               | 0.05% | 07                 | 0.35% |
| 17      | Visual            | 02               | 0.22% | 02                 | 0.22% |
|         | Auditory          | 03               | 0.33% | 03                 | 0.33% |
| 18      | Visual            | 01               | 0.07% | 03                 | 0.20% |
|         | Auditory          | 06               | 0.40% | 03                 | 0.20% |
| 19      | Visual            | 04               | 0.29% | 02                 | 0.14% |
|         | Auditory          | 03               | 0.21% | 04                 | 0.29% |

Table A.5: Correlations between the decoding accuracy of models and subjects' detection error rates. The decoding accuracy of a model is quantified with the correlation coefficient between decodings of the model and experimental **SFPDs**. Each cell shows the correlation coefficient,  $r$ , and  $p$ -values unadjusted,  $p$ , and adjusted,  $adj\_p$ , for multiple comparisons. Blue cells highlight correlations with  $p < 0.05$  and the red cell corresponds to  $adj\_p = 0.05$ .

| Cluster | Standard Modality | Visual Attention |        |          | Auditory Attention |        |          |
|---------|-------------------|------------------|--------|----------|--------------------|--------|----------|
|         |                   | $r$              | $p$    | $adj\_p$ | $r$                | $p$    | $adj\_p$ |
| 03      | Visual            | 0.29             | 0.3054 | 1.00     | 0.30               | 0.2714 | 1.00     |
|         | Auditory          | -0.07            | 0.8022 | 1.00     | -0.20              | 0.4766 | 1.00     |
| 04      | Visual            | -0.64            | 0.0048 | 0.38     | 0.16               | 0.5212 | 1.00     |
|         | Auditory          | 0.06             | 0.8360 | 1.00     | -0.12              | 0.6572 | 1.00     |
| 05      | Visual            | -0.50            | 0.0916 | 1.00     | -0.70              | 0.0162 | 0.77     |
|         | Auditory          | -0.22            | 0.4846 | 1.00     | -0.10              | 0.7612 | 1.00     |
| 06      | Visual            | -0.54            | 0.0336 | 0.95     | -0.33              | 0.2068 | 1.00     |
|         | Auditory          | 0.15             | 0.5650 | 1.00     | -0.23              | 0.3694 | 1.00     |
| 07      | Visual            | -0.74            | 0.0444 | 0.98     | 0.36               | 0.3490 | 1.00     |
|         | Auditory          | -0.17            | 0.6548 | 1.00     | -0.59              | 0.1016 | 1.00     |
| 09      | Visual            | -0.20            | 0.4902 | 1.00     | -0.43              | 0.1456 | 1.00     |
|         | Auditory          | -0.34            | 0.2412 | 1.00     | -0.25              | 0.3942 | 1.00     |
| 10      | Visual            | -0.29            | 0.4274 | 1.00     | 0.49               | 0.1706 | 1.00     |
|         | Auditory          | -0.18            | 0.6250 | 1.00     | -0.05              | 0.8794 | 1.00     |
| 11      | Visual            | 0.47             | 0.1218 | 1.00     | -0.29              | 0.3104 | 1.00     |
|         | Auditory          | -0.43            | 0.1388 | 1.00     | -0.34              | 0.2586 | 1.00     |
| 13      | Visual            | -0.19            | 0.5626 | 1.00     | 0.26               | 0.4390 | 1.00     |
|         | Auditory          | -0.23            | 0.5264 | 1.00     | 0.11               | 0.7402 | 1.00     |
| 14      | Visual            | -0.20            | 0.4964 | 1.00     | 0.34               | 0.2938 | 1.00     |
|         | Auditory          | 0.36             | 0.2404 | 1.00     | -0.21              | 0.5538 | 1.00     |
| 15      | Visual            | 0.23             | 0.3648 | 1.00     | -0.08              | 0.7376 | 1.00     |
|         | Auditory          | -0.38            | 0.1298 | 1.00     | -0.09              | 0.7108 | 1.00     |
| 17      | Visual            | 0.06             | 0.8684 | 1.00     | -0.29              | 0.4408 | 1.00     |
|         | Auditory          | 0.11             | 0.7900 | 1.00     | -0.08              | 0.8194 | 1.00     |
| 18      | Visual            | -0.10            | 0.7612 | 1.00     | -0.11              | 0.7054 | 1.00     |
|         | Auditory          | 0.07             | 0.8038 | 1.00     | -0.25              | 0.3922 | 1.00     |
| 19      | Visual            | -0.07            | 0.8098 | 1.00     | -0.91              | 0.0004 | 0.05     |
|         | Auditory          | -0.62            | 0.0216 | 0.85     | -0.07              | 0.8002 | 1.00     |

Table A.6: Correlations between the decoding accuracy of models and subjects' mean reaction times. Same format as Table A.5.

| Cluster | Standard Modality | Visual Attention |               |             | Auditory Attention |               |             |
|---------|-------------------|------------------|---------------|-------------|--------------------|---------------|-------------|
|         |                   | r                | p             | adj-p       | r                  | p             | adj-p       |
| 03      | Visual            | -0.30            | 0.2574        | 1.00        | 0.02               | 0.9392        | 1.00        |
|         | Auditory          | -0.25            | 0.3218        | 1.00        | 0.16               | 0.5410        | 1.00        |
| 04      | Visual            | -0.15            | 0.6102        | 1.00        | 0.22               | 0.3654        | 1.00        |
|         | Auditory          | -0.04            | 0.8712        | 1.00        | 0.14               | 0.5598        | 1.00        |
| 05      | Visual            | 0.13             | 0.6412        | 1.00        | <b>-0.57</b>       | <b>0.0318</b> | <b>0.84</b> |
|         | Auditory          | 0.09             | 0.7596        | 1.00        | -0.24              | 0.4150        | 1.00        |
| 06      | Visual            | -0.15            | 0.5712        | 1.00        | -0.14              | 0.5892        | 1.00        |
|         | Auditory          | 0.48             | 0.0534        | 0.96        | -0.16              | 0.5414        | 1.00        |
| 07      | Visual            | 0.20             | 0.5940        | 1.00        | -0.12              | 0.7456        | 1.00        |
|         | Auditory          | 0.11             | 0.7720        | 1.00        | -0.03              | 0.9420        | 1.00        |
| 09      | Visual            | -0.01            | 0.9686        | 1.00        | 0.09               | 0.7458        | 1.00        |
|         | Auditory          | 0.13             | 0.6486        | 1.00        | 0.11               | 0.6886        | 1.00        |
| 10      | Visual            | -0.40            | 0.2706        | 1.00        | 0.54               | 0.1098        | 1.00        |
|         | Auditory          | 0.36             | 0.3294        | 1.00        | -0.12              | 0.7308        | 1.00        |
| 11      | Visual            | 0.13             | 0.6674        | 1.00        | -0.02              | 0.9430        | 1.00        |
|         | Auditory          | -0.45            | 0.1306        | 1.00        | 0.14               | 0.6354        | 1.00        |
| 13      | Visual            | 0.12             | 0.6910        | 1.00        | 0.58               | 0.0524        | 0.95        |
|         | Auditory          | -0.01            | 0.9682        | 1.00        | 0.35               | 0.2622        | 1.00        |
| 14      | Visual            | -0.34            | 0.2598        | 1.00        | -0.03              | 0.9210        | 1.00        |
|         | Auditory          | -0.25            | 0.4040        | 1.00        | -0.07              | 0.7996        | 1.00        |
| 15      | Visual            | -0.04            | 0.8536        | 1.00        | -0.00              | 0.9890        | 1.00        |
|         | Auditory          | -0.07            | 0.7526        | 1.00        | -0.06              | 0.8010        | 1.00        |
| 17      | Visual            | -0.23            | 0.5416        | 1.00        | -0.07              | 0.8538        | 1.00        |
|         | Auditory          | 0.03             | 0.9172        | 1.00        | -0.10              | 0.7754        | 1.00        |
| 18      | Visual            | <b>-0.56</b>     | <b>0.0270</b> | <b>0.80</b> | 0.14               | 0.6256        | 1.00        |
|         | Auditory          | 0.01             | 0.9728        | 1.00        | -0.13              | 0.6502        | 1.00        |
| 19      | Visual            | <b>-0.57</b>     | <b>0.0336</b> | <b>0.86</b> | -0.35              | 0.2044        | 1.00        |
|         | Auditory          | -0.16            | 0.5780        | 1.00        | 0.18               | 0.5258        | 1.00        |
